# Supplementary material for: Meta-Analysis of Rose Rosette Disease-Resistant Quantitative Trait Loci and a Search for Candidate Genes
Source: MDPI journal article supplement (doi:10.3390/pathogens12040575), 2023-04-08
Supplement: s1 [file s1]

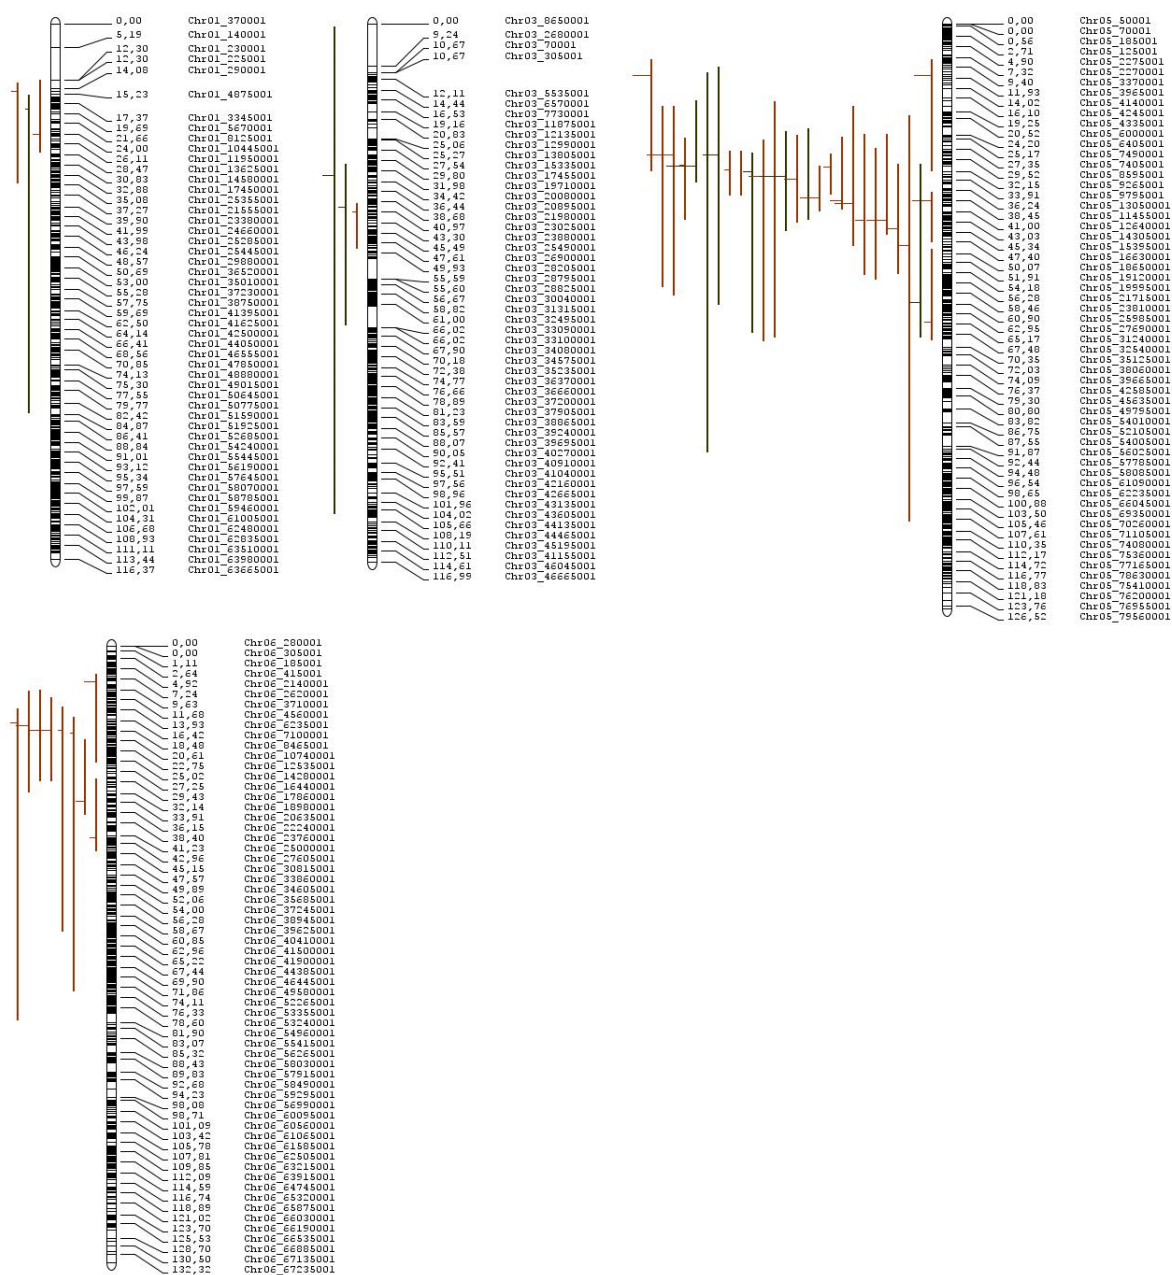

**Figure S1.** Consensus map of all data sets. Individual QTL to the left of the LG, and marker names with their position in cM to the right.
