# Supplementary material for: Meta-Analysis of Rose Rosette Disease-Resistant Quantitative Trait Loci and a Search for Candidate Genes
Source: Pathogens. 2023 Apr 8;12(4):575. doi: 10.3390/pathogens12040575 (PMC10146096; doi:10.3390/pathogens12040575)
Supplement: Supplementary file 1 [file pathogens-12-00575-s001.zip]

Archive with 13 entries (13 files):
- Figure_S1.pdf
- TableS1.xlsx
- TableS10.xlsx
- TableS11.xlsx
- TableS12.xlsx
- TableS2.xlsx
- TableS3.xlsx
- TableS4.xlsx
- TableS5.xlsx
- TableS6.xlsx
- TableS7.xlsx
- TableS8.xlsx
- TableS9.xlsx
