# Supplementary material for: Meta-Analysis of Rose Rosette Disease-Resistant Quantitative Trait Loci and a Search for Candidate Genes
Source: Pathogens. 2023 Apr 8;12(4):575. doi: 10.3390/pathogens12040575 (PMC10146096; doi:10.3390/pathogens12040575)
Supplement: Supplementary file 1 [file pathogens-12-00575-s001.zip › TableS1.xlsx]

## Sheet: Sheet1
Table S1. BExMG Map Statistics including map length, markers per cM, total markers, and max gap between markers.
LG	Map length (cM)	Markers/cM	Max gap	Total
1	100.29	16.82	1.78	1687
2	185.5	15.13	6.18	2807
3	105.43	15.49	4.81	1633
4	99.81	19.02	3.41	1898
5	121.54	12.97	4.66	1576
6	130.52	16.66	4.71	2175
7	131.69	15.46	2.55	2036
Total	874.78	15.94	4.01	13812
