# Supplementary material for: Meta-Analysis of Rose Rosette Disease-Resistant Quantitative Trait Loci and a Search for Candidate Genes
Source: Pathogens. 2023 Apr 8;12(4):575. doi: 10.3390/pathogens12040575 (PMC10146096; doi:10.3390/pathogens12040575)
Supplement: Supplementary file 1 [file pathogens-12-00575-s001.zip › TableS2.xlsx]

## Sheet: Sheet1
Table S2. SWxBE Map Statistics including map length, markers per cM, total markers, and max gap between markers.
LG	Map length (cM)	Markers/cM	Max gap	Total
1	139.06	12.56	3.25	1747
2	179.79	16.9	9	3038
3	135.03	13.79	5.56	1862
4	81.86	23.97	1.7	1962
5	156.91	15.21	2.8	2387
6	132.35	16.44	4.97	2176
7	119.96	20.32	1.46	2438
Total	944.96	17.03	4.11	15610
