# Supplementary material for: Meta-Analysis of Rose Rosette Disease-Resistant Quantitative Trait Loci and a Search for Candidate Genes
Source: Pathogens. 2023 Apr 8;12(4):575. doi: 10.3390/pathogens12040575 (PMC10146096; doi:10.3390/pathogens12040575)
Supplement: Supplementary file 1 [file pathogens-12-00575-s001.zip › TableS3.xlsx]

## Sheet: Sheet1
TableS3. J14.3xPH Map Statistics including map length, markers per cM, total markers, and max gap between markers.
LG	Map length (cM)	Markers/cM	Max gap	Total
1	72.22	12.18	4.24	880
2	118.26	9.39	6.34	1111
3	92.27	9.39	3.59	866
4	65.66	14.56	2.3	956
5	112.88	12.18	2.53	1375
6	93	16.22	4.11	1508
7	74.11	11.59	2.65	859
Total	628.4	12.22	3.68	7555
