# Supplementary material for: Meta-Analysis of Rose Rosette Disease-Resistant Quantitative Trait Loci and a Search for Candidate Genes
Source: Pathogens. 2023 Apr 8;12(4):575. doi: 10.3390/pathogens12040575 (PMC10146096; doi:10.3390/pathogens12040575)
Supplement: Supplementary file 1 [file pathogens-12-00575-s001.zip › TableS4.xlsx]

## Sheet: Sheet1
Table S4. T7.20xSE Map Statistics including map length, markers per cM, total markers, and max gap between markers.
LG	Map length (cM)	Markers/cM	Max gap	Total
1	52.72	7.28	2.41	384
2	89.16	8.13	7.25	725
3	86.27	7.5	10.12	647
4	48.43	9.79	2.39	474
5	84.93	9.34	3.29	793
6	96.53	10.71	4.45	1034
7	62.09	12.61	2.15	783
Total	520.13	9.34	4.58	4840
