# Supplementary material for: Meta-Analysis of Rose Rosette Disease-Resistant Quantitative Trait Loci and a Search for Candidate Genes
Source: Pathogens. 2023 Apr 8;12(4):575. doi: 10.3390/pathogens12040575 (PMC10146096; doi:10.3390/pathogens12040575)
Supplement: Supplementary file 1 [file pathogens-12-00575-s001.zip › TableS5.xlsx]

## Sheet: Sheet1
TableS5. T7.30xSE Map Statistics including map length, markers per cM, total markers, and max gap between markers.
LG	Map length (cM)	Markers/cM	Max gap	Total
1	66.64	9.68	2.12	645
2	148.18	7.42	8.94	1100
3	81.13	8.58	4.4	696
4	59.86	9.56	2.51	572
5	81.98	8.89	3.23	729
6	134.83	8.17	8.01	1101
7	90.43	10.04	4.39	908
Total	663.05	8.91	4.8	5751
