# Supplementary material for: Meta-Analysis of Rose Rosette Disease-Resistant Quantitative Trait Loci and a Search for Candidate Genes
Source: Pathogens. 2023 Apr 8;12(4):575. doi: 10.3390/pathogens12040575 (PMC10146096; doi:10.3390/pathogens12040575)
Supplement: Supplementary file 1 [file pathogens-12-00575-s001.zip › TableS6.xlsx]

## Sheet: Sheet 1
Table S6. List of candidate genes discovered in the MetaRRD1.1 interval including name, location, BLAST, functional analysis (InterPro), GO term and GO accession number.
Name	Unique.Name	Organism	Type	Genome.Transcriptome	Chromosome.Scaffold	Start.position	Stop.position	Location	BLAST	InterPro	GO.Term	GO.Accession
RC1G0012400	mRNA:RC1G0012400	Rosa chinensis	mRNA	Rosa chinensis Whole Genome v1.0 Assembly & Annotation	Chr01	1742358	1745854	Chr01:1742358..1745854	AT3G14470.1 | Symbols: | NB-ARC domain-containing disease resistance protein | chr3:4857940-4861104 FORWARD LENGTH=1054; PREDICTED: putative disease resistance RPP13-like protein 1 [Fragaria vesca subsp. vesca]; Putative disease resistance RPP13-like protein 1 OS=Arabidopsis thaliana GN=RPPL1 PE=3 SV=1; tr|M5XHK4|M5XHK4_PRUPE Uncharacterized protein OS=Prunus persica GN=PRUPE_ppa024377mg PE=3 SV=1	Activation of caspases through apoptosome-mediated cleavage; ADP binding; Coil; DISEASERSIST; Formation of apoptosome; L domain-like; LEUCINE-RICH REPEAT-CONTAINING PROTEIN; LRR_dom_sf; NB-ARC; Neutrophil degranulation; P-loop containing nucleoside triphosphate hydrolases; P-loop_NTPase; RNI-like; RX-CC_like; SUBFAMILY NOT NAMED; TP53 Regulates Transcription of Caspase Activators and Caspases; Tr…	ADP binding	GO:0043531
RC1G0015400	mRNA:RC1G0015400	Rosa chinensis	mRNA	Rosa chinensis Whole Genome v1.0 Assembly & Annotation	Chr01	1977225	1978112	Chr01:1977225..1978112	AT3G14470.1 | Symbols: | NB-ARC domain-containing disease resistance protein | chr3:4857940-4861104 FORWARD LENGTH=1054; PREDICTED: putative disease resistance RPP13-like protein 1 [Fragaria vesca subsp. vesca]; Putative disease resistance RPP13-like protein 1 OS=Arabidopsis thaliana GN=RPPL1 PE=3 SV=1; tr|M5XHK4|M5XHK4_PRUPE Uncharacterized protein OS=Prunus persica GN=PRUPE_ppa024377mg PE=3 SV=1	Activation of caspases through apoptosome-mediated cleavage; ADP binding; DISEASERSIST; Formation of apoptosome; LEUCINE-RICH REPEAT-CONTAINING PROTEIN; NB-ARC; Neutrophil degranulation; P-loop containing nucleoside triphosphate hydrolases; P-loop_NTPase; SUBFAMILY NOT NAMED; TP53 Regulates Transcription of Caspase Activators and Caspases; Transcriptional Regulation by E2F6; WH-like_DNA-bd_sf	ADP binding	GO:0043531
RC1G0035900	mRNA:RC1G0035900	Rosa chinensis	mRNA	Rosa chinensis Whole Genome v1.0 Assembly & Annotation	Chr01	4772090	4776326	Chr01:4772090..4776326	AT3G14470.1 | Symbols: | NB-ARC domain-containing disease resistance protein | chr3:4857940-4861104 FORWARD LENGTH=1054; PREDICTED: putative disease resistance protein RGA3 [Fragaria vesca subsp. vesca] &gt;gi|764600663|ref|XP_011466503.1| PREDICTED: putative disease resistance protein RGA3 [Fragaria vesca subsp. vesca]; Putative disease resistance protein RGA3 OS=Solanum bulbocastanum GN=RGA3 PE…	AAA; Activation of caspases through apoptosome-mediated cleavage; ADP binding; DISEASERSIST; Formation of apoptosome; L domain-like; LEUCINE-RICH REPEAT-CONTAINING PROTEIN; LRR_dom_sf; NB-ARC; Neutrophil degranulation; P-loop containing nucleoside triphosphate hydrolases; P-loop_NTPase; RNI-like; RX-CC_like; SUBFAMILY NOT NAMED; TP53 Regulates Transcription of Caspase Activators and Caspases; Tra…	ADP binding	GO:0043531
RC1G0036600	mRNA:RC1G0036600	Rosa chinensis	mRNA	Rosa chinensis Whole Genome v1.0 Assembly & Annotation	Chr01	4825651	4829916	Chr01:4825651..4829916	AT3G14470.1 | Symbols: | NB-ARC domain-containing disease resistance protein | chr3:4857940-4861104 FORWARD LENGTH=1054; PREDICTED: putative disease resistance protein RGA3 [Fragaria vesca subsp. vesca] &gt;gi|764600663|ref|XP_011466503.1| PREDICTED: putative disease resistance protein RGA3 [Fragaria vesca subsp. vesca]; Putative disease resistance protein RGA3 OS=Solanum bulbocastanum GN=RGA3 PE…	AAA; Activation of caspases through apoptosome-mediated cleavage; ADP binding; DISEASERSIST; Formation of apoptosome; L domain-like; LEUCINE-RICH REPEAT-CONTAINING PROTEIN; LRR_dom_sf; NB-ARC; Neutrophil degranulation; P-loop containing nucleoside triphosphate hydrolases; P-loop_NTPase; RNI-like; RX-CC_like; SUBFAMILY NOT NAMED; TP53 Regulates Transcription of Caspase Activators and Caspases; Tra…	ADP binding	GO:0043531
RC1G0037000	mRNA:RC1G0037000	Rosa chinensis	mRNA	Rosa chinensis Whole Genome v1.0 Assembly & Annotation	Chr01	4845477	4854130	Chr01:4845477..4854130	AT3G14470.1 | Symbols: | NB-ARC domain-containing disease resistance protein | chr3:4857940-4861104 FORWARD LENGTH=1054; PREDICTED: putative disease resistance protein RGA3 [Fragaria vesca subsp. vesca] &gt;gi|764600663|ref|XP_011466503.1| PREDICTED: putative disease resistance protein RGA3 [Fragaria vesca subsp. vesca]; Putative disease resistance protein RGA3 OS=Solanum bulbocastanum GN=RGA3 PE…	AAA; Activation of caspases through apoptosome-mediated cleavage; ADP binding; DISEASERSIST; Formation of apoptosome; L domain-like; LEUCINE-RICH REPEAT-CONTAINING PROTEIN; LRR_dom_sf; NB-ARC; Neutrophil degranulation; P-loop containing nucleoside triphosphate hydrolases; P-loop_NTPase; RNI-like; RX-CC_like; SUBFAMILY NOT NAMED; TP53 Regulates Transcription of Caspase Activators and Caspases; Tra…	ADP binding	GO:0043531
RC1G0038100	mRNA:RC1G0038100	Rosa chinensis	mRNA	Rosa chinensis Whole Genome v1.0 Assembly & Annotation	Chr01	4945293	4950173	Chr01:4945293..4950173	AT3G14470.1 | Symbols: | NB-ARC domain-containing disease resistance protein | chr3:4857940-4861104 FORWARD LENGTH=1054; PREDICTED: putative disease resistance protein At3g14460 isoform X1 [Fragaria vesca subsp. vesca]; Putative disease resistance RPP13-like protein 1 OS=Arabidopsis thaliana GN=RPPL1 PE=3 SV=1; tr|M5X7R2|M5X7R2_PRUPE Uncharacterized protein OS=Prunus persica GN=PRUPE_ppa000247mg …	Activation of caspases through apoptosome-mediated cleavage; ADP binding; Coil; DISEASERSIST; disorder_prediction; Formation of apoptosome; L domain-like; LEUCINE-RICH REPEAT-CONTAINING PROTEIN; LRR_dom_sf; NB-ARC; Neutrophil degranulation; P-loop containing nucleoside triphosphate hydrolases; P-loop_NTPase; Rcpt_L-dom_sf; RX-CC_like; SUBFAMILY NOT NAMED; TP53 Regulates Transcription of Caspase A…	ADP binding	GO:0043531
RC1G0041300	mRNA:RC1G0041300	Rosa chinensis	mRNA	Rosa chinensis Whole Genome v1.0 Assembly & Annotation	Chr01	5325468	5330421	Chr01:5325468..5330421	AT3G14470.1 | Symbols: | NB-ARC domain-containing disease resistance protein | chr3:4857940-4861104 FORWARD LENGTH=1054; PREDICTED: putative disease resistance RPP13-like protein 1 [Pyrus x bretschneideri]; Putative disease resistance RPP13-like protein 1 OS=Arabidopsis thaliana GN=RPPL1 PE=3 SV=1; tr|A0A061GU66|A0A061GU66_THECC LRR and NB-ARC domains-containing disease resistance protein, putati…	Activation of caspases through apoptosome-mediated cleavage; ADP binding; DISEASERSIST; Formation of apoptosome; L domain-like; LEUCINE-RICH REPEAT-CONTAINING PROTEIN; LRR_dom_sf; NB-ARC; Neutrophil degranulation; P-loop containing nucleoside triphosphate hydrolases; P-loop_NTPase; SUBFAMILY NOT NAMED; TP53 Regulates Transcription of Caspase Activators and Caspases; Transcriptional Regulation by …	ADP binding	GO:0043531
RC1G0046400	mRNA:RC1G0046400	Rosa chinensis	mRNA	Rosa chinensis Whole Genome v1.0 Assembly & Annotation	Chr01	6001575	6004952	Chr01:6001575..6004952	AT3G14470.1 | Symbols: | NB-ARC domain-containing disease resistance protein | chr3:4857940-4861104 FORWARD LENGTH=1054; PREDICTED: putative disease resistance RPP13-like protein 1 [Fragaria vesca subsp. vesca]; Putative disease resistance RPP13-like protein 1 OS=Arabidopsis thaliana GN=RPPL1 PE=3 SV=1; tr|M5W2F8|M5W2F8_PRUPE Uncharacterized protein OS=Prunus persica GN=PRUPE_ppa024822mg PE=3 SV=1	Activation of caspases through apoptosome-mediated cleavage; ADP binding; Coil; DISEASERSIST; Formation of apoptosome; L domain-like; LEUCINE-RICH REPEAT-CONTAINING PROTEIN; LRR_dom_sf; NB-ARC; Neutrophil degranulation; P-loop containing nucleoside triphosphate hydrolases; P-loop_NTPase; Rcpt_L-dom_sf; SUBFAMILY NOT NAMED; TP53 Regulates Transcription of Caspase Activators and Caspases; Transcrip…	ADP binding	GO:0043531
RC1G0046600	mRNA:RC1G0046600	Rosa chinensis	mRNA	Rosa chinensis Whole Genome v1.0 Assembly & Annotation	Chr01	6015473	6021617	Chr01:6015473..6021617	AT3G14470.1 | Symbols: | NB-ARC domain-containing disease resistance protein | chr3:4857940-4861104 FORWARD LENGTH=1054; PREDICTED: putative disease resistance RPP13-like protein 1 [Fragaria vesca subsp. vesca]; Putative disease resistance RPP13-like protein 1 OS=Arabidopsis thaliana GN=RPPL1 PE=3 SV=1; tr|M5W2F8|M5W2F8_PRUPE Uncharacterized protein OS=Prunus persica GN=PRUPE_ppa024822mg PE=3 SV=1	Activation of caspases through apoptosome-mediated cleavage; ADP binding; Coil; DISEASERSIST; Formation of apoptosome; L domain-like; LEUCINE-RICH REPEAT-CONTAINING PROTEIN; LRR_dom_sf; NB-ARC; Neutrophil degranulation; P-loop containing nucleoside triphosphate hydrolases; P-loop_NTPase; SUBFAMILY NOT NAMED; TP53 Regulates Transcription of Caspase Activators and Caspases; Transcriptional Regulati…	ADP binding	GO:0043531
RC1G0046700	mRNA:RC1G0046700	Rosa chinensis	mRNA	Rosa chinensis Whole Genome v1.0 Assembly & Annotation	Chr01	6022946	6027291	Chr01:6022946..6027291	AT3G14470.1 | Symbols: | NB-ARC domain-containing disease resistance protein | chr3:4857940-4861104 FORWARD LENGTH=1054; PREDICTED: putative disease resistance RPP13-like protein 1 isoform X1 [Fragaria vesca subsp. vesca]; Putative disease resistance RPP13-like protein 1 OS=Arabidopsis thaliana GN=RPPL1 PE=3 SV=1; tr|A0A1R3JJS8|A0A1R3JJS8_9ROSI Disease resistance protein OS=Corchorus capsularis G…	Activation of caspases through apoptosome-mediated cleavage; ADP binding; DISEASERSIST; Formation of apoptosome; L domain-like; LEUCINE-RICH REPEAT-CONTAINING PROTEIN; Leu-rich_rpt; LRR; LRR_dom_sf; NB-ARC; Neutrophil degranulation; P-loop containing nucleoside triphosphate hydrolases; P-loop_NTPase; protein binding; RX-CC_like; SUBFAMILY NOT NAMED; TP53 Regulates Transcription of Caspase Activat…	ADP binding; protein binding	GO:0005515; GO:0043531
RC1G0054000	mRNA:RC1G0054000	Rosa chinensis	mRNA	Rosa chinensis Whole Genome v1.0 Assembly & Annotation	Chr01	6873096	6882290	Chr01:6873096..6882290	AT3G14470.1 | Symbols: | NB-ARC domain-containing disease resistance protein | chr3:4857940-4861104 FORWARD LENGTH=1054; PREDICTED: putative disease resistance RPP13-like protein 1 [Fragaria vesca subsp. vesca] &gt;gi|764603706|ref|XP_004303061.2| PREDICTED: putative disease resistance RPP13-like protein 1 [Fragaria vesca subsp. vesca]; Putative disease resistance RPP13-like protein 1 OS=Arabidop…	Activation of caspases through apoptosome-mediated cleavage; ADP binding; Coil; DISEASERSIST; Formation of apoptosome; L domain-like; LEUCINE-RICH REPEAT-CONTAINING PROTEIN; Leu-rich_rpt; LRR; LRR_dom_sf; NB-ARC; Neutrophil degranulation; P-loop containing nucleoside triphosphate hydrolases; P-loop_NTPase; protein binding; SUBFAMILY NOT NAMED; TP53 Regulates Transcription of Caspase Activators an…	ADP binding; protein binding	GO:0005515; GO:0043531
RC1G0054700	mRNA:RC1G0054700	Rosa chinensis	mRNA	Rosa chinensis Whole Genome v1.0 Assembly & Annotation	Chr01	6918760	6921635	Chr01:6918760..6921635	AT3G14470.1 | Symbols: | NB-ARC domain-containing disease resistance protein | chr3:4857940-4861104 FORWARD LENGTH=1054; PREDICTED: putative disease resistance RPP13-like protein 1 [Fragaria vesca subsp. vesca] &gt;gi|764603706|ref|XP_004303061.2| PREDICTED: putative disease resistance RPP13-like protein 1 [Fragaria vesca subsp. vesca]; Putative disease resistance RPP13-like protein 1 OS=Arabidop…	Activation of caspases through apoptosome-mediated cleavage; ADP binding; Coil; DISEASERSIST; disorder_prediction; Formation of apoptosome; L domain-like; LEUCINE-RICH REPEAT-CONTAINING PROTEIN; Leu-rich_rpt; LRR; LRR_dom_sf; NB-ARC; Neutrophil degranulation; P-loop containing nucleoside triphosphate hydrolases; P-loop_NTPase; protein binding; RX-CC_like; SUBFAMILY NOT NAMED; TP53 Regulates Trans…	ADP binding; protein binding	GO:0005515; GO:0043531
RC1G0055000	mRNA:RC1G0055000	Rosa chinensis	mRNA	Rosa chinensis Whole Genome v1.0 Assembly & Annotation	Chr01	7020069	7022309	Chr01:7020069..7022309	AT3G14470.1 | Symbols: | NB-ARC domain-containing disease resistance protein | chr3:4857940-4861104 FORWARD LENGTH=1054; PREDICTED: putative disease resistance RPP13-like protein 1 [Fragaria vesca subsp. vesca] &gt;gi|764603706|ref|XP_004303061.2| PREDICTED: putative disease resistance RPP13-like protein 1 [Fragaria vesca subsp. vesca]; Putative disease resistance RPP13-like protein 1 OS=Arabidop…	Activation of caspases through apoptosome-mediated cleavage; ADP binding; DISEASERSIST; Fer4_NifH; Formation of apoptosome; L domain-like; LEUCINE-RICH REPEAT-CONTAINING PROTEIN; Leu-rich_rpt; LRR; LRR_dom_sf; NB-ARC; Neutrophil degranulation; P-loop containing nucleoside triphosphate hydrolases; P-loop_NTPase; protein binding; RX-CC_like; SUBFAMILY NOT NAMED; TP53 Regulates Transcription of Casp…	ADP binding; protein binding	GO:0005515; GO:0043531
RC1G0056000	mRNA:RC1G0056000	Rosa chinensis	mRNA	Rosa chinensis Whole Genome v1.0 Assembly & Annotation	Chr01	7101548	7101967	Chr01:7101548..7101967	AT3G14470.1 | Symbols: | NB-ARC domain-containing disease resistance protein | chr3:4857940-4861104 FORWARD LENGTH=1054; PREDICTED: putative disease resistance RPP13-like protein 1 [Fragaria vesca subsp. vesca] &gt;gi|764603706|ref|XP_004303061.2| PREDICTED: putative disease resistance RPP13-like protein 1 [Fragaria vesca subsp. vesca]; Putative disease resistance RPP13-like protein 1 OS=Arabidop…	L domain-like; LEUCINE-RICH REPEAT-CONTAINING PROTEIN; LRR_dom_sf; SUBFAMILY NOT NAMED
RC1G0056100	mRNA:RC1G0056100	Rosa chinensis	mRNA	Rosa chinensis Whole Genome v1.0 Assembly & Annotation	Chr01	7102282	7103188	Chr01:7102282..7103188	AT3G14470.1 | Symbols: | NB-ARC domain-containing disease resistance protein | chr3:4857940-4861104 FORWARD LENGTH=1054; PREDICTED: putative disease resistance RPP13-like protein 1 [Fragaria vesca subsp. vesca] &gt;gi|764603706|ref|XP_004303061.2| PREDICTED: putative disease resistance RPP13-like protein 1 [Fragaria vesca subsp. vesca]; Putative disease resistance RPP13-like protein 1 OS=Arabidop…	Activation of caspases through apoptosome-mediated cleavage; ADP binding; DISEASERSIST; Formation of apoptosome; L domain-like; LEUCINE-RICH REPEAT-CONTAINING PROTEIN; LRR_dom_sf; NB-ARC; Neutrophil degranulation; P-loop containing nucleoside triphosphate hydrolases; P-loop_NTPase; SUBFAMILY NOT NAMED; TP53 Regulates Transcription of Caspase Activators and Caspases; Transcriptional Regulation by …	ADP binding	GO:0043531
RC1G0056200	mRNA:RC1G0056200	Rosa chinensis	mRNA	Rosa chinensis Whole Genome v1.0 Assembly & Annotation	Chr01	7104543	7105862	Chr01:7104543..7105862	AT3G14470.1 | Symbols: | NB-ARC domain-containing disease resistance protein | chr3:4857940-4861104 FORWARD LENGTH=1054; PREDICTED: putative disease resistance RPP13-like protein 1 [Pyrus x bretschneideri]; Putative disease resistance protein RGA4 OS=Solanum bulbocastanum GN=RGA4 PE=2 SV=1; tr|M5XHK4|M5XHK4_PRUPE Uncharacterized protein OS=Prunus persica GN=PRUPE_ppa024377mg PE=3 SV=1	Activation of caspases through apoptosome-mediated cleavage; ADP binding; DISEASERSIST; disorder_prediction; Formation of apoptosome; LEUCINE-RICH REPEAT-CONTAINING PROTEIN; NB-ARC; Neutrophil degranulation; P-loop containing nucleoside triphosphate hydrolases; P-loop_NTPase; RX-CC_like; SUBFAMILY NOT NAMED; TP53 Regulates Transcription of Caspase Activators and Caspases; Transcriptional Regulati…	ADP binding	GO:0043531
RC1G0056600	mRNA:RC1G0056600	Rosa chinensis	mRNA	Rosa chinensis Whole Genome v1.0 Assembly & Annotation	Chr01	7207539	7210574	Chr01:7207539..7210574	AT3G14470.1 | Symbols: | NB-ARC domain-containing disease resistance protein | chr3:4857940-4861104 FORWARD LENGTH=1054; PREDICTED: putative disease resistance RPP13-like protein 1 [Fragaria vesca subsp. vesca] &gt;gi|764603706|ref|XP_004303061.2| PREDICTED: putative disease resistance RPP13-like protein 1 [Fragaria vesca subsp. vesca]; Putative disease resistance RPP13-like protein 1 OS=Arabidop…	Activation of caspases through apoptosome-mediated cleavage; ADP binding; DISEASERSIST; disorder_prediction; Formation of apoptosome; L domain-like; LEUCINE-RICH REPEAT-CONTAINING PROTEIN; Leu-rich_rpt; LRR; LRR_dom_sf; NB-ARC; Neutrophil degranulation; P-loop containing nucleoside triphosphate hydrolases; P-loop_NTPase; protein binding; RX-CC_like; SUBFAMILY NOT NAMED; TP53 Regulates Transcripti…	ADP binding; protein binding	GO:0005515; GO:0043531
RC1G0057100	mRNA:RC1G0057100	Rosa chinensis	mRNA	Rosa chinensis Whole Genome v1.0 Assembly & Annotation	Chr01	7250515	7253199	Chr01:7250515..7253199	AT3G14470.1 | Symbols: | NB-ARC domain-containing disease resistance protein | chr3:4857940-4861104 FORWARD LENGTH=1054; PREDICTED: putative disease resistance RPP13-like protein 1 [Fragaria vesca subsp. vesca]; Putative disease resistance RPP13-like protein 1 OS=Arabidopsis thaliana GN=RPPL1 PE=3 SV=1; tr|M5XHK4|M5XHK4_PRUPE Uncharacterized protein OS=Prunus persica GN=PRUPE_ppa024377mg PE=3 SV=1	Activation of caspases through apoptosome-mediated cleavage; ADP binding; Coil; DISEASERSIST; Formation of apoptosome; L domain-like; LEUCINE-RICH REPEAT-CONTAINING PROTEIN; Leu-rich_rpt; LRR; LRR_dom_sf; NB-ARC; Neutrophil degranulation; P-loop containing nucleoside triphosphate hydrolases; P-loop_NTPase; protein binding; SUBFAMILY NOT NAMED; TP53 Regulates Transcription of Caspase Activators an…	ADP binding; protein binding	GO:0005515; GO:0043531
RC1G0057400	mRNA:RC1G0057400	Rosa chinensis	mRNA	Rosa chinensis Whole Genome v1.0 Assembly & Annotation	Chr01	7348754	7351644	Chr01:7348754..7351644	AT3G14470.1 | Symbols: | NB-ARC domain-containing disease resistance protein | chr3:4857940-4861104 FORWARD LENGTH=1054; PREDICTED: putative disease resistance RPP13-like protein 1 [Fragaria vesca subsp. vesca] &gt;gi|764603706|ref|XP_004303061.2| PREDICTED: putative disease resistance RPP13-like protein 1 [Fragaria vesca subsp. vesca]; Putative disease resistance RPP13-like protein 1 OS=Arabidop…	Activation of caspases through apoptosome-mediated cleavage; ADP binding; Coil; DISEASERSIST; Formation of apoptosome; L domain-like; LEUCINE-RICH REPEAT-CONTAINING PROTEIN; Leu-rich_rpt; LRR; LRR_dom_sf; NB-ARC; Neutrophil degranulation; P-loop containing nucleoside triphosphate hydrolases; P-loop_NTPase; protein binding; RX-CC_like; SUBFAMILY NOT NAMED; TP53 Regulates Transcription of Caspase A…	ADP binding; protein binding	GO:0005515; GO:0043531
RC1G0057600	mRNA:RC1G0057600	Rosa chinensis	mRNA	Rosa chinensis Whole Genome v1.0 Assembly & Annotation	Chr01	7392967	7394847	Chr01:7392967..7394847	AT3G14470.1 | Symbols: | NB-ARC domain-containing disease resistance protein | chr3:4857940-4861104 FORWARD LENGTH=1054; PREDICTED: putative disease resistance RPP13-like protein 1 [Fragaria vesca subsp. vesca]; Putative disease resistance RPP13-like protein 1 OS=Arabidopsis thaliana GN=RPPL1 PE=3 SV=1; tr|M5XHK4|M5XHK4_PRUPE Uncharacterized protein OS=Prunus persica GN=PRUPE_ppa024377mg PE=3 SV=1	Activation of caspases through apoptosome-mediated cleavage; ADP binding; DISEASERSIST; Formation of apoptosome; L domain-like; LEUCINE-RICH REPEAT-CONTAINING PROTEIN; Leu-rich_rpt; LRR; LRR_dom_sf; NB-ARC; Neutrophil degranulation; P-loop containing nucleoside triphosphate hydrolases; P-loop_NTPase; protein binding; SUBFAMILY NOT NAMED; TP53 Regulates Transcription of Caspase Activators and Casp…	ADP binding; protein binding	GO:0005515; GO:0043531
RC1G0058400	mRNA:RC1G0058400	Rosa chinensis	mRNA	Rosa chinensis Whole Genome v1.0 Assembly & Annotation	Chr01	7428185	7430103	Chr01:7428185..7430103	AT3G14460.1 | Symbols: | LRR and NB-ARC domains-containing disease resistance protein | chr3:4851990-4856264 REVERSE LENGTH=1424; PREDICTED: putative disease resistance RPP13-like protein 1 [Fragaria vesca subsp. vesca] &gt;gi|764603706|ref|XP_004303061.2| PREDICTED: putative disease resistance RPP13-like protein 1 [Fragaria vesca subsp. vesca]; Putative disease resistance protein At3g14460 OS=Ar…	L domain-like; LEUCINE-RICH REPEAT-CONTAINING PROTEIN; LRR_dom_sf; SUBFAMILY NOT NAMED
RC1G0058500	mRNA:RC1G0058500	Rosa chinensis	mRNA	Rosa chinensis Whole Genome v1.0 Assembly & Annotation	Chr01	7430559	7433431	Chr01:7430559..7433431	AT3G14470.1 | Symbols: | NB-ARC domain-containing disease resistance protein | chr3:4857940-4861104 FORWARD LENGTH=1054; PREDICTED: putative disease resistance RPP13-like protein 1 [Fragaria vesca subsp. vesca] &gt;gi|764603706|ref|XP_004303061.2| PREDICTED: putative disease resistance RPP13-like protein 1 [Fragaria vesca subsp. vesca]; Putative disease resistance RPP13-like protein 1 OS=Arabidop…	Activation of caspases through apoptosome-mediated cleavage; ADP binding; Coil; DISEASERSIST; Formation of apoptosome; L domain-like; LEUCINE-RICH REPEAT-CONTAINING PROTEIN; LRR_dom_sf; NB-ARC; Neutrophil degranulation; P-loop containing nucleoside triphosphate hydrolases; P-loop_NTPase; RX-CC_like; SUBFAMILY NOT NAMED; TP53 Regulates Transcription of Caspase Activators and Caspases; Transcriptio…	ADP binding	GO:0043531
RC1G0060200	mRNA:RC1G0060200	Rosa chinensis	mRNA	Rosa chinensis Whole Genome v1.0 Assembly & Annotation	Chr01	7583456	7586325	Chr01:7583456..7586325	AT3G14470.1 | Symbols: | NB-ARC domain-containing disease resistance protein | chr3:4857940-4861104 FORWARD LENGTH=1054; PREDICTED: putative disease resistance RPP13-like protein 1 [Fragaria vesca subsp. vesca] &gt;gi|764603706|ref|XP_004303061.2| PREDICTED: putative disease resistance RPP13-like protein 1 [Fragaria vesca subsp. vesca]; Putative disease resistance RPP13-like protein 1 OS=Arabidop…	Activation of caspases through apoptosome-mediated cleavage; ADP binding; DISEASERSIST; Formation of apoptosome; L domain-like; LEUCINE-RICH REPEAT-CONTAINING PROTEIN; Leu-rich_rpt; LRR; LRR_dom_sf; NB-ARC; Neutrophil degranulation; P-loop containing nucleoside triphosphate hydrolases; P-loop_NTPase; protein binding; RX-CC_like; SUBFAMILY NOT NAMED; TP53 Regulates Transcription of Caspase Activat…	ADP binding; protein binding	GO:0005515; GO:0043531
RC1G0061100	mRNA:RC1G0061100	Rosa chinensis	mRNA	Rosa chinensis Whole Genome v1.0 Assembly & Annotation	Chr01	7626425	7629494	Chr01:7626425..7629494	AT3G14470.1 | Symbols: | NB-ARC domain-containing disease resistance protein | chr3:4857940-4861104 FORWARD LENGTH=1054; PREDICTED: putative disease resistance RPP13-like protein 1 [Fragaria vesca subsp. vesca] &gt;gi|764603706|ref|XP_004303061.2| PREDICTED: putative disease resistance RPP13-like protein 1 [Fragaria vesca subsp. vesca]; Putative disease resistance RPP13-like protein 1 OS=Arabidop…	Activation of caspases through apoptosome-mediated cleavage; ADP binding; DISEASERSIST; disorder_prediction; Formation of apoptosome; L domain-like; LEUCINE-RICH REPEAT-CONTAINING PROTEIN; Leu-rich_rpt; LRR; LRR_dom_sf; NB-ARC; Neutrophil degranulation; P-loop containing nucleoside triphosphate hydrolases; P-loop_NTPase; protein binding; SUBFAMILY NOT NAMED; TP53 Regulates Transcription of Caspas…	ADP binding; protein binding	GO:0005515; GO:0043531
RC1G0061500	mRNA:RC1G0061500	Rosa chinensis	mRNA	Rosa chinensis Whole Genome v1.0 Assembly & Annotation	Chr01	7642622	7645650	Chr01:7642622..7645650	AT3G14470.1 | Symbols: | NB-ARC domain-containing disease resistance protein | chr3:4857940-4861104 FORWARD LENGTH=1054; PREDICTED: putative disease resistance RPP13-like protein 1 [Fragaria vesca subsp. vesca]; Putative disease resistance RPP13-like protein 1 OS=Arabidopsis thaliana GN=RPPL1 PE=3 SV=1; tr|M5X7N9|M5X7N9_PRUPE Uncharacterized protein (Fragment) OS=Prunus persica GN=PRUPE_ppa015461…	Coil; LEUCINE-RICH REPEAT-CONTAINING PROTEIN; LRR_dom_sf; SUBFAMILY NOT NAMED
RC1G0061900	mRNA:RC1G0061900	Rosa chinensis	mRNA	Rosa chinensis Whole Genome v1.0 Assembly & Annotation	Chr01	7727136	7730004	Chr01:7727136..7730004	AT3G14470.1 | Symbols: | NB-ARC domain-containing disease resistance protein | chr3:4857940-4861104 FORWARD LENGTH=1054; PREDICTED: putative disease resistance RPP13-like protein 1 [Fragaria vesca subsp. vesca] &gt;gi|764603706|ref|XP_004303061.2| PREDICTED: putative disease resistance RPP13-like protein 1 [Fragaria vesca subsp. vesca]; Putative disease resistance RPP13-like protein 1 OS=Arabidop…	Activation of caspases through apoptosome-mediated cleavage; ADP binding; Coil; DISEASERSIST; Fer4_NifH; Formation of apoptosome; L domain-like; LEUCINE-RICH REPEAT-CONTAINING PROTEIN; Leu-rich_rpt; LRR; LRR_dom_sf; NB-ARC; Neutrophil degranulation; P-loop containing nucleoside triphosphate hydrolases; P-loop_NTPase; protein binding; RX-CC_like; SUBFAMILY NOT NAMED; TP53 Regulates Transcription o…	ADP binding; protein binding	GO:0005515; GO:0043531
RC1G0064800	mRNA:RC1G0064800	Rosa chinensis	mRNA	Rosa chinensis Whole Genome v1.0 Assembly & Annotation	Chr01	8083253	8084287	Chr01:8083253..8084287	AT3G14470.1 | Symbols: | NB-ARC domain-containing disease resistance protein | chr3:4857940-4861104 FORWARD LENGTH=1054; PREDICTED: putative disease resistance RPP13-like protein 1 [Fragaria vesca subsp. vesca] &gt;gi|764603706|ref|XP_004303061.2| PREDICTED: putative disease resistance RPP13-like protein 1 [Fragaria vesca subsp. vesca]; Putative disease resistance protein RGA3 OS=Solanum bulbocas…	AAA; Activation of caspases through apoptosome-mediated cleavage; ADP binding; DISEASERSIST; Formation of apoptosome; LEUCINE-RICH REPEAT-CONTAINING PROTEIN; NB-ARC; Neutrophil degranulation; P-loop containing nucleoside triphosphate hydrolases; P-loop_NTPase; RX-CC_like; SUBFAMILY NOT NAMED; TP53 Regulates Transcription of Caspase Activators and Caspases; Transcriptional Regulation by E2F6	ADP binding	GO:0043531
RC1G0065100	mRNA:RC1G0065100	Rosa chinensis	mRNA	Rosa chinensis Whole Genome v1.0 Assembly & Annotation	Chr01	8093958	8095936	Chr01:8093958..8095936	AT3G14460.1 | Symbols: | LRR and NB-ARC domains-containing disease resistance protein | chr3:4851990-4856264 REVERSE LENGTH=1424; FB_Mr5-like protein [Malus x robusta]; Putative disease resistance protein At3g14460 OS=Arabidopsis thaliana GN=At3g14460 PE=3 SV=1; tr|A0A0K1L669|A0A0K1L669_9ROSA FB_Mr5-like protein OS=Malus x robusta PE=3 SV=1	L domain-like; LEUCINE-RICH REPEAT-CONTAINING PROTEIN; LRR_dom_sf; SUBFAMILY NOT NAMED
RC1G0065800	mRNA:RC1G0065800	Rosa chinensis	mRNA	Rosa chinensis Whole Genome v1.0 Assembly & Annotation	Chr01	8149862	8157268	Chr01:8149862..8157268	AT3G14470.1 | Symbols: | NB-ARC domain-containing disease resistance protein | chr3:4857940-4861104 FORWARD LENGTH=1054; Putative disease resistance RPP13-like protein 1 OS=Arabidopsis thaliana GN=RPPL1 PE=3 SV=1; putative disease resistance RPP13-like protein 1 [Prunus persica]; tr|M5XHK4|M5XHK4_PRUPE Uncharacterized protein OS=Prunus persica GN=PRUPE_ppa024377mg PE=3 SV=1	Activation of caspases through apoptosome-mediated cleavage; ADP binding; DISEASERSIST; Formation of apoptosome; L domain-like; LEUCINE-RICH REPEAT-CONTAINING PROTEIN; Leu-rich_rpt; LRR; LRR_dom_sf; NB-ARC; Neutrophil degranulation; P-loop containing nucleoside triphosphate hydrolases; P-loop_NTPase; protein binding; Rcpt_L-dom_sf; RNI-like; RX-CC_like; SUBFAMILY NOT NAMED; TP53 Regulates Transcr…	ADP binding; protein binding	GO:0005515; GO:0043531
RC1G0085300	mRNA:RC1G0085300	Rosa chinensis	mRNA	Rosa chinensis Whole Genome v1.0 Assembly & Annotation	Chr01	10436937	10439990	Chr01:10436937..10439990	AT3G14470.1 | Symbols: | NB-ARC domain-containing disease resistance protein | chr3:4857940-4861104 FORWARD LENGTH=1054; PREDICTED: putative disease resistance RPP13-like protein 1 [Fragaria vesca subsp. vesca]; Putative disease resistance RPP13-like protein 1 OS=Arabidopsis thaliana GN=RPPL1 PE=3 SV=1; tr|M5X7F6|M5X7F6_PRUPE Uncharacterized protein OS=Prunus persica GN=PRUPE_ppa021061mg PE=3 SV=1	L domain-like; LEUCINE-RICH REPEAT-CONTAINING PROTEIN; LRR_dom_sf; SUBFAMILY NOT NAMED; WH-like_DNA-bd_sf
RC1G0085400	mRNA:RC1G0085400	Rosa chinensis	mRNA	Rosa chinensis Whole Genome v1.0 Assembly & Annotation	Chr01	10447113	10448257	Chr01:10447113..10448257	AT3G14470.1 | Symbols: | NB-ARC domain-containing disease resistance protein | chr3:4857940-4861104 FORWARD LENGTH=1054; PREDICTED: putative disease resistance RPP13-like protein 1 [Fragaria vesca subsp. vesca]; Putative disease resistance RPP13-like protein 1 OS=Arabidopsis thaliana GN=RPPL1 PE=3 SV=1; tr|M5X7F6|M5X7F6_PRUPE Uncharacterized protein OS=Prunus persica GN=PRUPE_ppa021061mg PE=3 SV=1	Activation of caspases through apoptosome-mediated cleavage; ADP binding; DISEASERSIST; Formation of apoptosome; LEUCINE-RICH REPEAT-CONTAINING PROTEIN; NB-ARC; Neutrophil degranulation; P-loop containing nucleoside triphosphate hydrolases; P-loop_NTPase; SUBFAMILY NOT NAMED; TP53 Regulates Transcription of Caspase Activators and Caspases; Transcriptional Regulation by E2F6	ADP binding	GO:0043531
RC1G0011900	mRNA:RC1G0011900	Rosa chinensis	mRNA	Rosa chinensis Whole Genome v1.0 Assembly & Annotation	Chr01	1713080	1713878	Chr01:1713080..1713878	60S ribosomal protein L31 [Morus notabilis] &gt;gi|587850538|gb|EXB40715.1| 60S ribosomal protein L31 [Morus notabilis]; 60S ribosomal protein L31 OS=Perilla frutescens GN=RPL31 PE=2 SV=1; AT2G19740.1 | Symbols: | Ribosomal protein L31e family protein | chr2:8513577-8514346 FORWARD LENGTH=119; tr|W9QLN8|W9QLN8_9ROSA 60S ribosomal protein L31 OS=Morus notabilis GN=L484_007298 PE=4 SV=1	60S RIBOSOMAL PROTEIN L31; Eukaryotic Translation Termination; Formation of a pool of free 40S subunits; GTP hydrolysis and joining of the 60S ribosomal subunit; intracellular; L13a-mediated translational silencing of Ceruloplasmin expression; Major pathway of rRNA processing in the nucleolus and cytosol; Nonsense Mediated Decay (NMD) enhanced by the Exon Junction Complex (EJC); Nonsense Mediated…	intracellular; ribosome; structural constituent of ribosome; translation	GO:0003735; GO:0005622; GO:0005840; GO:0006412
RC1G0034100	mRNA:RC1G0034100	Rosa chinensis	mRNA	Rosa chinensis Whole Genome v1.0 Assembly & Annotation	Chr01	4504916	4505747	Chr01:4504916..4505747	40S ribosomal protein S15a-1 OS=Arabidopsis thaliana GN=RPS15AA PE=2 SV=2; AT5G59850.1 | Symbols: | Ribosomal protein S8 family protein | chr5:24112499-24113084 REVERSE LENGTH=130; tr|T1LHD1|T1LHD1_TRIUA Uncharacterized protein OS=Triticum urartu PE=3 SV=1; uncharacterized protein LOC102577793 [Solanum tuberosum] &gt;gi|357125783|ref|XP_003564569.1| PREDICTED: 40S ribosomal protein S15a-1 [Brachy…	40S RIBOSOMAL PROTEIN S15A; Eukaryotic Translation Termination; Formation of a pool of free 40S subunits; Formation of the ternary complex, and subsequently, the 43S complex; GTP hydrolysis and joining of the 60S ribosomal subunit; L13a-mediated translational silencing of Ceruloplasmin expression; Major pathway of rRNA processing in the nucleolus and cytosol; Nonsense Mediated Decay (NMD) enhance…	ribosome; structural constituent of ribosome; translation	GO:0003735; GO:0005840; GO:0006412
RC1G0037800	mRNA:RC1G0037800	Rosa chinensis	mRNA	Rosa chinensis Whole Genome v1.0 Assembly & Annotation	Chr01	4895577	4899678	Chr01:4895577..4899678	50S ribosomal protein L1, chloroplastic OS=Arabidopsis thaliana GN=RPL1 PE=1 SV=1; AT3G63490.1 | Symbols: | Ribosomal protein L1p/L10e family | chr3:23444269-23446020 FORWARD LENGTH=346; PREDICTED: 50S ribosomal protein L1, chloroplastic [Fragaria vesca subsp. vesca]; tr|M5X1N4|M5X1N4_PRUPE Ribosomal protein OS=Prunus persica GN=PRUPE_ppa007797mg PE=3 SV=1	39S RIBOSOMAL PROTEIN L1, MITOCHONDRIAL; disorder_prediction; Eukaryotic Translation Termination; Formation of a pool of free 40S subunits; GTP hydrolysis and joining of the 60S ribosomal subunit; L13a-mediated translational silencing of Ceruloplasmin expression; large ribosomal subunit; Major pathway of rRNA processing in the nucleolus and cytosol; Nonsense Mediated Decay (NMD) enhanced by the E…	large ribosomal subunit; RNA binding; structural constituent of ribosome; translation	GO:0003723; GO:0003735; GO:0006412; GO:0015934
RC1G0038400	mRNA:RC1G0038400	Rosa chinensis	mRNA	Rosa chinensis Whole Genome v1.0 Assembly & Annotation	Chr01	5009046	5014184	Chr01:5009046..5014184	40S ribosomal protein S20-2 OS=Arabidopsis thaliana GN=RPS20B PE=2 SV=1; AT3G47370.3 | Symbols: | Ribosomal protein S10p/S20e family protein | chr3:17453671-17454437 REVERSE LENGTH=122; PREDICTED: 40S ribosomal protein S20-1 [Ricinus communis] &gt;gi|223550037|gb|EEF51524.1| 40S ribosomal protein S20, putative [Ricinus communis]; tr|B9R9P7|B9R9P7_RICCO 40S ribosomal protein S20, putative OS=Ricin…	30S RIBOSOMAL PROTEIN S10 FAMILY MEMBER; Eukaryotic Translation Termination; Formation of a pool of free 40S subunits; Formation of the ternary complex, and subsequently, the 43S complex; GTP hydrolysis and joining of the 60S ribosomal subunit; intracellular; L13a-mediated translational silencing of Ceruloplasmin expression; Major pathway of rRNA processing in the nucleolus and cytosol; Nonsense …	intracellular; ribosome; RNA binding; structural constituent of ribosome; translation	GO:0003723; GO:0003735; GO:0005622; GO:0005840; GO:0006412
RC1G0051500	mRNA:RC1G0051500	Rosa chinensis	mRNA	Rosa chinensis Whole Genome v1.0 Assembly & Annotation	Chr01	6562411	6562915	Chr01:6562411..6562915	60S ribosomal protein L31 OS=Perilla frutescens GN=RPL31 PE=2 SV=1; AT2G19740.1 | Symbols: | Ribosomal protein L31e family protein | chr2:8513577-8514346 FORWARD LENGTH=119; PREDICTED: 60S ribosomal protein L31-like [Fragaria vesca subsp. vesca]; tr|M5XE71|M5XE71_PRUPE Uncharacterized protein OS=Prunus persica GN=PRUPE_ppa013450mg PE=4 SV=1	60S RIBOSOMAL PROTEIN L31; Eukaryotic Translation Termination; Formation of a pool of free 40S subunits; GTP hydrolysis and joining of the 60S ribosomal subunit; L13a-mediated translational silencing of Ceruloplasmin expression; Major pathway of rRNA processing in the nucleolus and cytosol; Nonsense Mediated Decay (NMD) enhanced by the Exon Junction Complex (EJC); Nonsense Mediated Decay (NMD) in…	ribosome; structural constituent of ribosome; translation	GO:0003735; GO:0005840; GO:0006412
RC1G0053200	mRNA:RC1G0053200	Rosa chinensis	mRNA	Rosa chinensis Whole Genome v1.0 Assembly & Annotation	Chr01	6759652	6760994	Chr01:6759652..6760994	40S ribosomal protein S15a-1 OS=Arabidopsis thaliana GN=RPS15AA PE=2 SV=2; AT5G59850.1 | Symbols: | Ribosomal protein S8 family protein | chr5:24112499-24113084 REVERSE LENGTH=130; tr|B9HM61|B9HM61_POPTR Wrp15a family protein OS=Populus trichocarpa GN=POPTR_0008s05190g PE=3 SV=1; wrp15a family protein [Populus trichocarpa] &gt;gi|222851894|gb|EEE89441.1| wrp15a family protein [Populus trichocarpa]	40S RIBOSOMAL PROTEIN S15A; Eukaryotic Translation Termination; Formation of a pool of free 40S subunits; Formation of the ternary complex, and subsequently, the 43S complex; GTP hydrolysis and joining of the 60S ribosomal subunit; L13a-mediated translational silencing of Ceruloplasmin expression; Major pathway of rRNA processing in the nucleolus and cytosol; Nonsense Mediated Decay (NMD) enhance…	ribosome; structural constituent of ribosome; translation	GO:0003735; GO:0005840; GO:0006412
RC1G0062300	mRNA:RC1G0062300	Rosa chinensis	mRNA	Rosa chinensis Whole Genome v1.0 Assembly & Annotation	Chr01	7807536	7810226	Chr01:7807536..7810226	AT3G22300.1 | Symbols: RPS10 | ribosomal protein S10 | chr3:7885737-7886613 FORWARD LENGTH=241; hypothetical protein PRUPE_4G282300 [Prunus persica]; Ribosomal protein S10, mitochondrial OS=Pisum sativum GN=RPS10 PE=2 SV=1; tr|M5X332|M5X332_PRUPE Uncharacterized protein OS=Prunus persica GN=PRUPE_ppa013721mg PE=4 SV=1	30S RIBOSOMAL PROTEIN S10 FAMILY MEMBER; 40S RIBOSOMAL PROTEIN S10, MITOCHONDRIAL; Eukaryotic Translation Termination; Formation of a pool of free 40S subunits; Formation of the ternary complex, and subsequently, the 43S complex; GTP hydrolysis and joining of the 60S ribosomal subunit; L13a-mediated translational silencing of Ceruloplasmin expression; Major pathway of rRNA processing in the nucle…	ribosome; structural constituent of ribosome; translation	GO:0003735; GO:0005840; GO:0006412
RC1G0068600	mRNA:RC1G0068600	Rosa chinensis	mRNA	Rosa chinensis Whole Genome v1.0 Assembly & Annotation	Chr01	8555886	8557600	Chr01:8555886..8557600	AT3G54490.1 | Symbols: RPB5E | RNA polymerase II fifth largest subunit, E | chr3:20173673-20175297 FORWARD LENGTH=233; DNA-directed RNA polymerase V subunit 5C OS=Arabidopsis thaliana GN=NRPE5C PE=2 SV=1; PREDICTED: DNA-directed RNA polymerase V subunit 5C [Fragaria vesca subsp. vesca]; tr|M5XLD8|M5XLD8_PRUPE Uncharacterized protein (Fragment) OS=Prunus persica GN=PRUPE_ppa018371mg PE=4 SV=1	Abortive elongation of HIV-1 transcript in the absence of Tat; Activation of anterior HOX genes in hindbrain development during early embryogenesis; B-WICH complex positively regulates rRNA expression; Cytosolic sensors of pathogen-associated DNA; DNA binding; DNA-directed 5'-3' RNA polymerase activity; DNA-DIRECTED RNA POLYMERASES I, II, AND III SUBUNIT RPABC1; DNA-DIRECTED RNA POLYMERASE V SUBU…	DNA binding; DNA-directed RNA polymerase activity; nucleus; transcription, DNA-dependent	GO:0003677; GO:0003899; GO:0005634; GO:0006351
RC1G0069000	mRNA:RC1G0069000	Rosa chinensis	mRNA	Rosa chinensis Whole Genome v1.0 Assembly & Annotation	Chr01	8609389	8612557	Chr01:8609389..8612557	AT3G54490.1 | Symbols: RPB5E | RNA polymerase II fifth largest subunit, E | chr3:20173673-20175297 FORWARD LENGTH=233; DNA-directed RNA polymerase V subunit 5C OS=Arabidopsis thaliana GN=NRPE5C PE=2 SV=1; PREDICTED: DNA-directed RNA polymerase V subunit 5C [Fragaria vesca subsp. vesca]; tr|M5XLD8|M5XLD8_PRUPE Uncharacterized protein (Fragment) OS=Prunus persica GN=PRUPE_ppa018371mg PE=4 SV=1	Abortive elongation of HIV-1 transcript in the absence of Tat; Activation of anterior HOX genes in hindbrain development during early embryogenesis; B-WICH complex positively regulates rRNA expression; Cytosolic sensors of pathogen-associated DNA; DNA binding; DNA-directed 5'-3' RNA polymerase activity; DNA-DIRECTED RNA POLYMERASES I, II, AND III SUBUNIT RPABC1; DNA-DIRECTED RNA POLYMERASE V SUBU…	DNA binding; DNA-directed RNA polymerase activity; nucleus; transcription, DNA-dependent	GO:0003677; GO:0003899; GO:0005634; GO:0006351
RC1G0084100	mRNA:RC1G0084100	Rosa chinensis	mRNA	Rosa chinensis Whole Genome v1.0 Assembly & Annotation	Chr01	10320651	10322315	Chr01:10320651..10322315	60S ribosomal protein L28-1 OS=Arabidopsis thaliana GN=RPL28A PE=1 SV=1; AT2G19730.3 | Symbols: | Ribosomal L28e protein family | chr2:8511752-8512995 FORWARD LENGTH=143; PREDICTED: 60S ribosomal protein L28-1-like [Fragaria vesca subsp. vesca]; tr|M5X460|M5X460_PRUPE Uncharacterized protein OS=Prunus persica GN=PRUPE_ppa012887mg PE=4 SV=1	60S RIBOSOMAL PROTEIN L28; Eukaryotic Translation Termination; Formation of a pool of free 40S subunits; GTP hydrolysis and joining of the 60S ribosomal subunit; intracellular; L13a-mediated translational silencing of Ceruloplasmin expression; L28e/Mak16; Major pathway of rRNA processing in the nucleolus and cytosol; Nonsense Mediated Decay (NMD) enhanced by the Exon Junction Complex (EJC); Nonse…	intracellular; ribosome; structural constituent of ribosome; translation	GO:0003735; GO:0005622; GO:0005840; GO:0006412
RC1G0088100	mRNA:RC1G0088100	Rosa chinensis	mRNA	Rosa chinensis Whole Genome v1.0 Assembly & Annotation	Chr01	10879274	10879471	Chr01:10879274..10879471	40S ribosomal protein S28 OS=Zea mays GN=RPS28 PE=3 SV=1; AT5G03850.1 | Symbols: | Nucleic acid-binding, OB-fold-like protein | chr5:1028542-1028736 REVERSE LENGTH=64; hypothetical protein VIGAN_08344000, partial [Vigna angularis var. angularis]; tr|A0A0S3SUH5|A0A0S3SUH5_PHAAN Uncharacterized protein (Fragment) OS=Vigna angularis var. angularis GN=Vigan.08G344000 PE=3 SV=1	40S RIBOSOMAL PROTEIN S28; 40S RIBOSOMAL PROTEIN S28-1-RELATED; Eukaryotic Translation Termination; Formation of a pool of free 40S subunits; Formation of the ternary complex, and subsequently, the 43S complex; GTP hydrolysis and joining of the 60S ribosomal subunit; intracellular; L13a-mediated translational silencing of Ceruloplasmin expression; Major pathway of rRNA processing in the nucleolus…	intracellular; ribosome; structural constituent of ribosome; translation	GO:0003735; GO:0005622; GO:0005840; GO:0006412
RC1G0093900	mRNA:RC1G0093900	Rosa chinensis	mRNA	Rosa chinensis Whole Genome v1.0 Assembly & Annotation	Chr01	11619652	11620263	Chr01:11619652..11620263	40S ribosomal protein S15a-1 OS=Arabidopsis thaliana GN=RPS15AA PE=2 SV=2; AT5G59850.1 | Symbols: | Ribosomal protein S8 family protein | chr5:24112499-24113084 REVERSE LENGTH=130; hypothetical protein BRADI_2g54450 [Brachypodium distachyon]; tr|I1HT74|I1HT74_BRADI Uncharacterized protein OS=Brachypodium distachyon GN=LOC100837242 PE=4 SV=1	40S RIBOSOMAL PROTEIN S15A; Eukaryotic Translation Termination; Formation of a pool of free 40S subunits; Formation of the ternary complex, and subsequently, the 43S complex; GTP hydrolysis and joining of the 60S ribosomal subunit; L13a-mediated translational silencing of Ceruloplasmin expression; Major pathway of rRNA processing in the nucleolus and cytosol; Nonsense Mediated Decay (NMD) enhance…	ribosome; structural constituent of ribosome; translation	GO:0003735; GO:0005840; GO:0006412
RC1G0038200	mRNA:RC1G0038200	Rosa chinensis	mRNA	Rosa chinensis Whole Genome v1.0 Assembly & Annotation	Chr01	4997244	5004392	Chr01:4997244..5004392	AT5G17680.1 | Symbols: | disease resistance protein (TIR-NBS-LRR class), putative | chr5:5822999-5827153 FORWARD LENGTH=1294; TMV resistance protein N OS=Nicotiana glutinosa GN=N PE=1 SV=1; tr|E6YCZ5|E6YCZ5_9ROSA Nematode resistance-like protein OS=Prunus cerasifera PE=4 SV=1; uncharacterized protein LOC18770445 [Prunus persica]	Activation of caspases through apoptosome-mediated cleavage; ADP binding; DISEASERSIST; Formation of apoptosome; L domain-like; LRR_dom_sf; NB-ARC; Neutrophil degranulation; P-loop containing nucleoside triphosphate hydrolases; P-loop_NTPase; protein binding; &quot;Winged helix&quot; DNA-binding domain; signal transduction; TIR; TIR_dom; Toll/Interleukin receptor TIR domain; Toll_tir_struct_dom_s…	ADP binding; protein binding; signal transduction	GO:0005515; GO:0007165; GO:0043531
RC1G0047800	mRNA:RC1G0047800	Rosa chinensis	mRNA	Rosa chinensis Whole Genome v1.0 Assembly & Annotation	Chr01	6142503	6143561	Chr01:6142503..6143561	AT1G69550.1 | Symbols: | disease resistance protein (TIR-NBS-LRR class) | chr1:26148836-26153374 REVERSE LENGTH=1400; PREDICTED: probable WRKY transcription factor 19 [Fragaria vesca subsp. vesca] &gt;gi|764570338|ref|XP_011462540.1| PREDICTED: probable WRKY transcription factor 19 [Fragaria vesca subsp. vesca]; Protein SUPPRESSOR OF npr1-1, CONSTITUTIVE 1 OS=Arabidopsis thaliana GN=SNC1 PE=1 SV=…	LEUCINE-RICH REPEAT-CONTAINING PROTEIN; Leu-rich_rpt; LRR_1; LRR_dom_sf; protein binding; RNI-like; SUBFAMILY NOT NAMED	protein binding	GO:0005515
RC1G0048300	mRNA:RC1G0048300	Rosa chinensis	mRNA	Rosa chinensis Whole Genome v1.0 Assembly & Annotation	Chr01	6225812	6231391	Chr01:6225812..6231391	AT5G36930.1 | Symbols: | Disease resistance protein (TIR-NBS-LRR class) family | chr5:14567771-14571907 REVERSE LENGTH=1188; TMV resistance protein N-like isoform X1 [Arachis duranensis]; tr|M5VMP9|M5VMP9_PRUPE Uncharacterized protein OS=Prunus persica GN=PRUPE_ppa000577mg PE=4 SV=1	LEUCINE-RICH REPEAT-CONTAINING PROTEIN; SUBFAMILY NOT NAMED
RC1G0048400	mRNA:RC1G0048400	Rosa chinensis	mRNA	Rosa chinensis Whole Genome v1.0 Assembly & Annotation	Chr01	6238355	6239739	Chr01:6238355..6239739	AT4G11170.1 | Symbols: | Disease resistance protein (TIR-NBS-LRR class) family | chr4:6811127-6817130 FORWARD LENGTH=1095; Chain A, Crysal Structure Of The Tir Domain From The Muscadinia Rotundifolia Disease Resistance Protein Rpv1 &gt;gi|1147220209|pdb|5KU7|B Chain B, Crysal Structure Of The Tir Domain From The Muscadinia Rotundifolia Disease Resistance Protein Rpv1; Putative disease resistance …	FAMILY NOT NAMED; protein binding; signal transduction; TIR; TIR_dom; Toll/Interleukin receptor TIR domain; Toll_tir_struct_dom_sf	protein binding; signal transduction	GO:0005515; GO:0007165
RC1G0051000	mRNA:RC1G0051000	Rosa chinensis	mRNA	Rosa chinensis Whole Genome v1.0 Assembly & Annotation	Chr01	6476335	6476923	Chr01:6476335..6476923	AT1G63730.1 | Symbols: | Disease resistance protein (TIR-NBS-LRR class) family | chr1:23641770-23645132 FORWARD LENGTH=966; Disease resistance protein RML1A OS=Arabidopsis thaliana GN=RLM1A PE=4 SV=1; disease resistance protein (TIR-NBS-LRR class), putative [Medicago truncatula] &gt;gi|657373060|gb|KEH18830.1| disease resistance protein (TIR-NBS-LRR class), putative [Medicago truncatula]; tr|A0A0…
RC1G0057000	mRNA:RC1G0057000	Rosa chinensis	mRNA	Rosa chinensis Whole Genome v1.0 Assembly & Annotation	Chr01	7246769	7250257	Chr01:7246769..7250257	AT3G25510.1 | Symbols: | disease resistance protein (TIR-NBS-LRR class), putative | chr3:9260838-9268797 REVERSE LENGTH=1981; PREDICTED: putative disease resistance RPP13-like protein 1 [Pyrus x bretschneideri]; tr|M5VYF9|M5VYF9_PRUPE Uncharacterized protein (Fragment) OS=Prunus persica GN=PRUPE_ppa025265mg PE=4 SV=1	L domain-like; LEUCINE-RICH REPEAT-CONTAINING PROTEIN; LRR_dom_sf; SUBFAMILY NOT NAMED
RC1G0064300	mRNA:RC1G0064300	Rosa chinensis	mRNA	Rosa chinensis Whole Genome v1.0 Assembly & Annotation	Chr01	8054123	8056050	Chr01:8054123..8056050	AT5G17680.1 | Symbols: | disease resistance protein (TIR-NBS-LRR class), putative | chr5:5822999-5827153 FORWARD LENGTH=1294; PREDICTED: TMV resistance protein N-like [Fragaria vesca subsp. vesca]; TMV resistance protein N OS=Nicotiana glutinosa GN=N PE=1 SV=1; tr|A0PFR6|A0PFR6_ROSHC Putative NBS-LRR resistance protein (Fragment) OS=Rosa hybrid cultivar GN=brp PE=4 SV=1	AAA; Activation of caspases through apoptosome-mediated cleavage; ADP binding; DISEASERSIST; Formation of apoptosome; LEUCINE-RICH REPEAT-CONTAINING PROTEIN; NB-ARC; Neutrophil degranulation; P-loop containing nucleoside triphosphate hydrolases; P-loop_NTPase; protein binding; &quot;Winged helix&quot; DNA-binding domain; signal transduction; TIR; TIR_dom; Toll/Interleukin receptor TIR domain; Tol…	ADP binding; protein binding; signal transduction	GO:0005515; GO:0007165; GO:0043531
RC1G0069700	mRNA:RC1G0069700	Rosa chinensis	mRNA	Rosa chinensis Whole Genome v1.0 Assembly & Annotation	Chr01	8703984	8706776	Chr01:8703984..8706776	AT5G17680.1 | Symbols: | disease resistance protein (TIR-NBS-LRR class), putative | chr5:5822999-5827153 FORWARD LENGTH=1294; PREDICTED: TMV resistance protein N-like [Fragaria vesca subsp. vesca]; TMV resistance protein N OS=Nicotiana glutinosa GN=N PE=1 SV=1; tr|V4TYG7|V4TYG7_9ROSI Uncharacterized protein OS=Citrus clementina GN=CICLE_v10023938mg PE=4 SV=1	AAA; Activation of caspases through apoptosome-mediated cleavage; ADP binding; DISEASERSIST; Formation of apoptosome; L domain-like; Leu-rich_rpt_3; LRR_3; LRR_dom_sf; NB-ARC; Neutrophil degranulation; P-loop containing nucleoside triphosphate hydrolases; P-loop_NTPase; TP53 Regulates Transcription of Caspase Activators and Caspases; Transcriptional Regulation by E2F6	ADP binding	GO:0043531
RC1G0071800	mRNA:RC1G0071800	Rosa chinensis	mRNA	Rosa chinensis Whole Genome v1.0 Assembly & Annotation	Chr01	8876194	8877423	Chr01:8876194..8877423	AT5G17680.1 | Symbols: | disease resistance protein (TIR-NBS-LRR class), putative | chr5:5822999-5827153 FORWARD LENGTH=1294; PREDICTED: TMV resistance protein N-like [Fragaria vesca subsp. vesca]; TMV resistance protein N OS=Nicotiana glutinosa GN=N PE=1 SV=1; tr|A0A067JPK9|A0A067JPK9_JATCU Uncharacterized protein OS=Jatropha curcas GN=JCGZ_22529 PE=4 SV=1	Activation of caspases through apoptosome-mediated cleavage; ADP binding; Formation of apoptosome; LEUCINE-RICH REPEAT-CONTAINING PROTEIN; NB-ARC; Neutrophil degranulation; P-loop containing nucleoside triphosphate hydrolases; P-loop_NTPase; &quot;Winged helix&quot; DNA-binding domain; TP53 Regulates Transcription of Caspase Activators and Caspases; Transcriptional Regulation by E2F6; WH_DNA-bd_s…	ADP binding	GO:0043531
RC1G0073000	mRNA:RC1G0073000	Rosa chinensis	mRNA	Rosa chinensis Whole Genome v1.0 Assembly & Annotation	Chr01	9011442	9012585	Chr01:9011442..9012585	AT5G45060.1 | Symbols: | Disease resistance protein (TIR-NBS-LRR class) family | chr5:18182038-18186067 FORWARD LENGTH=1165; Disease resistance protein RPS4 OS=Arabidopsis thaliana GN=RPS4 PE=1 SV=1; PREDICTED: TMV resistance protein N-like [Fragaria vesca subsp. vesca]; tr|M5W0K6|M5W0K6_PRUPE Uncharacterized protein OS=Prunus persica GN=PRUPE_ppa017840mg PE=4 SV=1	L domain-like; LEUCINE-RICH REPEAT-CONTAINING PROTEIN; Leu-rich_rpt; LRR; LRR_dom_sf; protein binding; SUBFAMILY NOT NAMED	protein binding	GO:0005515
RC1G0073500	mRNA:RC1G0073500	Rosa chinensis	mRNA	Rosa chinensis Whole Genome v1.0 Assembly & Annotation	Chr01	9041245	9043098	Chr01:9041245..9043098	AT5G17680.1 | Symbols: | disease resistance protein (TIR-NBS-LRR class), putative | chr5:5822999-5827153 FORWARD LENGTH=1294; PREDICTED: TMV resistance protein N-like [Fragaria vesca subsp. vesca]; Putative disease resistance protein At4g11170 OS=Arabidopsis thaliana GN=At4g11170 PE=2 SV=1; tr|A0PFR6|A0PFR6_ROSHC Putative NBS-LRR resistance protein (Fragment) OS=Rosa hybrid cultivar GN=brp PE=4 S…	AAA; Activation of caspases through apoptosome-mediated cleavage; ADP binding; DISEASERSIST; Formation of apoptosome; LEUCINE-RICH REPEAT-CONTAINING PROTEIN; NB-ARC; Neutrophil degranulation; P-loop containing nucleoside triphosphate hydrolases; P-loop_NTPase; protein binding; signal transduction; TIR; TIR_dom; Toll/Interleukin receptor TIR domain; Toll_tir_struct_dom_sf; TP53 Regulates Transcrip…	ADP binding; protein binding; signal transduction	GO:0005515; GO:0007165; GO:0043531
RC1G0074700	mRNA:RC1G0074700	Rosa chinensis	mRNA	Rosa chinensis Whole Genome v1.0 Assembly & Annotation	Chr01	9105776	9108923	Chr01:9105776..9108923	AT5G17680.1 | Symbols: | disease resistance protein (TIR-NBS-LRR class), putative | chr5:5822999-5827153 FORWARD LENGTH=1294; PREDICTED: TMV resistance protein N-like [Fragaria vesca subsp. vesca]; TMV resistance protein N OS=Nicotiana glutinosa GN=N PE=1 SV=1; tr|M5W0K6|M5W0K6_PRUPE Uncharacterized protein OS=Prunus persica GN=PRUPE_ppa017840mg PE=4 SV=1	FAMILY NOT NAMED; L domain-like; Leu-rich_rpt; LRR; LRR_dom_sf; protein binding	protein binding	GO:0005515
RC1G0074800	mRNA:RC1G0074800	Rosa chinensis	mRNA	Rosa chinensis Whole Genome v1.0 Assembly & Annotation	Chr01	9109406	9111181	Chr01:9109406..9111181	AT5G17680.1 | Symbols: | disease resistance protein (TIR-NBS-LRR class), putative | chr5:5822999-5827153 FORWARD LENGTH=1294; PREDICTED: TMV resistance protein N-like [Fragaria vesca subsp. vesca]; TMV resistance protein N OS=Nicotiana glutinosa GN=N PE=1 SV=1; tr|A0A067JPK9|A0A067JPK9_JATCU Uncharacterized protein OS=Jatropha curcas GN=JCGZ_22529 PE=4 SV=1	AAA; Activation of caspases through apoptosome-mediated cleavage; ADP binding; DISEASERSIST; Formation of apoptosome; L domain-like; LEUCINE-RICH REPEAT-CONTAINING PROTEIN; Leu-rich_rpt_3; LRR_3; LRR_dom_sf; NB-ARC; Neutrophil degranulation; P-loop containing nucleoside triphosphate hydrolases; P-loop_NTPase; &quot;Winged helix&quot; DNA-binding domain; TP53 Regulates Transcription of Caspase Act…	ADP binding	GO:0043531
RC1G0076000	mRNA:RC1G0076000	Rosa chinensis	mRNA	Rosa chinensis Whole Genome v1.0 Assembly & Annotation	Chr01	9337653	9338397	Chr01:9337653..9338397	AT5G17680.1 | Symbols: | disease resistance protein (TIR-NBS-LRR class), putative | chr5:5822999-5827153 FORWARD LENGTH=1294; PREDICTED: TMV resistance protein N-like [Malus domestica]; Probable WRKY transcription factor 19 OS=Arabidopsis thaliana GN=WRKY19 PE=3 SV=1; tr|M5XS57|M5XS57_PRUPE Uncharacterized protein OS=Prunus persica GN=PRUPE_ppa023967mg PE=4 SV=1	L domain-like; LEUCINE-RICH REPEAT-CONTAINING PROTEIN; Leu-rich_rpt_3; LRR_3; LRR_dom_sf; SUBFAMILY NOT NAMED
RC1G0076100	mRNA:RC1G0076100	Rosa chinensis	mRNA	Rosa chinensis Whole Genome v1.0 Assembly & Annotation	Chr01	9339190	9339812	Chr01:9339190..9339812	AT1G17600.1 | Symbols: | Disease resistance protein (TIR-NBS-LRR class) family | chr1:6053026-6056572 REVERSE LENGTH=1049; Disease resistance protein RLM3 OS=Arabidopsis thaliana GN=RLM3 PE=2 SV=1; hypothetical protein TSUD_159200 [Trifolium subterraneum]; tr|A0A072V187|A0A072V187_MEDTR Disease resistance protein (TIR-NBS-LRR class), putative OS=Medicago truncatula GN=11438935 PE=4 SV=1	LEUCINE-RICH REPEAT-CONTAINING PROTEIN; Toll/Interleukin receptor TIR domain; Toll_tir_struct_dom_sf
RC1G0077400	mRNA:RC1G0077400	Rosa chinensis	mRNA	Rosa chinensis Whole Genome v1.0 Assembly & Annotation	Chr01	9708947	9709536	Chr01:9708947..9709536	AT5G45230.1 | Symbols: | Disease resistance protein (TIR-NBS-LRR class) family | chr5:18302147-18308303 REVERSE LENGTH=1231; PREDICTED: TMV resistance protein N-like [Fragaria vesca subsp. vesca]; tr|M5VIG4|M5VIG4_PRUPE Uncharacterized protein (Fragment) OS=Prunus persica GN=PRUPE_ppa016623mg PE=4 SV=1	FAMILY NOT NAMED
RC1G0078300	mRNA:RC1G0078300	Rosa chinensis	mRNA	Rosa chinensis Whole Genome v1.0 Assembly & Annotation	Chr01	9846162	9848659	Chr01:9846162..9848659	AT4G16950.1 | Symbols: RPP5 | Disease resistance protein (TIR-NBS-LRR class) family | chr4:9539010-9544340 REVERSE LENGTH=1449; Disease resistance protein RPP5 OS=Arabidopsis thaliana GN=RPP5 PE=1 SV=1; PREDICTED: TMV resistance protein N-like [Fragaria vesca subsp. vesca]; tr|M5W0K6|M5W0K6_PRUPE Uncharacterized protein OS=Prunus persica GN=PRUPE_ppa017840mg PE=4 SV=1	FAMILY NOT NAMED
RC1G0078400	mRNA:RC1G0078400	Rosa chinensis	mRNA	Rosa chinensis Whole Genome v1.0 Assembly & Annotation	Chr01	9849832	9850591	Chr01:9849832..9850591	AT5G36930.2 | Symbols: | Disease resistance protein (TIR-NBS-LRR class) family | chr5:14567771-14571916 REVERSE LENGTH=1191; PREDICTED: TMV resistance protein N-like [Malus domestica]; tr|A0A059BPC0|A0A059BPC0_EUCGR Uncharacterized protein (Fragment) OS=Eucalyptus grandis GN=EUGRSUZ_F01322 PE=4 SV=1	LEUCINE-RICH REPEAT-CONTAINING PROTEIN; LRR_dom_sf
RC1G0078900	mRNA:RC1G0078900	Rosa chinensis	mRNA	Rosa chinensis Whole Genome v1.0 Assembly & Annotation	Chr01	9930682	9932871	Chr01:9930682..9932871	AT3G51570.1 | Symbols: | Disease resistance protein (TIR-NBS-LRR class) family | chr3:19126358-19130456 FORWARD LENGTH=1226; PREDICTED: TMV resistance protein N-like [Fragaria vesca subsp. vesca]; tr|M5XJV4|M5XJV4_PRUPE Uncharacterized protein OS=Prunus persica GN=PRUPE_ppa001315mg PE=4 SV=1	FAMILY NOT NAMED
RC1G0079000	mRNA:RC1G0079000	Rosa chinensis	mRNA	Rosa chinensis Whole Genome v1.0 Assembly & Annotation	Chr01	9933696	9934777	Chr01:9933696..9934777	AT5G36930.1 | Symbols: | Disease resistance protein (TIR-NBS-LRR class) family | chr5:14567771-14571907 REVERSE LENGTH=1188; PREDICTED: TMV resistance protein N-like [Fragaria vesca subsp. vesca]; Probable WRKY transcription factor 19 OS=Arabidopsis thaliana GN=WRKY19 PE=3 SV=1; tr|M5XS57|M5XS57_PRUPE Uncharacterized protein OS=Prunus persica GN=PRUPE_ppa023967mg PE=4 SV=1	L domain-like; LEUCINE-RICH REPEAT-CONTAINING PROTEIN; LRR_dom_sf; &quot;Winged helix&quot; DNA-binding domain; SUBFAMILY NOT NAMED; WH_DNA-bd_sf
RC1G0079100	mRNA:RC1G0079100	Rosa chinensis	mRNA	Rosa chinensis Whole Genome v1.0 Assembly & Annotation	Chr01	9935513	9936052	Chr01:9935513..9936052	AT5G46450.1 | Symbols: | Disease resistance protein (TIR-NBS-LRR class) family | chr5:18835618-18839546 FORWARD LENGTH=1123; PREDICTED: TMV resistance protein N-like [Pyrus x bretschneideri]; Putative disease resistance protein At4g11170 OS=Arabidopsis thaliana GN=At4g11170 PE=2 SV=1; tr|B9RYD1|B9RYD1_RICCO Leucine-rich repeat-containing protein, putative OS=Ricinus communis GN=RCOM_0812250 PE=4 …	LEUCINE-RICH REPEAT-CONTAINING PROTEIN; protein binding; signal transduction; SUBFAMILY NOT NAMED; TIR; TIR_dom; Toll/Interleukin receptor TIR domain; Toll_tir_struct_dom_sf	protein binding; signal transduction	GO:0005515; GO:0007165
RC1G0080400	mRNA:RC1G0080400	Rosa chinensis	mRNA	Rosa chinensis Whole Genome v1.0 Assembly & Annotation	Chr01	10039642	10040438	Chr01:10039642..10040438	AT5G45060.1 | Symbols: | Disease resistance protein (TIR-NBS-LRR class) family | chr5:18182038-18186067 FORWARD LENGTH=1165; Disease resistance protein LAZ5 OS=Arabidopsis thaliana GN=LAZ5 PE=1 SV=1; PREDICTED: TMV resistance protein N-like [Fragaria vesca subsp. vesca]; tr|B9T115|B9T115_RICCO Leucine-rich repeat-containing protein, putative OS=Ricinus communis GN=RCOM_0458060 PE=4 SV=1	FAMILY NOT NAMED
RC1G0081800	mRNA:RC1G0081800	Rosa chinensis	mRNA	Rosa chinensis Whole Genome v1.0 Assembly & Annotation	Chr01	10123045	10123821	Chr01:10123045..10123821	AT5G48770.1 | Symbols: | Disease resistance protein (TIR-NBS-LRR class) family | chr5:19773277-19777242 REVERSE LENGTH=1190; Disease resistance protein RPP5 OS=Arabidopsis thaliana GN=RPP5 PE=1 SV=1; PREDICTED: TMV resistance protein N-like [Pyrus x bretschneideri]; tr|B9RYD1|B9RYD1_RICCO Leucine-rich repeat-containing protein, putative OS=Ricinus communis GN=RCOM_0812250 PE=4 SV=1	LEUCINE-RICH REPEAT-CONTAINING PROTEIN; protein binding; signal transduction; TIR; TIR_dom; Toll/Interleukin receptor TIR domain; Toll_tir_struct_dom_sf	protein binding; signal transduction	GO:0005515; GO:0007165
RC1G0081900	mRNA:RC1G0081900	Rosa chinensis	mRNA	Rosa chinensis Whole Genome v1.0 Assembly & Annotation	Chr01	10124592	10124974	Chr01:10124592..10124974	AT5G36930.1 | Symbols: | Disease resistance protein (TIR-NBS-LRR class) family | chr5:14567771-14571907 REVERSE LENGTH=1188; tr|A5C8X3|A5C8X3_VITVI Uncharacterized protein OS=Vitis vinifera GN=VITISV_003077 PE=4 SV=1; unnamed protein product, partial [Vitis vinifera]	disorder_prediction; LEUCINE-RICH REPEAT-CONTAINING PROTEIN; LRR_dom_sf
RC1G0083600	mRNA:RC1G0083600	Rosa chinensis	mRNA	Rosa chinensis Whole Genome v1.0 Assembly & Annotation	Chr01	10278347	10278790	Chr01:10278347..10278790	AT5G36930.2 | Symbols: | Disease resistance protein (TIR-NBS-LRR class) family | chr5:14567771-14571916 REVERSE LENGTH=1191; PREDICTED: TMV resistance protein N-like [Pyrus x bretschneideri]; Probable WRKY transcription factor 19 OS=Arabidopsis thaliana GN=WRKY19 PE=3 SV=1; tr|A5AP14|A5AP14_VITVI Uncharacterized protein OS=Vitis vinifera GN=VITISV_033530 PE=4 SV=1
RC1G0084400	mRNA:RC1G0084400	Rosa chinensis	mRNA	Rosa chinensis Whole Genome v1.0 Assembly & Annotation	Chr01	10380998	10381373	Chr01:10380998..10381373	AT5G36930.2 | Symbols: | Disease resistance protein (TIR-NBS-LRR class) family | chr5:14567771-14571916 REVERSE LENGTH=1191; tr|I1MNC5|I1MNC5_SOYBN Uncharacterized protein OS=Glycine max GN=LOC100817950 PE=4 SV=2	disorder_prediction; LEUCINE-RICH REPEAT-CONTAINING PROTEIN; LRR_dom_sf
RC1G0084500	mRNA:RC1G0084500	Rosa chinensis	mRNA	Rosa chinensis Whole Genome v1.0 Assembly & Annotation	Chr01	10382322	10383290	Chr01:10382322..10383290	AT5G17680.1 | Symbols: | disease resistance protein (TIR-NBS-LRR class), putative | chr5:5822999-5827153 FORWARD LENGTH=1294; PREDICTED: TMV resistance protein N-like [Fragaria vesca subsp. vesca]; TMV resistance protein N OS=Nicotiana glutinosa GN=N PE=1 SV=1; tr|B9T115|B9T115_RICCO Leucine-rich repeat-containing protein, putative OS=Ricinus communis GN=RCOM_0458060 PE=4 SV=1	L domain-like; LEUCINE-RICH REPEAT-CONTAINING PROTEIN; Leu-rich_rpt; LRR; LRR_dom_sf; protein binding; SUBFAMILY NOT NAMED	protein binding	GO:0005515
RC1G0085800	mRNA:RC1G0085800	Rosa chinensis	mRNA	Rosa chinensis Whole Genome v1.0 Assembly & Annotation	Chr01	10516423	10522289	Chr01:10516423..10522289	AT1G72900.1 | Symbols: | Toll-Interleukin-Resistance (TIR) domain-containing protein | chr1:27432216-27433532 FORWARD LENGTH=363; TIR-NBS-LRR [Rosa rugosa]; TMV resistance protein N OS=Nicotiana glutinosa GN=N PE=1 SV=1; tr|J7FWP5|J7FWP5_ROSRU TIR-NBS-LRR OS=Rosa rugosa GN=ruRdr1C PE=4 SV=1	LEUCINE-RICH REPEAT-CONTAINING PROTEIN; protein binding; signal transduction; TIR; TIR_dom; Toll/Interleukin receptor TIR domain; Toll_tir_struct_dom_sf	protein binding; signal transduction	GO:0005515; GO:0007165
RC1G0085900	mRNA:RC1G0085900	Rosa chinensis	mRNA	Rosa chinensis Whole Genome v1.0 Assembly & Annotation	Chr01	10523368	10524032	Chr01:10523368..10524032	AT5G17680.1 | Symbols: | disease resistance protein (TIR-NBS-LRR class), putative | chr5:5822999-5827153 FORWARD LENGTH=1294; Disease resistance protein RPS6 OS=Arabidopsis thaliana GN=RPS6 PE=1 SV=1; TIR-NBS-LRR resistance protein muRdr1D [Rosa multiflora]; tr|G3MUE6|G3MUE6_ROSMU TIR-NBS-LRR resistance protein muRdr1D OS=Rosa multiflora GN=muRdr1D PE=4 SV=1	L domain-like; LEUCINE-RICH REPEAT-CONTAINING PROTEIN; LRR_dom_sf; SUBFAMILY NOT NAMED
RC1G0086000	mRNA:RC1G0086000	Rosa chinensis	mRNA	Rosa chinensis Whole Genome v1.0 Assembly & Annotation	Chr01	10524593	10526374	Chr01:10524593..10526374	TIR-NBS-LRR [Rosa rugosa]; tr|J7G2Z2|J7G2Z2_ROSRU TIR-NBS-LRR OS=Rosa rugosa GN=ruRdr1I PE=4 SV=1	Coil; disorder_prediction
RC1G0092500	mRNA:RC1G0092500	Rosa chinensis	mRNA	Rosa chinensis Whole Genome v1.0 Assembly & Annotation	Chr01	11420789	11421615	Chr01:11420789..11421615	AT1G70830.5 | Symbols: MLP28 | MLP-like protein 28 | chr1:26710203-26711395 REVERSE LENGTH=173; MLP-like protein 28 OS=Arabidopsis thaliana GN=MLP28 PE=1 SV=1; PREDICTED: LOW QUALITY PROTEIN: MLP-like protein 34 [Fragaria vesca subsp. vesca]; tr|Q9AXU0|Q9AXU0_PRUPE Major latex-like protein OS=Prunus persica GN=PRUPE_ppa012742mg PE=4 SV=1	Bet_v_1; Bet v1-like; Bet_v1-like; Bet_v_I/MLP; defense response; FAMILY NOT NAMED; MLP-LIKE PROTEIN 165-RELATED; response to biotic stimulus; START-like_dom_sf	defense response; response to biotic stimulus	GO:0006952; GO:0009607
RC1G0092600	mRNA:RC1G0092600	Rosa chinensis	mRNA	Rosa chinensis Whole Genome v1.0 Assembly & Annotation	Chr01	11429956	11430746	Chr01:11429956..11430746	AT1G70840.1 | Symbols: MLP31 | MLP-like protein 31 | chr1:26713170-26714014 REVERSE LENGTH=171; MLP-like protein 31 OS=Arabidopsis thaliana GN=MLP31 PE=2 SV=2; PREDICTED: LOW QUALITY PROTEIN: MLP-like protein 34 [Fragaria vesca subsp. vesca]; tr|M5XQB7|M5XQB7_PRUPE Uncharacterized protein OS=Prunus persica GN=PRUPE_ppa025363mg PE=4 SV=1	Bet_v_1; Bet v1-like; Bet_v1-like; Bet_v_I/MLP; defense response; FAMILY NOT NAMED; MLP-LIKE PROTEIN 165-RELATED; response to biotic stimulus; START-like_dom_sf	defense response; response to biotic stimulus	GO:0006952; GO:0009607
