# Supplementary material for: Meta-Analysis of Rose Rosette Disease-Resistant Quantitative Trait Loci and a Search for Candidate Genes
Source: Pathogens. 2023 Apr 8;12(4):575. doi: 10.3390/pathogens12040575 (PMC10146096; doi:10.3390/pathogens12040575)
Supplement: Supplementary file 1 [file pathogens-12-00575-s001.zip › TableS7.xlsx]

## Sheet: Sheet 1
Table S7. List of candidate genes discovered in the MetaRRD3.1 interval including name, location, BLAST, functional analysis (InterPro), GO term and GO accession number.qtl2_genes
Name	Unique.Name	Organism	Type	Genome.Transcriptome	Chromosome.Scaffold	Start.position	Stop.position	Location	BLAST	InterPro	GO.Term	GO.Accession
RC3G0146500	mRNA:RC3G0146500	Rosa chinensis	mRNA	Rosa chinensis Whole Genome v1.0 Assembly & Annotation	Chr03	22737522	22738574	Chr03:22737522..22738574	AT4G19050.1 | Symbols: | NB-ARC domain-containing disease resistance protein | chr4:10440102-10443786 REVERSE LENGTH=1201; PREDICTED: putative disease resistance protein At4g19050 [Fragaria vesca subsp. vesca]; Putative disease resistance protein At4g19050 OS=Arabidopsis thaliana GN=At4g19050 PE=3 SV=2; tr|M5WD34|M5WD34_PRUPE Uncharacterized protein OS=Prunus persica GN=PRUPE_ppa022304mg PE=4 SV=1	LRR_dom_sf
RC3G0137600	mRNA:RC3G0137600	Rosa chinensis	mRNA	Rosa chinensis Whole Genome v1.0 Assembly & Annotation	Chr03	21891667	21896851	Chr03:21891667..21896851	60S ribosomal protein L6-3 OS=Arabidopsis thaliana GN=RPL6C PE=2 SV=1; AT1G74050.1 | Symbols: | Ribosomal protein L6 family protein | chr1:27847256-27848680 REVERSE LENGTH=233; PREDICTED: 60S ribosomal protein L6-1-like [Fragaria vesca subsp. vesca]; tr|M5X9S3|M5X9S3_PRUPE 60S ribosomal protein L6 OS=Prunus persica GN=PRUPE_ppa010844mg PE=3 SV=1	60S_ribosomal_L6E; 60S RIBOSOMAL PROTEIN L6; disorder_prediction; Eukaryotic Translation Termination; Formation of a pool of free 40S subunits; GTP hydrolysis and joining of the 60S ribosomal subunit; intracellular; KOW_RPL6; L13a-mediated translational silencing of Ceruloplasmin expression; Major pathway of rRNA processing in the nucleolus and cytosol; Nonsense Mediated Decay (NMD) enhanced by t…	intracellular; ribosome; structural constituent of ribosome; translation	GO:0003735; GO:0005622; GO:0005840; GO:0006412
RC3G0141600	mRNA:RC3G0141600	Rosa chinensis	mRNA	Rosa chinensis Whole Genome v1.0 Assembly & Annotation	Chr03	22262796	22263224	Chr03:22262796..22263224	50S ribosomal protein L2, chloroplastic OS=Manihot esculenta GN=rpl2-A PE=3 SV=1; ATCG01310.1 | Symbols: RPL2.2 | ribosomal protein L2 | chrC:152806-154312 FORWARD LENGTH=274; hypothetical protein JCGZ_15168 [Jatropha curcas]; tr|A0A067KG04|A0A067KG04_JATCU Uncharacterized protein OS=Jatropha curcas GN=JCGZ_15168 PE=4 SV=1	disorder_prediction; Eukaryotic Translation Termination; Formation of a pool of free 40S subunits; GTP hydrolysis and joining of the 60S ribosomal subunit; intracellular; L13a-mediated translational silencing of Ceruloplasmin expression; large ribosomal subunit; Major pathway of rRNA processing in the nucleolus and cytosol; Nonsense Mediated Decay (NMD) enhanced by the Exon Junction Complex (EJC)…	intracellular; large ribosomal subunit; ribosome; RNA binding; structural constituent of ribosome; transferase activity; translation	GO:0003723; GO:0003735; GO:0005622; GO:0005840; GO:0006412; GO:0015934; GO:0016740
RC3G0151100	mRNA:RC3G0151100	Rosa chinensis	mRNA	Rosa chinensis Whole Genome v1.0 Assembly & Annotation	Chr03	23443970	23445581	Chr03:23443970..23445581	60S ribosomal protein L21-1 OS=Arabidopsis thaliana GN=RPL21A PE=2 SV=2; AT1G09690.1 | Symbols: | Translation protein SH3-like family protein | chr1:3136407-3137430 REVERSE LENGTH=164; PREDICTED: 60S ribosomal protein L21-1 [Fragaria vesca subsp. vesca]; tr|M5WAQ7|M5WAQ7_PRUPE Uncharacterized protein OS=Prunus persica GN=PRUPE_ppa012553mg PE=4 SV=1	60S RIBOSOMAL PROTEIN L21; Eukaryotic Translation Termination; Formation of a pool of free 40S subunits; GTP hydrolysis and joining of the 60S ribosomal subunit; intracellular; L13a-mediated translational silencing of Ceruloplasmin expression; Major pathway of rRNA processing in the nucleolus and cytosol; Nonsense Mediated Decay (NMD) enhanced by the Exon Junction Complex (EJC); Nonsense Mediated…	intracellular; ribosome; structural constituent of ribosome; translation	GO:0003735; GO:0005622; GO:0005840; GO:0006412
RC3G0161100	mRNA:RC3G0161100	Rosa chinensis	mRNA	Rosa chinensis Whole Genome v1.0 Assembly & Annotation	Chr03	24199960	24201966	Chr03:24199960..24201966	40S ribosomal protein S5-1 OS=Arabidopsis thaliana GN=RPS5A PE=1 SV=1; AT2G37270.2 | Symbols: ATRPS5B, RPS5B | ribosomal protein 5B | chr2:15647883-15649042 REVERSE LENGTH=207; PREDICTED: 40S ribosomal protein S5 [Fragaria vesca subsp. vesca]; tr|W9RQK6|W9RQK6_9ROSA 40S ribosomal protein S5 OS=Morus notabilis GN=L484_012437 PE=3 SV=1	40S RIBOSOMAL PROTEIN S5-1-RELATED; Eukaryotic Translation Termination; Formation of a pool of free 40S subunits; Formation of the ternary complex, and subsequently, the 43S complex; GTP hydrolysis and joining of the 60S ribosomal subunit; L13a-mediated translational silencing of Ceruloplasmin expression; Major pathway of rRNA processing in the nucleolus and cytosol; Nonsense Mediated Decay (NMD)…	RNA binding; small ribosomal subunit; structural constituent of ribosome; translation	GO:0003723; GO:0003735; GO:0006412; GO:0015935
RC3G0163100	mRNA:RC3G0163100	Rosa chinensis	mRNA	Rosa chinensis Whole Genome v1.0 Assembly & Annotation	Chr03	24337660	24339177	Chr03:24337660..24339177	40S ribosomal protein S28 OS=Zea mays GN=RPS28 PE=3 SV=1; AT5G64140.1 | Symbols: RPS28 | ribosomal protein S28 | chr5:25667529-25667723 REVERSE LENGTH=64; hypothetical protein PRUPE_7G087500, partial [Prunus persica]; tr|M5VRN2|M5VRN2_PRUPE Uncharacterized protein OS=Prunus persica GN=PRUPE_ppa013411mg PE=3 SV=1	40S RIBOSOMAL PROTEIN S28; 40S RIBOSOMAL PROTEIN S28-1-RELATED; Eukaryotic Translation Termination; Formation of a pool of free 40S subunits; Formation of the ternary complex, and subsequently, the 43S complex; GTP hydrolysis and joining of the 60S ribosomal subunit; intracellular; L13a-mediated translational silencing of Ceruloplasmin expression; Major pathway of rRNA processing in the nucleolus…	intracellular; ribosome; structural constituent of ribosome; translation	GO:0003735; GO:0005622; GO:0005840; GO:0006412
RC3G0136400	mRNA:RC3G0136400	Rosa chinensis	mRNA	Rosa chinensis Whole Genome v1.0 Assembly & Annotation	Chr03	21740920	21744430	Chr03:21740920..21744430	AT5G66900.1 | Symbols: | Disease resistance protein (CC-NBS-LRR class) family | chr5:26714931-26717757 REVERSE LENGTH=809; PREDICTED: probable disease resistance protein At5g66900 isoform X2 [Fragaria vesca subsp. vesca]; Probable disease resistance protein At5g66900 OS=Arabidopsis thaliana GN=At5g66900 PE=3 SV=1; tr|M5VW55|M5VW55_PRUPE Uncharacterized protein OS=Prunus persica GN=PRUPE_ppa102719…	Activation of caspases through apoptosome-mediated cleavage; ADP binding; Coil; DISEASERSIST; FAMILY NOT NAMED; Formation of apoptosome; LRR_dom_sf; NB-ARC; Neutrophil degranulation; P-loop containing nucleoside triphosphate hydrolases; P-loop_NTPase; Powdery_mildew-R_dom; RNI-like; RPW8; SUBFAMILY NOT NAMED; TP53 Regulates Transcription of Caspase Activators and Caspases; Transcriptional Regulat…	ADP binding	GO:0043531
RC3G0136500	mRNA:RC3G0136500	Rosa chinensis	mRNA	Rosa chinensis Whole Genome v1.0 Assembly & Annotation	Chr03	21762759	21766253	Chr03:21762759..21766253	AT5G66900.1 | Symbols: | Disease resistance protein (CC-NBS-LRR class) family | chr5:26714931-26717757 REVERSE LENGTH=809; PREDICTED: probable disease resistance protein At5g66900 isoform X2 [Fragaria vesca subsp. vesca]; Probable disease resistance protein At5g66900 OS=Arabidopsis thaliana GN=At5g66900 PE=3 SV=1; tr|M5VW55|M5VW55_PRUPE Uncharacterized protein OS=Prunus persica GN=PRUPE_ppa102719…	Activation of caspases through apoptosome-mediated cleavage; ADP binding; Coil; DISEASERSIST; FAMILY NOT NAMED; Formation of apoptosome; LRR_dom_sf; NB-ARC; Neutrophil degranulation; P-loop containing nucleoside triphosphate hydrolases; P-loop_NTPase; Powdery_mildew-R_dom; RNI-like; RPW8; SUBFAMILY NOT NAMED; TP53 Regulates Transcription of Caspase Activators and Caspases; Transcriptional Regulat…	ADP binding	GO:0043531
RC3G0136600	mRNA:RC3G0136600	Rosa chinensis	mRNA	Rosa chinensis Whole Genome v1.0 Assembly & Annotation	Chr03	21808068	21810533	Chr03:21808068..21810533	AT5G66900.1 | Symbols: | Disease resistance protein (CC-NBS-LRR class) family | chr5:26714931-26717757 REVERSE LENGTH=809; PREDICTED: probable disease resistance protein At5g66900 [Fragaria vesca subsp. vesca] &gt;gi|764514586|ref|XP_011464459.1| PREDICTED: probable disease resistance protein At5g66900 [Fragaria vesca subsp. vesca]; Probable disease resistance protein At5g66900 OS=Arabidopsis tha…	Activation of caspases through apoptosome-mediated cleavage; ADP binding; DISEASERSIST; FAMILY NOT NAMED; Formation of apoptosome; NB-ARC; Neutrophil degranulation; P-loop containing nucleoside triphosphate hydrolases; P-loop_NTPase; SUBFAMILY NOT NAMED; TP53 Regulates Transcription of Caspase Activators and Caspases; Transcriptional Regulation by E2F6; WH-like_DNA-bd_sf	ADP binding	GO:0043531
RC3G0136700	mRNA:RC3G0136700	Rosa chinensis	mRNA	Rosa chinensis Whole Genome v1.0 Assembly & Annotation	Chr03	21810536	21811530	Chr03:21810536..21811530	AT5G66900.1 | Symbols: | Disease resistance protein (CC-NBS-LRR class) family | chr5:26714931-26717757 REVERSE LENGTH=809; PREDICTED: probable disease resistance protein At5g66900 [Fragaria vesca subsp. vesca] &gt;gi|764514586|ref|XP_011464459.1| PREDICTED: probable disease resistance protein At5g66900 [Fragaria vesca subsp. vesca]; Probable disease resistance protein At5g66900 OS=Arabidopsis tha…	FAMILY NOT NAMED; Leu-rich_rpt; LRR_1; LRR_dom_sf; protein binding; RNI-like; SUBFAMILY NOT NAMED	protein binding	GO:0005515
RC3G0146400	mRNA:RC3G0146400	Rosa chinensis	mRNA	Rosa chinensis Whole Genome v1.0 Assembly & Annotation	Chr03	22728357	22734824	Chr03:22728357..22734824	AT5G45510.2 | Symbols: | Leucine-rich repeat (LRR) family protein | chr5:18444798-18448952 FORWARD LENGTH=1210; PREDICTED: putative disease resistance protein At4g19050 [Fragaria vesca subsp. vesca]; Probable disease resistance protein At5g45510 OS=Arabidopsis thaliana GN=At5g45510 PE=1 SV=2; tr|K4EY30|K4EY30_9ROSA Putative NBS-LRR disease resistance protein (Fragment) OS=Rubus sp. LAK-2011 PE=4 …	Activation of caspases through apoptosome-mediated cleavage; ADP binding; FAMILY NOT NAMED; Formation of apoptosome; NB-ARC; Neutrophil degranulation; P-loop containing nucleoside triphosphate hydrolases; P-loop_NTPase; SUBFAMILY NOT NAMED; TP53 Regulates Transcription of Caspase Activators and Caspases; Transcriptional Regulation by E2F6	ADP binding	GO:0043531
RC3G0132200	mRNA:RC3G0132200	Rosa chinensis	mRNA	Rosa chinensis Whole Genome v1.0 Assembly & Annotation	Chr03	21114966	21116851	Chr03:21114966..21116851	AT1G11310.1 | Symbols: MLO2, ATMLO2, PMR2 | Seven transmembrane MLO family protein | chr1:3800899-3803870 REVERSE LENGTH=573; PREDICTED: MLO-like protein 12 [Fragaria vesca subsp. vesca]; tr|A0A0B2NWS5|A0A0B2NWS5_GLYSO MLO-like protein OS=Glycine soja GN=MLO PE=3 SV=1	defense response; disorder_prediction; FAMILY NOT NAMED; integral component of membrane; Mlo; MLO-LIKE PROTEIN 12-RELATED	defense response; integral to membrane	GO:0006952; GO:0016021
RC3G0132400	mRNA:RC3G0132400	Rosa chinensis	mRNA	Rosa chinensis Whole Genome v1.0 Assembly & Annotation	Chr03	21150054	21156558	Chr03:21150054..21156558	AT2G39200.1 | Symbols: MLO12, ATMLO12 | Seven transmembrane MLO family protein | chr2:16356255-16359797 REVERSE LENGTH=576; MLO-like protein 12 OS=Arabidopsis thaliana GN=MLO12 PE=2 SV=2; PREDICTED: MLO-like protein 12 [Fragaria vesca subsp. vesca]; tr|A0A059A1R5|A0A059A1R5_EUCGR MLO-like protein (Fragment) OS=Eucalyptus grandis GN=MLO PE=3 SV=1	defense response; disorder_prediction; FAMILY NOT NAMED; integral component of membrane; Mlo; MLO-LIKE PROTEIN 12-RELATED	defense response; integral to membrane	GO:0006952; GO:0016021
