# Supplementary material for: Meta-Analysis of Rose Rosette Disease-Resistant Quantitative Trait Loci and a Search for Candidate Genes
Source: Pathogens. 2023 Apr 8;12(4):575. doi: 10.3390/pathogens12040575 (PMC10146096; doi:10.3390/pathogens12040575)
Supplement: Supplementary file 1 [file pathogens-12-00575-s001.zip › TableS8.xlsx]

## Sheet: Sheet 1
Table S8. List of candidate genes discovered in the MetaRRD5.1 interval including name, location, BLAST, functional analysis (InterPro), GO term and GO accession number.
Name	Unique.Name	Organism	Type	Genome.Transcriptome	Chromosome.Scaffold	Start.position	Stop.position	Location	BLAST	InterPro	GO.Term	GO.Accession
RC5G0030200	mRNA:RC5G0030200	Rosa chinensis	mRNA	Rosa chinensis Whole Genome v1.0 Assembly & Annotation	Chr05	2012173	2016350	Chr05:2012173..2016350	AT3G14470.1 | Symbols: | NB-ARC domain-containing disease resistance protein | chr3:4857940-4861104 FORWARD LENGTH=1054; PREDICTED: putative disease resistance protein RGA1 [Fragaria vesca subsp. vesca] &gt;gi|764601164|ref|XP_011466539.1| PREDICTED: putative disease resistance protein RGA1 [Fragaria vesca subsp. vesca] &gt;gi|764601167|ref|XP_011466540.1| PREDICTED: putative disease resistance p…	Activation of caspases through apoptosome-mediated cleavage; ADP binding; DISEASERSIST; Formation of apoptosome; L domain-like; LRR_dom_sf; NB-ARC; Neutrophil degranulation; P-loop containing nucleoside triphosphate hydrolases; P-loop_NTPase; Rcpt_L-dom_sf; TP53 Regulates Transcription of Caspase Activators and Caspases; Transcriptional Regulation by E2F6; WH-like_DNA-bd_sf	ADP binding	GO:0043531
RC5G0031700	mRNA:RC5G0031700	Rosa chinensis	mRNA	Rosa chinensis Whole Genome v1.0 Assembly & Annotation	Chr05	2180099	2186355	Chr05:2180099..2186355	AT3G14470.1 | Symbols: | NB-ARC domain-containing disease resistance protein | chr3:4857940-4861104 FORWARD LENGTH=1054; PREDICTED: putative disease resistance protein RGA3 isoform X2 [Fragaria vesca subsp. vesca]; Putative disease resistance protein RGA4 OS=Solanum bulbocastanum GN=RGA4 PE=2 SV=1; tr|M5XGE8|M5XGE8_PRUPE Uncharacterized protein OS=Prunus persica GN=PRUPE_ppa016447mg PE=3 SV=1	Activation of caspases through apoptosome-mediated cleavage; ADP binding; Coil; DISEASERSIST; Formation of apoptosome; L domain-like; LEUCINE-RICH REPEAT-CONTAINING PROTEIN; LRR_dom_sf; NB-ARC; Neutrophil degranulation; P-loop containing nucleoside triphosphate hydrolases; P-loop_NTPase; RX-CC_like; SUBFAMILY NOT NAMED; TP53 Regulates Transcription of Caspase Activators and Caspases; Transcriptio…	ADP binding	GO:0043531
RC5G0032000	mRNA:RC5G0032000	Rosa chinensis	mRNA	Rosa chinensis Whole Genome v1.0 Assembly & Annotation	Chr05	2200115	2202139	Chr05:2200115..2202139	AT3G14470.1 | Symbols: | NB-ARC domain-containing disease resistance protein | chr3:4857940-4861104 FORWARD LENGTH=1054; PREDICTED: putative disease resistance protein RGA3 isoform X2 [Fragaria vesca subsp. vesca]; Putative disease resistance protein RGA3 OS=Solanum bulbocastanum GN=RGA3 PE=2 SV=2; tr|M5XGE8|M5XGE8_PRUPE Uncharacterized protein OS=Prunus persica GN=PRUPE_ppa016447mg PE=3 SV=1	Activation of caspases through apoptosome-mediated cleavage; ADP binding; DISEASERSIST; Formation of apoptosome; L domain-like; LEUCINE-RICH REPEAT-CONTAINING PROTEIN; Leu-rich_rpt; LRR; LRR_dom_sf; NB-ARC; Neutrophil degranulation; P-loop containing nucleoside triphosphate hydrolases; P-loop_NTPase; protein binding; SUBFAMILY NOT NAMED; TP53 Regulates Transcription of Caspase Activators and Casp…	ADP binding; protein binding	GO:0005515; GO:0043531
RC5G0056600	mRNA:RC5G0056600	Rosa chinensis	mRNA	Rosa chinensis Whole Genome v1.0 Assembly & Annotation	Chr05	3871291	3871943	Chr05:3871291..3871943	AT3G07040.1 | Symbols: RPM1, RPS3 | NB-ARC domain-containing disease resistance protein | chr3:2226244-2229024 REVERSE LENGTH=926; Disease resistance protein RPM1 OS=Arabidopsis thaliana GN=RPM1 PE=1 SV=1; PREDICTED: disease resistance protein RPM1-like [Malus domestica]; tr|B9SHQ7|B9SHQ7_RICCO Leucine-rich repeat-containing protein, putative OS=Ricinus communis GN=RCOM_0742650 PE=3 SV=1	Activation of caspases through apoptosome-mediated cleavage; ADP binding; DISEASE RESISTANCE PROTEIN RPM1; FAMILY NOT NAMED; Formation of apoptosome; NB-ARC; Neutrophil degranulation; P-loop containing nucleoside triphosphate hydrolases; P-loop_NTPase; TP53 Regulates Transcription of Caspase Activators and Caspases; Transcriptional Regulation by E2F6; WH-like_DNA-bd_sf	ADP binding	GO:0043531
RC5G0075300	mRNA:RC5G0075300	Rosa chinensis	mRNA	Rosa chinensis Whole Genome v1.0 Assembly & Annotation	Chr05	5291520	5292584	Chr05:5291520..5292584	AT3G14470.1 | Symbols: | NB-ARC domain-containing disease resistance protein | chr3:4857940-4861104 FORWARD LENGTH=1054; PREDICTED: putative disease resistance protein RGA4 isoform X1 [Fragaria vesca subsp. vesca] &gt;gi|764560254|ref|XP_004294542.2| PREDICTED: putative disease resistance protein RGA4 isoform X1 [Fragaria vesca subsp. vesca] &gt;gi|764560257|ref|XP_011461163.1| PREDICTED: putativ…	Activation of caspases through apoptosome-mediated cleavage; ADP binding; Coil; DISEASERSIST; Formation of apoptosome; LEUCINE-RICH REPEAT-CONTAINING PROTEIN; NB-ARC; Neutrophil degranulation; P-loop containing nucleoside triphosphate hydrolases; P-loop_NTPase; RX-CC_like; SUBFAMILY NOT NAMED; TP53 Regulates Transcription of Caspase Activators and Caspases; Transcriptional Regulation by E2F6	ADP binding	GO:0043531
RC5G0075400	mRNA:RC5G0075400	Rosa chinensis	mRNA	Rosa chinensis Whole Genome v1.0 Assembly & Annotation	Chr05	5292906	5294046	Chr05:5292906..5294046	AT3G14470.1 | Symbols: | NB-ARC domain-containing disease resistance protein | chr3:4857940-4861104 FORWARD LENGTH=1054; PREDICTED: putative disease resistance protein RGA4 isoform X1 [Fragaria vesca subsp. vesca] &gt;gi|764560254|ref|XP_004294542.2| PREDICTED: putative disease resistance protein RGA4 isoform X1 [Fragaria vesca subsp. vesca] &gt;gi|764560257|ref|XP_011461163.1| PREDICTED: putativ…	Activation of caspases through apoptosome-mediated cleavage; ADP binding; DISEASERSIST; Formation of apoptosome; L domain-like; LEUCINE-RICH REPEAT-CONTAINING PROTEIN; Leu-rich_rpt; LRR; LRR_8; LRR_dom_sf; NB-ARC; Neutrophil degranulation; P-loop containing nucleoside triphosphate hydrolases; P-loop_NTPase; protein binding; SUBFAMILY NOT NAMED; TP53 Regulates Transcription of Caspase Activators a…	ADP binding; protein binding	GO:0005515; GO:0043531
RC5G0026000	mRNA:RC5G0026000	Rosa chinensis	mRNA	Rosa chinensis Whole Genome v1.0 Assembly & Annotation	Chr05	1658683	1659787	Chr05:1658683..1659787	60S acidic ribosomal protein P2 OS=Parthenium argentatum PE=3 SV=1; AT2G27710.3 | Symbols: | 60S acidic ribosomal protein family | chr2:11816929-11817670 FORWARD LENGTH=115; PREDICTED: 60S acidic ribosomal protein P2-like [Fragaria vesca subsp. vesca]; tr|A0A0D2P4V1|A0A0D2P4V1_GOSRA Uncharacterized protein OS=Gossypium raimondii GN=B456_004G008900 PE=3 SV=1	60S ACIDIC RIBOSOMAL PROTEIN FAMILY MEMBER; 60S ACIDIC RIBOSOMAL PROTEIN P2-3-RELATED; disorder_prediction; Eukaryotic Translation Termination; Formation of a pool of free 40S subunits; GTP hydrolysis and joining of the 60S ribosomal subunit; intracellular; L13a-mediated translational silencing of Ceruloplasmin expression; Major pathway of rRNA processing in the nucleolus and cytosol; Nonsense Me…	intracellular; ribosome; structural constituent of ribosome; translational elongation	GO:0003735; GO:0005622; GO:0005840; GO:0006414
RC5G0026100	mRNA:RC5G0026100	Rosa chinensis	mRNA	Rosa chinensis Whole Genome v1.0 Assembly & Annotation	Chr05	1660125	1661359	Chr05:1660125..1661359	60S acidic ribosomal protein P2 OS=Parthenium argentatum PE=3 SV=1; AT2G27710.4 | Symbols: | 60S acidic ribosomal protein family | chr2:11816929-11817670 FORWARD LENGTH=98; hypothetical protein B456_004G008900 [Gossypium raimondii]; tr|A0A0D2P4V1|A0A0D2P4V1_GOSRA Uncharacterized protein OS=Gossypium raimondii GN=B456_004G008900 PE=3 SV=1	60S ACIDIC RIBOSOMAL PROTEIN FAMILY MEMBER; 60S ACIDIC RIBOSOMAL PROTEIN P2-1-RELATED; disorder_prediction; Eukaryotic Translation Termination; Formation of a pool of free 40S subunits; GTP hydrolysis and joining of the 60S ribosomal subunit; intracellular; L13a-mediated translational silencing of Ceruloplasmin expression; Major pathway of rRNA processing in the nucleolus and cytosol; Nonsense Me…	intracellular; ribosome; structural constituent of ribosome; translation; translational elongation	GO:0003735; GO:0005622; GO:0005840; GO:0006412; GO:0006414
RC5G0041700	mRNA:RC5G0041700	Rosa chinensis	mRNA	Rosa chinensis Whole Genome v1.0 Assembly & Annotation	Chr05	2924369	2925707	Chr05:2924369..2925707		Abortive elongation of HIV-1 transcript in the absence of Tat; Activation of anterior HOX genes in hindbrain development during early embryogenesis; B-WICH complex positively regulates rRNA expression; Cytosolic sensors of pathogen-associated DNA; DNA binding; DNA-directed 5'-3' RNA polymerase activity; Dual incision in TC-NER; FGFR2 alternative splicing; Formation of HIV-1 elongation complex con…	DNA binding; DNA-directed RNA polymerase activity; transcription, DNA-dependent	GO:0003677; GO:0003899; GO:0006351
RC5G0071700	mRNA:RC5G0071700	Rosa chinensis	mRNA	Rosa chinensis Whole Genome v1.0 Assembly & Annotation	Chr05	5041806	5043311	Chr05:5041806..5043311	AT4G12610.1 | Symbols: RAP74, ATRAP74 | transcription activators;DNA binding;RNA polymerase II transcription factors;catalytics;transcription initiation factors | chr4:7455565-7457465 FORWARD LENGTH=400; PREDICTED: transcription initiation factor IIF subunit alpha-like [Fragaria vesca subsp. vesca]; Transcription initiation factor IIF subunit alpha OS=Arabidopsis thaliana GN=RAP74 PE=1 SV=1; tr|B…	Abortive elongation of HIV-1 transcript in the absence of Tat; disorder_prediction; DNA binding; FGFR2 alternative splicing; Formation of HIV-1 elongation complex containing HIV-1 Tat; Formation of HIV elongation complex in the absence of HIV Tat; Formation of RNA Pol II elongation complex; Formation of the Early Elongation Complex; Formation of the HIV-1 Early Elongation Complex; HIV elongation …	DNA binding; nucleus; positive regulation of transcription elongation from RNA polymerase II promoter; transcription initiation from RNA polymerase II promoter	GO:0003677; GO:0005634; GO:0006367; GO:0032968
RC5G0042400	mRNA:RC5G0042400	Rosa chinensis	mRNA	Rosa chinensis Whole Genome v1.0 Assembly & Annotation	Chr05	2982613	2985301	Chr05:2982613..2985301	AT1G58400.1 | Symbols: | Disease resistance protein (CC-NBS-LRR class) family | chr1:21696165-21699118 REVERSE LENGTH=900; Disease resistance RPP8-like protein 3 OS=Arabidopsis thaliana GN=RPP8L3 PE=2 SV=1; PREDICTED: disease susceptibility protein LOV1-like [Fragaria vesca subsp. vesca]; tr|M5W728|M5W728_PRUPE Uncharacterized protein OS=Prunus persica GN=PRUPE_ppa017999mg PE=3 SV=1	Activation of caspases through apoptosome-mediated cleavage; ADP binding; Coil; DISEASERSIST; Formation of apoptosome; L domain-like; LRR_dom_sf; NB-ARC; Neutrophil degranulation; P-loop containing nucleoside triphosphate hydrolases; P-loop_NTPase; RX-CC_like; TP53 Regulates Transcription of Caspase Activators and Caspases; Transcriptional Regulation by E2F6; WH-like_DNA-bd_sf	ADP binding	GO:0043531
RC5G0059300	mRNA:RC5G0059300	Rosa chinensis	mRNA	Rosa chinensis Whole Genome v1.0 Assembly & Annotation	Chr05	4052738	4053379	Chr05:4052738..4053379	AT1G12220.2 | Symbols: RPS5 | Disease resistance protein (CC-NBS-LRR class) family | chr1:4145011-4147680 FORWARD LENGTH=889; Disease resistance protein RPS5 OS=Arabidopsis thaliana GN=RPS5 PE=1 SV=2; hypothetical protein PRUPE_4G109000 [Prunus persica]; tr|M5X4J9|M5X4J9_PRUPE Uncharacterized protein (Fragment) OS=Prunus persica GN=PRUPE_ppa020065mg PE=4 SV=1	Activation of caspases through apoptosome-mediated cleavage; ADP binding; FAMILY NOT NAMED; Formation of apoptosome; NB-ARC; Neutrophil degranulation; P-loop containing nucleoside triphosphate hydrolases; P-loop_NTPase; TP53 Regulates Transcription of Caspase Activators and Caspases; Transcriptional Regulation by E2F6	ADP binding	GO:0043531
RC5G0061300	mRNA:RC5G0061300	Rosa chinensis	mRNA	Rosa chinensis Whole Genome v1.0 Assembly & Annotation	Chr05	4199023	4201464	Chr05:4199023..4201464	AT5G63020.1 | Symbols: | Disease resistance protein (CC-NBS-LRR class) family | chr5:25283252-25286002 REVERSE LENGTH=888; probable disease resistance protein At4g27220 isoform X1 [Prunus persica] &gt;gi|1162550438|ref|XP_020417077.1| probable disease resistance protein At4g27220 isoform X1 [Prunus persica] &gt;gi|1162550440|ref|XP_020417078.1| probable disease resistance protein At4g27220 isofor…	Activation of caspases through apoptosome-mediated cleavage; ADP binding; DISEASERSIST; FAMILY NOT NAMED; Formation of apoptosome; L domain-like; Leu-rich_rpt; LRR; LRR_8; LRR_dom_sf; NB-ARC; Neutrophil degranulation; P-loop containing nucleoside triphosphate hydrolases; P-loop_NTPase; protein binding; TP53 Regulates Transcription of Caspase Activators and Caspases; Transcriptional Regulation by …	ADP binding; protein binding	GO:0005515; GO:0043531
RC5G0061600	mRNA:RC5G0061600	Rosa chinensis	mRNA	Rosa chinensis Whole Genome v1.0 Assembly & Annotation	Chr05	4224795	4228453	Chr05:4224795..4228453	AT1G15890.1 | Symbols: | Disease resistance protein (CC-NBS-LRR class) family | chr1:5461406-5463961 FORWARD LENGTH=851; PREDICTED: probable disease resistance protein At4g27220 [Prunus mume]; Probable disease resistance protein At1g15890 OS=Arabidopsis thaliana GN=At1g15890 PE=3 SV=2; tr|M5X4J9|M5X4J9_PRUPE Uncharacterized protein (Fragment) OS=Prunus persica GN=PRUPE_ppa020065mg PE=4 SV=1	Activation of caspases through apoptosome-mediated cleavage; ADP binding; Coil; DISEASERSIST; FAMILY NOT NAMED; Formation of apoptosome; NB-ARC; Neutrophil degranulation; P-loop containing nucleoside triphosphate hydrolases; P-loop_NTPase; TP53 Regulates Transcription of Caspase Activators and Caspases; Transcriptional Regulation by E2F6; WH-like_DNA-bd_sf	ADP binding	GO:0043531
