# Supplementary material for: Meta-Analysis of Rose Rosette Disease-Resistant Quantitative Trait Loci and a Search for Candidate Genes
Source: Pathogens. 2023 Apr 8;12(4):575. doi: 10.3390/pathogens12040575 (PMC10146096; doi:10.3390/pathogens12040575)
Supplement: Supplementary file 1 [file pathogens-12-00575-s001.zip › TableS9.xlsx]

## Sheet: Sheet 1
Table S9. List of candidate genes discovered in the MetaRRD1.1 interval including name, location, BLAST, functional analysis (InterPro), GO term and GO accession number.qtl4_genes
Name	Unique.Name	Organism	Type	Genome.Transcriptome	Chromosome.Scaffold	Start.position	Stop.position	Location	BLAST	InterPro	GO.Term	GO.Accession
RC5G0143800	mRNA:RC5G0143800	Rosa chinensis	mRNA	Rosa chinensis Whole Genome v1.0 Assembly & Annotation	Chr05	10804352	10804690	Chr05:10804352..10804690	AT3G07040.1 | Symbols: RPM1, RPS3 | NB-ARC domain-containing disease resistance protein | chr3:2226244-2229024 REVERSE LENGTH=926; Disease resistance protein RPM1 OS=Arabidopsis thaliana GN=RPM1 PE=1 SV=1; PREDICTED: disease resistance protein RPM1-like [Fragaria vesca subsp. vesca]; tr|Q6PKX5|Q6PKX5_PRUPE Putative NBS-LRR type disease resistance protein OS=Prunus persica GN=RPM1 PE=2 SV=1	Activation of caspases through apoptosome-mediated cleavage; ADP binding; DISEASE RESISTANCE PROTEIN RPM1; DISEASERSIST; FAMILY NOT NAMED; Fer4_NifH; Formation of apoptosome; NB-ARC; Neutrophil degranulation; P-loop containing nucleoside triphosphate hydrolases; P-loop_NTPase; TP53 Regulates Transcription of Caspase Activators and Caspases; Transcriptional Regulation by E2F6	ADP binding	GO:0043531
RC5G0149800	mRNA:RC5G0149800	Rosa chinensis	mRNA	Rosa chinensis Whole Genome v1.0 Assembly & Annotation	Chr05	11250263	11252152	Chr05:11250263..11252152	AT4G27190.1 | Symbols: | NB-ARC domain-containing disease resistance protein | chr4:13620977-13623934 REVERSE LENGTH=985; Disease resistance protein At4g27190 OS=Arabidopsis thaliana GN=At4g27190 PE=2 SV=1; PREDICTED: disease resistance protein At4g27190-like [Pyrus x bretschneideri]; tr|M5WQV9|M5WQV9_PRUPE Uncharacterized protein OS=Prunus persica GN=PRUPE_ppa017584mg PE=4 SV=1	Activation of caspases through apoptosome-mediated cleavage; ADP binding; DISEASERSIST; FAMILY NOT NAMED; Formation of apoptosome; L domain-like; LRR_dom_sf; NB-ARC; Neutrophil degranulation; P-loop containing nucleoside triphosphate hydrolases; P-loop_NTPase; TP53 Regulates Transcription of Caspase Activators and Caspases; Transcriptional Regulation by E2F6; WH-like_DNA-bd_sf	ADP binding	GO:0043531
RC5G0151300	mRNA:RC5G0151300	Rosa chinensis	mRNA	Rosa chinensis Whole Genome v1.0 Assembly & Annotation	Chr05	11347774	11350900	Chr05:11347774..11350900	AT4G27190.1 | Symbols: | NB-ARC domain-containing disease resistance protein | chr4:13620977-13623934 REVERSE LENGTH=985; Disease resistance protein At4g27190 OS=Arabidopsis thaliana GN=At4g27190 PE=2 SV=1; putative NBS-LRR disease resistance protein, partial [Rubus sp. LAK-2011]; tr|K4EY39|K4EY39_9ROSA Putative NBS-LRR disease resistance protein (Fragment) OS=Rubus sp. LAK-2011 PE=4 SV=1	Activation of caspases through apoptosome-mediated cleavage; ADP binding; FAMILY NOT NAMED; Formation of apoptosome; NB-ARC; Neutrophil degranulation; P-loop containing nucleoside triphosphate hydrolases; P-loop_NTPase; TP53 Regulates Transcription of Caspase Activators and Caspases; Transcriptional Regulation by E2F6	ADP binding	GO:0043531
RC5G0167000	mRNA:RC5G0167000	Rosa chinensis	mRNA	Rosa chinensis Whole Genome v1.0 Assembly & Annotation	Chr05	12750787	12755732	Chr05:12750787..12755732	AT3G07040.1 | Symbols: RPM1, RPS3 | NB-ARC domain-containing disease resistance protein | chr3:2226244-2229024 REVERSE LENGTH=926; Disease resistance protein RPM1 OS=Arabidopsis thaliana GN=RPM1 PE=1 SV=1; PREDICTED: disease resistance protein RPM1-like [Fragaria vesca subsp. vesca]; tr|M5VN91|M5VN91_PRUPE Uncharacterized protein OS=Prunus persica GN=PRUPE_ppa014877mg PE=3 SV=1	Activation of caspases through apoptosome-mediated cleavage; ADP binding; DISEASE RESISTANCE PROTEIN RPM1; DISEASERSIST; FAMILY NOT NAMED; Formation of apoptosome; L domain-like; Leu-rich_rpt; LRR_8; LRR_dom_sf; NB-ARC; Neutrophil degranulation; P-loop containing nucleoside triphosphate hydrolases; P-loop_NTPase; protein binding; RX-CC_like; TP53 Regulates Transcription of Caspase Activators and …	ADP binding; protein binding	GO:0005515; GO:0043531
RC5G0127100	mRNA:RC5G0127100	Rosa chinensis	mRNA	Rosa chinensis Whole Genome v1.0 Assembly & Annotation	Chr05	9427444	9432519	Chr05:9427444..9432519	60S ribosomal protein L18a isoform X2 [Prunus persica]; 60S ribosomal protein L18a OS=Castanea sativa GN=RPL18A PE=2 SV=1; AT1G29970.2 | Symbols: RPL18AA | 60S ribosomal protein L18A-1 | chr1:10498458-10501311 REVERSE LENGTH=312; tr|B9S129|B9S129_RICCO 60S ribosomal protein L18a, putative OS=Ricinus communis GN=RCOM_0632990 PE=3 SV=1	50S_L18Ae/Ribosomal_L18a/L20; 60S RIBOSOMAL PROTEIN L18A; disorder_prediction; Eukaryotic Translation Termination; Formation of a pool of free 40S subunits; GTP hydrolysis and joining of the 60S ribosomal subunit; L13a-mediated translational silencing of Ceruloplasmin expression; Major pathway of rRNA processing in the nucleolus and cytosol; Nonsense Mediated Decay (NMD) enhanced by the Exon Junc…	ribosome; structural constituent of ribosome; translation	GO:0003735; GO:0005840; GO:0006412
RC5G0139400	mRNA:RC5G0139400	Rosa chinensis	mRNA	Rosa chinensis Whole Genome v1.0 Assembly & Annotation	Chr05	10465199	10468770	Chr05:10465199..10468770	AT1G73240.1 | Symbols: | CONTAINS InterPro DOMAIN/s: Nucleoporin protein Ndc1-Nup (InterPro:IPR019049); Has 36 Blast hits to 36 proteins in 17 species: Archae - 0; Bacteria - 0; Metazoa - 1; Fungi - 0; Plants - 35; Viruses - 0; Other Eukaryotes - 0 (source: NCBI BLink). | chr1:27542397-27544668 REVERSE LENGTH=519; PREDICTED: uncharacterized protein LOC105350268 [Fragaria vesca subsp. vesca]; tr|M…	Coil; ISG15 antiviral mechanism; Ndc1_Nup; NEP/NS2 Interacts with the Cellular Export Machinery; NS1 Mediated Effects on Host Pathways; Nuclear import of Rev protein; Nuclear Pore Complex (NPC) Disassembly; Nucleoporin_prot_Ndc1/Nup; Regulation of Glucokinase by Glucokinase Regulatory Protein; Regulation of HSF1-mediated heat shock response; Rev-mediated nuclear export of HIV RNA; snRNP Assembly;…
RC5G0158500	mRNA:RC5G0158500	Rosa chinensis	mRNA	Rosa chinensis Whole Genome v1.0 Assembly & Annotation	Chr05	12031882	12032124	Chr05:12031882..12032124	40S ribosomal protein S17-4 OS=Arabidopsis thaliana GN=RPS17D PE=2 SV=3; AT5G04800.4 | Symbols: | Ribosomal S17 family protein | chr5:1389217-1389642 FORWARD LENGTH=141; PREDICTED: 40S ribosomal protein S17-like [Fragaria vesca subsp. vesca]; tr|M5W9L6|M5W9L6_PRUPE Uncharacterized protein OS=Prunus persica GN=PRUPE_ppa013094mg PE=3 SV=1	40S RIBOSOMAL PROTEIN S17; disorder_prediction; Eukaryotic Translation Termination; Formation of a pool of free 40S subunits; Formation of the ternary complex, and subsequently, the 43S complex; GTP hydrolysis and joining of the 60S ribosomal subunit; intracellular; L13a-mediated translational silencing of Ceruloplasmin expression; Major pathway of rRNA processing in the nucleolus and cytosol; No…	intracellular; ribosome; structural constituent of ribosome; translation	GO:0003735; GO:0005622; GO:0005840; GO:0006412
RC5G0164600	mRNA:RC5G0164600	Rosa chinensis	mRNA	Rosa chinensis Whole Genome v1.0 Assembly & Annotation	Chr05	12522033	12524819	Chr05:12522033..12524819	60S ribosomal protein L35a-3 OS=Arabidopsis thaliana GN=RPL35AC PE=3 SV=1; AT1G74270.1 | Symbols: | Ribosomal protein L35Ae family protein | chr1:27928415-27929466 REVERSE LENGTH=112; PREDICTED: uncharacterized protein LOC105350346 isoform X2 [Fragaria vesca subsp. vesca]; tr|W1PQY2|W1PQY2_AMBTC Uncharacterized protein OS=Amborella trichopoda GN=AMTR_s00029p00195890 PE=4 SV=1	60S RIBOSOMAL PROTEIN L35A; Eukaryotic Translation Termination; Formation of a pool of free 40S subunits; GTP hydrolysis and joining of the 60S ribosomal subunit; intracellular; L13a-mediated translational silencing of Ceruloplasmin expression; Major pathway of rRNA processing in the nucleolus and cytosol; Nonsense Mediated Decay (NMD) enhanced by the Exon Junction Complex (EJC); Nonsense Mediate…	intracellular; ribosome; structural constituent of ribosome; translation	GO:0003735; GO:0005622; GO:0005840; GO:0006412
RC5G0166800	mRNA:RC5G0166800	Rosa chinensis	mRNA	Rosa chinensis Whole Genome v1.0 Assembly & Annotation	Chr05	12716638	12717046	Chr05:12716638..12717046	60S ribosomal protein L35a-3 OS=Arabidopsis thaliana GN=RPL35AC PE=3 SV=1; AT1G74270.1 | Symbols: | Ribosomal protein L35Ae family protein | chr1:27928415-27929466 REVERSE LENGTH=112; PREDICTED: 60S ribosomal protein L35a-3 [Eucalyptus grandis] &gt;gi|629084166|gb|KCW50523.1| hypothetical protein EUGRSUZ_J00247 [Eucalyptus grandis]; tr|A0A059A9L7|A0A059A9L7_EUCGR Uncharacterized protein OS=Eucaly…	60S RIBOSOMAL PROTEIN L35A; 60S RIBOSOMAL PROTEIN L35A-1-RELATED; Eukaryotic Translation Termination; Formation of a pool of free 40S subunits; GTP hydrolysis and joining of the 60S ribosomal subunit; intracellular; L13a-mediated translational silencing of Ceruloplasmin expression; Major pathway of rRNA processing in the nucleolus and cytosol; Nonsense Mediated Decay (NMD) enhanced by the Exon Ju…	intracellular; ribosome; structural constituent of ribosome; translation	GO:0003735; GO:0005622; GO:0005840; GO:0006412
RC5G0168500	mRNA:RC5G0168500	Rosa chinensis	mRNA	Rosa chinensis Whole Genome v1.0 Assembly & Annotation	Chr05	12998181	12999979	Chr05:12998181..12999979	60S ribosomal protein L8-3 OS=Arabidopsis thaliana GN=RPL8C PE=2 SV=2; AT4G36130.1 | Symbols: | Ribosomal protein L2 family | chr4:17097613-17098656 FORWARD LENGTH=258; PREDICTED: 60S ribosomal protein L8-3 [Fragaria vesca subsp. vesca] &gt;gi|470120872|ref|XP_004296511.1| PREDICTED: 60S ribosomal protein L8-3 [Fragaria vesca subsp. vesca]; tr|M5WP60|M5WP60_PRUPE Uncharacterized protein OS=Prunus…	60S RIBOSOMAL PROTEIN L8-2-RELATED; disorder_prediction; Eukaryotic Translation Termination; Formation of a pool of free 40S subunits; GTP hydrolysis and joining of the 60S ribosomal subunit; intracellular; L13a-mediated translational silencing of Ceruloplasmin expression; large ribosomal subunit; Major pathway of rRNA processing in the nucleolus and cytosol; NA-bd_OB-fold; Nonsense Mediated Deca…	intracellular; large ribosomal subunit; ribosome; RNA binding; structural constituent of ribosome; translation	GO:0003723; GO:0003735; GO:0005622; GO:0005840; GO:0006412; GO:0015934
RC5G0139400	mRNA:RC5G0139400	Rosa chinensis	mRNA	Rosa chinensis Whole Genome v1.0 Assembly & Annotation	Chr05	10465199	10468770	Chr05:10465199..10468770	AT1G73240.1 | Symbols: | CONTAINS InterPro DOMAIN/s: Nucleoporin protein Ndc1-Nup (InterPro:IPR019049); Has 36 Blast hits to 36 proteins in 17 species: Archae - 0; Bacteria - 0; Metazoa - 1; Fungi - 0; Plants - 35; Viruses - 0; Other Eukaryotes - 0 (source: NCBI BLink). | chr1:27542397-27544668 REVERSE LENGTH=519; PREDICTED: uncharacterized protein LOC105350268 [Fragaria vesca subsp. vesca]; tr|M…	Coil; ISG15 antiviral mechanism; Ndc1_Nup; NEP/NS2 Interacts with the Cellular Export Machinery; NS1 Mediated Effects on Host Pathways; Nuclear import of Rev protein; Nuclear Pore Complex (NPC) Disassembly; Nucleoporin_prot_Ndc1/Nup; Regulation of Glucokinase by Glucokinase Regulatory Protein; Regulation of HSF1-mediated heat shock response; Rev-mediated nuclear export of HIV RNA; snRNP Assembly;…
RC5G0127700	mRNA:RC5G0127700	Rosa chinensis	mRNA	Rosa chinensis Whole Genome v1.0 Assembly & Annotation	Chr05	9487723	9492155	Chr05:9487723..9492155	AT5G17680.1 | Symbols: | disease resistance protein (TIR-NBS-LRR class), putative | chr5:5822999-5827153 FORWARD LENGTH=1294; PREDICTED: TMV resistance protein N-like [Fragaria vesca subsp. vesca] &gt;gi|764586370|ref|XP_011464641.1| PREDICTED: TMV resistance protein N-like [Fragaria vesca subsp. vesca]; TMV resistance protein N OS=Nicotiana glutinosa GN=N PE=1 SV=1; tr|M5X609|M5X609_PRUPE Unchar…	Activation of caspases through apoptosome-mediated cleavage; ADP binding; DISEASERSIST; Formation of apoptosome; L domain-like; LEUCINE-RICH REPEAT-CONTAINING PROTEIN; LRR_dom_sf; NB-ARC; Neutrophil degranulation; P-loop containing nucleoside triphosphate hydrolases; P-loop_NTPase; protein binding; RNI-like; signal transduction; SUBFAMILY NOT NAMED; TIR; TIR_dom; Toll/Interleukin receptor TIR dom…	ADP binding; protein binding; signal transduction	GO:0005515; GO:0007165; GO:0043531
RC5G0127800	mRNA:RC5G0127800	Rosa chinensis	mRNA	Rosa chinensis Whole Genome v1.0 Assembly & Annotation	Chr05	9497607	9498370	Chr05:9497607..9498370	AT1G65850.1 | Symbols: | Disease resistance protein (TIR-NBS-LRR class) family | chr1:24494734-24498485 FORWARD LENGTH=1036; PREDICTED: TMV resistance protein N-like [Fragaria vesca subsp. vesca]; TMV resistance protein N OS=Nicotiana glutinosa GN=N PE=1 SV=1; tr|M5WIP0|M5WIP0_PRUPE Uncharacterized protein OS=Prunus persica GN=PRUPE_ppa020926mg PE=4 SV=1	LEUCINE-RICH REPEAT-CONTAINING PROTEIN; protein binding; signal transduction; SUBFAMILY NOT NAMED; TIR; TIR_dom; Toll/Interleukin receptor TIR domain; Toll_tir_struct_dom_sf	protein binding; signal transduction	GO:0005515; GO:0007165
RC5G0127900	mRNA:RC5G0127900	Rosa chinensis	mRNA	Rosa chinensis Whole Genome v1.0 Assembly & Annotation	Chr05	9498681	9501864	Chr05:9498681..9501864	AT5G17680.1 | Symbols: | disease resistance protein (TIR-NBS-LRR class), putative | chr5:5822999-5827153 FORWARD LENGTH=1294; Disease resistance protein TAO1 OS=Arabidopsis thaliana GN=TAO1 PE=4 SV=1; PREDICTED: TMV resistance protein N-like [Fragaria vesca subsp. vesca]; tr|S4S9Y6|S4S9Y6_FRAVE NBS protein (Fragment) OS=Fragaria vesca GN=NBS26 PE=2 SV=1	Activation of caspases through apoptosome-mediated cleavage; ADP binding; Formation of apoptosome; L domain-like; Leu-rich_rpt; Leu-rich_rpt_3; LRR_3; LRR_8; LRR_dom_sf; NB-ARC; Neutrophil degranulation; P-loop containing nucleoside triphosphate hydrolases; P-loop_NTPase; protein binding; &quot;Winged helix&quot; DNA-binding domain; RNI-like; TP53 Regulates Transcription of Caspase Activators and…	ADP binding; protein binding	GO:0005515; GO:0043531
RC5G0128100	mRNA:RC5G0128100	Rosa chinensis	mRNA	Rosa chinensis Whole Genome v1.0 Assembly & Annotation	Chr05	9506935	9509502	Chr05:9506935..9509502	AT5G17680.1 | Symbols: | disease resistance protein (TIR-NBS-LRR class), putative | chr5:5822999-5827153 FORWARD LENGTH=1294; PREDICTED: TMV resistance protein N-like [Fragaria vesca subsp. vesca]; TMV resistance protein N OS=Nicotiana glutinosa GN=N PE=1 SV=1; tr|M5WIP0|M5WIP0_PRUPE Uncharacterized protein OS=Prunus persica GN=PRUPE_ppa020926mg PE=4 SV=1	Activation of caspases through apoptosome-mediated cleavage; ADP binding; DISEASERSIST; Formation of apoptosome; LEUCINE-RICH REPEAT-CONTAINING PROTEIN; LRR_dom_sf; NB-ARC; Neutrophil degranulation; P-loop containing nucleoside triphosphate hydrolases; P-loop_NTPase; protein binding; &quot;Winged helix&quot; DNA-binding domain; signal transduction; SUBFAMILY NOT NAMED; TIR; TIR_dom; Toll/Interleu…	ADP binding; protein binding; signal transduction	GO:0005515; GO:0007165; GO:0043531
RC5G0128500	mRNA:RC5G0128500	Rosa chinensis	mRNA	Rosa chinensis Whole Genome v1.0 Assembly & Annotation	Chr05	9525932	9527166	Chr05:9525932..9527166	AT2G14080.1 | Symbols: | Disease resistance protein (TIR-NBS-LRR class) family | chr2:5925225-5929600 FORWARD LENGTH=1215; PREDICTED: TMV resistance protein N-like [Fragaria vesca subsp. vesca]; Probable disease resistance protein RPP1 OS=Arabidopsis thaliana GN=RPP1 PE=2 SV=1; tr|S4S9Y6|S4S9Y6_FRAVE NBS protein (Fragment) OS=Fragaria vesca GN=NBS26 PE=2 SV=1	ATP BINDING PROTEIN-RELATED; FAMILY NOT NAMED; L domain-like; LRR_dom_sf
RC5G0143800	mRNA:RC5G0143800	Rosa chinensis	mRNA	Rosa chinensis Whole Genome v1.0 Assembly & Annotation	Chr05	10804352	10804690	Chr05:10804352..10804690	AT3G07040.1 | Symbols: RPM1, RPS3 | NB-ARC domain-containing disease resistance protein | chr3:2226244-2229024 REVERSE LENGTH=926; Disease resistance protein RPM1 OS=Arabidopsis thaliana GN=RPM1 PE=1 SV=1; PREDICTED: disease resistance protein RPM1-like [Fragaria vesca subsp. vesca]; tr|Q6PKX5|Q6PKX5_PRUPE Putative NBS-LRR type disease resistance protein OS=Prunus persica GN=RPM1 PE=2 SV=1	Activation of caspases through apoptosome-mediated cleavage; ADP binding; DISEASE RESISTANCE PROTEIN RPM1; DISEASERSIST; FAMILY NOT NAMED; Fer4_NifH; Formation of apoptosome; NB-ARC; Neutrophil degranulation; P-loop containing nucleoside triphosphate hydrolases; P-loop_NTPase; TP53 Regulates Transcription of Caspase Activators and Caspases; Transcriptional Regulation by E2F6	ADP binding	GO:0043531
RC5G0151300	mRNA:RC5G0151300	Rosa chinensis	mRNA	Rosa chinensis Whole Genome v1.0 Assembly & Annotation	Chr05	11347774	11350900	Chr05:11347774..11350900	AT4G27190.1 | Symbols: | NB-ARC domain-containing disease resistance protein | chr4:13620977-13623934 REVERSE LENGTH=985; Disease resistance protein At4g27190 OS=Arabidopsis thaliana GN=At4g27190 PE=2 SV=1; putative NBS-LRR disease resistance protein, partial [Rubus sp. LAK-2011]; tr|K4EY39|K4EY39_9ROSA Putative NBS-LRR disease resistance protein (Fragment) OS=Rubus sp. LAK-2011 PE=4 SV=1	Activation of caspases through apoptosome-mediated cleavage; ADP binding; FAMILY NOT NAMED; Formation of apoptosome; NB-ARC; Neutrophil degranulation; P-loop containing nucleoside triphosphate hydrolases; P-loop_NTPase; TP53 Regulates Transcription of Caspase Activators and Caspases; Transcriptional Regulation by E2F6	ADP binding	GO:0043531
