# Supplementary material for: Meta-Analysis of Rose Rosette Disease-Resistant Quantitative Trait Loci and a Search for Candidate Genes
Source: Pathogens. 2023 Apr 8;12(4):575. doi: 10.3390/pathogens12040575 (PMC10146096; doi:10.3390/pathogens12040575)
Supplement: Supplementary file 1 [file pathogens-12-00575-s001.zip › TableS10.xlsx]

## Sheet: Sheet 1
Table S10. List of candidate genes discovered in the MetaRRD5.2 interval including name, location, BLAST, functional analysis (InterPro), GO term and GO accession number.qtl5_genes
Name	Unique.Name	Organism	Type	Genome.Transcriptome	Chromosome.Scaffold	Start.position	Stop.position	Location	BLAST	InterPro	GO.Term	GO.Accession
RC5G0245000	mRNA:RC5G0245000	Rosa chinensis	mRNA	Rosa chinensis Whole Genome v1.0 Assembly & Annotation	Chr05	20532298	20535069	Chr05:20532298..20535069	AT3G07040.1 | Symbols: RPM1, RPS3 | NB-ARC domain-containing disease resistance protein | chr3:2226244-2229024 REVERSE LENGTH=926; Disease resistance protein RPM1 OS=Arabidopsis thaliana GN=RPM1 PE=1 SV=1; PREDICTED: disease resistance protein RPM1-like [Malus domestica]; tr|M5WPA2|M5WPA2_PRUPE Uncharacterized protein OS=Prunus persica GN=PRUPE_ppa026627mg PE=3 SV=1	Activation of caspases through apoptosome-mediated cleavage; ADP binding; DISEASERSIST; FAMILY NOT NAMED; Formation of apoptosome; L domain-like; LRR_dom_sf; NB-ARC; Neutrophil degranulation; P-loop containing nucleoside triphosphate hydrolases; P-loop_NTPase; TP53 Regulates Transcription of Caspase Activators and Caspases; Transcriptional Regulation by E2F6; WH-like_DNA-bd_sf	ADP binding	GO:0043531
RC5G0246000	mRNA:RC5G0246000	Rosa chinensis	mRNA	Rosa chinensis Whole Genome v1.0 Assembly & Annotation	Chr05	20626060	20628735	Chr05:20626060..20628735	AT3G07040.1 | Symbols: RPM1, RPS3 | NB-ARC domain-containing disease resistance protein | chr3:2226244-2229024 REVERSE LENGTH=926; Disease resistance protein RPM1 OS=Arabidopsis thaliana GN=RPM1 PE=1 SV=1; PREDICTED: disease resistance protein RPM1-like [Malus domestica]; tr|M5WPA2|M5WPA2_PRUPE Uncharacterized protein OS=Prunus persica GN=PRUPE_ppa026627mg PE=3 SV=1	Activation of caspases through apoptosome-mediated cleavage; ADP binding; Coil; DISEASERSIST; FAMILY NOT NAMED; Formation of apoptosome; L domain-like; LRR_dom_sf; NB-ARC; Neutrophil degranulation; P-loop containing nucleoside triphosphate hydrolases; P-loop_NTPase; RX-CC_like; SUBFAMILY NOT NAMED; TP53 Regulates Transcription of Caspase Activators and Caspases; Transcriptional Regulation by E2F6…	ADP binding	GO:0043531
RC5G0246200	mRNA:RC5G0246200	Rosa chinensis	mRNA	Rosa chinensis Whole Genome v1.0 Assembly & Annotation	Chr05	20665971	20666845	Chr05:20665971..20666845	AT3G07040.1 | Symbols: RPM1, RPS3 | NB-ARC domain-containing disease resistance protein | chr3:2226244-2229024 REVERSE LENGTH=926; Disease resistance protein RPM1 OS=Arabidopsis thaliana GN=RPM1 PE=1 SV=1; PREDICTED: putative disease resistance RPP13-like protein 3 [Fragaria vesca subsp. vesca]; tr|A0A061F4T0|A0A061F4T0_THECC NB-ARC domain-containing disease resistance-like protein OS=Theobroma c…	FAMILY NOT NAMED; LRR_dom_sf; SUBFAMILY NOT NAMED
RC5G0327400	mRNA:RC5G0327400	Rosa chinensis	mRNA	Rosa chinensis Whole Genome v1.0 Assembly & Annotation	Chr05	30163102	30167202	Chr05:30163102..30167202	AT4G27190.1 | Symbols: | NB-ARC domain-containing disease resistance protein | chr4:13620977-13623934 REVERSE LENGTH=985; Disease resistance protein At4g27190 OS=Arabidopsis thaliana GN=At4g27190 PE=2 SV=1; PREDICTED: disease resistance protein At4g27190-like [Fragaria vesca subsp. vesca]; tr|M5X8U5|M5X8U5_PRUPE Uncharacterized protein OS=Prunus persica GN=PRUPE_ppa026334mg PE=3 SV=1	Activation of caspases through apoptosome-mediated cleavage; ADP binding; Coil; DISEASERSIST; FAMILY NOT NAMED; Formation of apoptosome; L domain-like; Leu-rich_rpt; LRR_8; LRR_dom_sf; NB-ARC; Neutrophil degranulation; P-loop containing nucleoside triphosphate hydrolases; P-loop_NTPase; protein binding; SUBFAMILY NOT NAMED; TP53 Regulates Transcription of Caspase Activators and Caspases; Transcri…	ADP binding; protein binding	GO:0005515; GO:0043531
RC5G0343100	mRNA:RC5G0343100	Rosa chinensis	mRNA	Rosa chinensis Whole Genome v1.0 Assembly & Annotation	Chr05	32481329	32483874	Chr05:32481329..32483874	AT3G14470.1 | Symbols: | NB-ARC domain-containing disease resistance protein | chr3:4857940-4861104 FORWARD LENGTH=1054; PREDICTED: putative disease resistance protein At3g14460 [Fragaria vesca subsp. vesca]; Putative disease resistance RPP13-like protein 1 OS=Arabidopsis thaliana GN=RPPL1 PE=3 SV=1; tr|M5W2F8|M5W2F8_PRUPE Uncharacterized protein OS=Prunus persica GN=PRUPE_ppa024822mg PE=3 SV=1	Activation of caspases through apoptosome-mediated cleavage; ADP binding; DISEASERSIST; Formation of apoptosome; L domain-like; LEUCINE-RICH REPEAT-CONTAINING PROTEIN; LRR_dom_sf; NB-ARC; Neutrophil degranulation; P-loop containing nucleoside triphosphate hydrolases; P-loop_NTPase; TP53 Regulates Transcription of Caspase Activators and Caspases; Transcriptional Regulation by E2F6; WH-like_DNA-bd_…	ADP binding	GO:0043531
RC5G0343400	mRNA:RC5G0343400	Rosa chinensis	mRNA	Rosa chinensis Whole Genome v1.0 Assembly & Annotation	Chr05	32499168	32502401	Chr05:32499168..32502401	AT3G14470.1 | Symbols: | NB-ARC domain-containing disease resistance protein | chr3:4857940-4861104 FORWARD LENGTH=1054; PREDICTED: putative disease resistance protein At3g14460 [Fragaria vesca subsp. vesca]; Putative disease resistance RPP13-like protein 1 OS=Arabidopsis thaliana GN=RPPL1 PE=3 SV=1; tr|M5WIY5|M5WIY5_PRUPE Uncharacterized protein OS=Prunus persica GN=PRUPE_ppa015043mg PE=3 SV=1	Activation of caspases through apoptosome-mediated cleavage; ADP binding; Coil; DISEASERSIST; Formation of apoptosome; L domain-like; LEUCINE-RICH REPEAT-CONTAINING PROTEIN; LRR_dom_sf; NB-ARC; Neutrophil degranulation; P-loop containing nucleoside triphosphate hydrolases; P-loop_NTPase; SUBFAMILY NOT NAMED; TP53 Regulates Transcription of Caspase Activators and Caspases; Transcriptional Regulati…	ADP binding	GO:0043531
RC5G0343500	mRNA:RC5G0343500	Rosa chinensis	mRNA	Rosa chinensis Whole Genome v1.0 Assembly & Annotation	Chr05	32505090	32506001	Chr05:32505090..32506001	AT3G14470.1 | Symbols: | NB-ARC domain-containing disease resistance protein | chr3:4857940-4861104 FORWARD LENGTH=1054; PREDICTED: putative disease resistance protein At3g14460 [Fragaria vesca subsp. vesca]; Putative disease resistance RPP13-like protein 1 OS=Arabidopsis thaliana GN=RPPL1 PE=3 SV=1; tr|M5WIY5|M5WIY5_PRUPE Uncharacterized protein OS=Prunus persica GN=PRUPE_ppa015043mg PE=3 SV=1	Activation of caspases through apoptosome-mediated cleavage; ADP binding; DISEASE RESISTANCE RPP13-LIKE PROTEIN 1-RELATED; DISEASERSIST; Formation of apoptosome; LEUCINE-RICH REPEAT-CONTAINING PROTEIN; NB-ARC; Neutrophil degranulation; P-loop containing nucleoside triphosphate hydrolases; P-loop_NTPase; TP53 Regulates Transcription of Caspase Activators and Caspases; Transcriptional Regulation by…	ADP binding	GO:0043531
RC5G0343600	mRNA:RC5G0343600	Rosa chinensis	mRNA	Rosa chinensis Whole Genome v1.0 Assembly & Annotation	Chr05	32506807	32507211	Chr05:32506807..32507211	AT3G14470.1 | Symbols: | NB-ARC domain-containing disease resistance protein | chr3:4857940-4861104 FORWARD LENGTH=1054; PREDICTED: putative disease resistance protein At3g14460 [Fragaria vesca subsp. vesca]; Putative disease resistance RPP13-like protein 1 OS=Arabidopsis thaliana GN=RPPL1 PE=3 SV=1; tr|M5WIY5|M5WIY5_PRUPE Uncharacterized protein OS=Prunus persica GN=PRUPE_ppa015043mg PE=3 SV=1	Coil; LEUCINE-RICH REPEAT-CONTAINING PROTEIN; SUBFAMILY NOT NAMED
RC5G0343700	mRNA:RC5G0343700	Rosa chinensis	mRNA	Rosa chinensis Whole Genome v1.0 Assembly & Annotation	Chr05	32507785	32512256	Chr05:32507785..32512256	AT3G14470.1 | Symbols: | NB-ARC domain-containing disease resistance protein | chr3:4857940-4861104 FORWARD LENGTH=1054; PREDICTED: putative disease resistance protein At3g14460 [Fragaria vesca subsp. vesca]; Putative disease resistance RPP13-like protein 1 OS=Arabidopsis thaliana GN=RPPL1 PE=3 SV=1; tr|M5W2F8|M5W2F8_PRUPE Uncharacterized protein OS=Prunus persica GN=PRUPE_ppa024822mg PE=3 SV=1	Activation of caspases through apoptosome-mediated cleavage; ADP binding; Coil; DISEASERSIST; Formation of apoptosome; L domain-like; LEUCINE-RICH REPEAT-CONTAINING PROTEIN; LRR_dom_sf; NB-ARC; Neutrophil degranulation; P-loop containing nucleoside triphosphate hydrolases; P-loop_NTPase; SUBFAMILY NOT NAMED; TP53 Regulates Transcription of Caspase Activators and Caspases; Transcriptional Regulati…	ADP binding	GO:0043531
RC5G0346300	mRNA:RC5G0346300	Rosa chinensis	mRNA	Rosa chinensis Whole Genome v1.0 Assembly & Annotation	Chr05	32787576	32790430	Chr05:32787576..32790430	AT3G14470.1 | Symbols: | NB-ARC domain-containing disease resistance protein | chr3:4857940-4861104 FORWARD LENGTH=1054; PREDICTED: putative disease resistance protein At3g14460 [Fragaria vesca subsp. vesca]; Putative disease resistance RPP13-like protein 1 OS=Arabidopsis thaliana GN=RPPL1 PE=3 SV=1; tr|M5W2F8|M5W2F8_PRUPE Uncharacterized protein OS=Prunus persica GN=PRUPE_ppa024822mg PE=3 SV=1	Activation of caspases through apoptosome-mediated cleavage; ADP binding; Coil; DISEASERSIST; Formation of apoptosome; L domain-like; LEUCINE-RICH REPEAT-CONTAINING PROTEIN; LRR_dom_sf; NB-ARC; Neutrophil degranulation; P-loop containing nucleoside triphosphate hydrolases; P-loop_NTPase; SUBFAMILY NOT NAMED; TP53 Regulates Transcription of Caspase Activators and Caspases; Transcriptional Regulati…	ADP binding	GO:0043531
RC5G0370200	mRNA:RC5G0370200	Rosa chinensis	mRNA	Rosa chinensis Whole Genome v1.0 Assembly & Annotation	Chr05	36020158	36024058	Chr05:36020158..36024058	AT3G14470.1 | Symbols: | NB-ARC domain-containing disease resistance protein | chr3:4857940-4861104 FORWARD LENGTH=1054; PREDICTED: putative disease resistance protein At3g14460 [Fragaria vesca subsp. vesca]; Putative disease resistance RPP13-like protein 1 OS=Arabidopsis thaliana GN=RPPL1 PE=3 SV=1; tr|M5WIY5|M5WIY5_PRUPE Uncharacterized protein OS=Prunus persica GN=PRUPE_ppa015043mg PE=3 SV=1	Activation of caspases through apoptosome-mediated cleavage; ADP binding; Coil; DISEASERSIST; Formation of apoptosome; L domain-like; LEUCINE-RICH REPEAT-CONTAINING PROTEIN; LRR_dom_sf; NB-ARC; Neutrophil degranulation; P-loop containing nucleoside triphosphate hydrolases; P-loop_NTPase; SUBFAMILY NOT NAMED; TP53 Regulates Transcription of Caspase Activators and Caspases; Transcriptional Regulati…	ADP binding	GO:0043531
RC5G0370400	mRNA:RC5G0370400	Rosa chinensis	mRNA	Rosa chinensis Whole Genome v1.0 Assembly & Annotation	Chr05	36049700	36058870	Chr05:36049700..36058870	AT3G14470.1 | Symbols: | NB-ARC domain-containing disease resistance protein | chr3:4857940-4861104 FORWARD LENGTH=1054; PREDICTED: putative disease resistance protein At3g14460 [Fragaria vesca subsp. vesca]; Putative disease resistance RPP13-like protein 1 OS=Arabidopsis thaliana GN=RPPL1 PE=3 SV=1; tr|M5WIY5|M5WIY5_PRUPE Uncharacterized protein OS=Prunus persica GN=PRUPE_ppa015043mg PE=3 SV=1	Activation of caspases through apoptosome-mediated cleavage; ADP binding; Coil; DISEASERSIST; Formation of apoptosome; L domain-like; LEUCINE-RICH REPEAT-CONTAINING PROTEIN; Leu-rich_rpt; LRR; LRR_8; LRR_dom_sf; NB-ARC; Neutrophil degranulation; P-loop containing nucleoside triphosphate hydrolases; P-loop_NTPase; protein binding; SUBFAMILY NOT NAMED; TP53 Regulates Transcription of Caspase Activa…	ADP binding; protein binding	GO:0005515; GO:0043531
RC5G0370500	mRNA:RC5G0370500	Rosa chinensis	mRNA	Rosa chinensis Whole Genome v1.0 Assembly & Annotation	Chr05	36084919	36091522	Chr05:36084919..36091522	AT3G14470.1 | Symbols: | NB-ARC domain-containing disease resistance protein | chr3:4857940-4861104 FORWARD LENGTH=1054; PREDICTED: putative disease resistance protein At3g14460 [Fragaria vesca subsp. vesca]; Putative disease resistance RPP13-like protein 1 OS=Arabidopsis thaliana GN=RPPL1 PE=3 SV=1; tr|M5W2F8|M5W2F8_PRUPE Uncharacterized protein OS=Prunus persica GN=PRUPE_ppa024822mg PE=3 SV=1	Activation of caspases through apoptosome-mediated cleavage; ADP binding; DISEASERSIST; Formation of apoptosome; L domain-like; LEUCINE-RICH REPEAT-CONTAINING PROTEIN; Leu-rich_rpt; LRR_8; LRR_dom_sf; NB-ARC; Neutrophil degranulation; P-loop containing nucleoside triphosphate hydrolases; P-loop_NTPase; protein binding; SUBFAMILY NOT NAMED; TP53 Regulates Transcription of Caspase Activators and Ca…	ADP binding; protein binding	GO:0005515; GO:0043531
RC5G0370800	mRNA:RC5G0370800	Rosa chinensis	mRNA	Rosa chinensis Whole Genome v1.0 Assembly & Annotation	Chr05	36124042	36132140	Chr05:36124042..36132140	AT3G14470.1 | Symbols: | NB-ARC domain-containing disease resistance protein | chr3:4857940-4861104 FORWARD LENGTH=1054; PREDICTED: putative disease resistance protein At3g14460 [Fragaria vesca subsp. vesca]; Putative disease resistance RPP13-like protein 1 OS=Arabidopsis thaliana GN=RPPL1 PE=3 SV=1; tr|M5W2F8|M5W2F8_PRUPE Uncharacterized protein OS=Prunus persica GN=PRUPE_ppa024822mg PE=3 SV=1	Activation of caspases through apoptosome-mediated cleavage; ADP binding; DISEASERSIST; Formation of apoptosome; L domain-like; LEUCINE-RICH REPEAT-CONTAINING PROTEIN; Leu-rich_rpt; LRR_8; LRR_dom_sf; NB-ARC; Neutrophil degranulation; P-loop containing nucleoside triphosphate hydrolases; P-loop_NTPase; protein binding; SUBFAMILY NOT NAMED; TP53 Regulates Transcription of Caspase Activators and Ca…	ADP binding; protein binding	GO:0005515; GO:0043531
RC5G0371100	mRNA:RC5G0371100	Rosa chinensis	mRNA	Rosa chinensis Whole Genome v1.0 Assembly & Annotation	Chr05	36172573	36178226	Chr05:36172573..36178226	AT3G14470.1 | Symbols: | NB-ARC domain-containing disease resistance protein | chr3:4857940-4861104 FORWARD LENGTH=1054; PREDICTED: putative disease resistance protein At3g14460 [Prunus mume]; Putative disease resistance RPP13-like protein 1 OS=Arabidopsis thaliana GN=RPPL1 PE=3 SV=1; tr|M5W2F8|M5W2F8_PRUPE Uncharacterized protein OS=Prunus persica GN=PRUPE_ppa024822mg PE=3 SV=1	Activation of caspases through apoptosome-mediated cleavage; ADP binding; Coil; DISEASERSIST; Formation of apoptosome; L domain-like; LEUCINE-RICH REPEAT-CONTAINING PROTEIN; LRR_dom_sf; NB-ARC; Neutrophil degranulation; P-loop containing nucleoside triphosphate hydrolases; P-loop_NTPase; SUBFAMILY NOT NAMED; TP53 Regulates Transcription of Caspase Activators and Caspases; Transcriptional Regulati…	ADP binding	GO:0043531
RC5G0376400	mRNA:RC5G0376400	Rosa chinensis	mRNA	Rosa chinensis Whole Genome v1.0 Assembly & Annotation	Chr05	36979080	36981422	Chr05:36979080..36981422	AT3G14470.1 | Symbols: | NB-ARC domain-containing disease resistance protein | chr3:4857940-4861104 FORWARD LENGTH=1054; PREDICTED: putative disease resistance protein At3g14460 [Pyrus x bretschneideri] &gt;gi|1079260154|ref|XP_018501048.1| PREDICTED: putative disease resistance protein At3g14460 [Pyrus x bretschneideri]; Putative disease resistance RPP13-like protein 1 OS=Arabidopsis thaliana GN…	Activation of caspases through apoptosome-mediated cleavage; ADP binding; Coil; DISEASERSIST; Formation of apoptosome; L domain-like; LEUCINE-RICH REPEAT-CONTAINING PROTEIN; LRR_dom_sf; NB-ARC; Neutrophil degranulation; P-loop containing nucleoside triphosphate hydrolases; P-loop_NTPase; SUBFAMILY NOT NAMED; TP53 Regulates Transcription of Caspase Activators and Caspases; Transcriptional Regulati…	ADP binding	GO:0043531
RC5G0380100	mRNA:RC5G0380100	Rosa chinensis	mRNA	Rosa chinensis Whole Genome v1.0 Assembly & Annotation	Chr05	37676714	37680378	Chr05:37676714..37680378	AT3G14460.1 | Symbols: | LRR and NB-ARC domains-containing disease resistance protein | chr3:4851990-4856264 REVERSE LENGTH=1424; PREDICTED: putative disease resistance RPP13-like protein 1 [Fragaria vesca subsp. vesca] &gt;gi|764603706|ref|XP_004303061.2| PREDICTED: putative disease resistance RPP13-like protein 1 [Fragaria vesca subsp. vesca]; Putative disease resistance protein At3g14460 OS=Ar…	L domain-like; LEUCINE-RICH REPEAT-CONTAINING PROTEIN; LRR_dom_sf; SUBFAMILY NOT NAMED
RC5G0380200	mRNA:RC5G0380200	Rosa chinensis	mRNA	Rosa chinensis Whole Genome v1.0 Assembly & Annotation	Chr05	37680567	37683462	Chr05:37680567..37683462	AT3G14470.1 | Symbols: | NB-ARC domain-containing disease resistance protein | chr3:4857940-4861104 FORWARD LENGTH=1054; PREDICTED: putative disease resistance RPP13-like protein 1 [Prunus mume]; Putative disease resistance RPP13-like protein 1 OS=Arabidopsis thaliana GN=RPPL1 PE=3 SV=1; tr|M5XHK4|M5XHK4_PRUPE Uncharacterized protein OS=Prunus persica GN=PRUPE_ppa024377mg PE=3 SV=1	AAA; Activation of caspases through apoptosome-mediated cleavage; ADP binding; Coil; DISEASERSIST; Formation of apoptosome; L domain-like; LEUCINE-RICH REPEAT-CONTAINING PROTEIN; LRR_dom_sf; NB-ARC; Neutrophil degranulation; P-loop containing nucleoside triphosphate hydrolases; P-loop_NTPase; RX-CC_like; SUBFAMILY NOT NAMED; TP53 Regulates Transcription of Caspase Activators and Caspases; Transcr…	ADP binding	GO:0043531
RC5G0403300	mRNA:RC5G0403300	Rosa chinensis	mRNA	Rosa chinensis Whole Genome v1.0 Assembly & Annotation	Chr05	40299954	40303988	Chr05:40299954..40303988	AT3G14470.1 | Symbols: | NB-ARC domain-containing disease resistance protein | chr3:4857940-4861104 FORWARD LENGTH=1054; PREDICTED: putative disease resistance protein At3g14460 [Fragaria vesca subsp. vesca]; Putative disease resistance RPP13-like protein 1 OS=Arabidopsis thaliana GN=RPPL1 PE=3 SV=1; tr|M5WIY5|M5WIY5_PRUPE Uncharacterized protein OS=Prunus persica GN=PRUPE_ppa015043mg PE=3 SV=1	Activation of caspases through apoptosome-mediated cleavage; ADP binding; Coil; DISEASERSIST; Formation of apoptosome; L domain-like; LEUCINE-RICH REPEAT-CONTAINING PROTEIN; LRR_dom_sf; NB-ARC; Neutrophil degranulation; P-loop containing nucleoside triphosphate hydrolases; P-loop_NTPase; Rcpt_L-dom_sf; SUBFAMILY NOT NAMED; TP53 Regulates Transcription of Caspase Activators and Caspases; Transcrip…	ADP binding	GO:0043531
RC5G0403400	mRNA:RC5G0403400	Rosa chinensis	mRNA	Rosa chinensis Whole Genome v1.0 Assembly & Annotation	Chr05	40304850	40309182	Chr05:40304850..40309182	AT3G14470.1 | Symbols: | NB-ARC domain-containing disease resistance protein | chr3:4857940-4861104 FORWARD LENGTH=1054; PREDICTED: putative disease resistance RPP13-like protein 1 [Prunus mume]; Putative disease resistance RPP13-like protein 1 OS=Arabidopsis thaliana GN=RPPL1 PE=3 SV=1; tr|M5W2F8|M5W2F8_PRUPE Uncharacterized protein OS=Prunus persica GN=PRUPE_ppa024822mg PE=3 SV=1	Coil; DISEASE RESISTANCE RPP13-LIKE PROTEIN 1-RELATED; LEUCINE-RICH REPEAT-CONTAINING PROTEIN
RC5G0287200	mRNA:RC5G0287200	Rosa chinensis	mRNA	Rosa chinensis Whole Genome v1.0 Assembly & Annotation	Chr05	25086974	25087778	Chr05:25086974..25087778	60S acidic ribosomal protein P1 OS=Zea mays GN=RPP1A PE=1 SV=1; AT5G24510.1 | Symbols: | 60S acidic ribosomal protein family | chr5:8369295-8369866 REVERSE LENGTH=111; PREDICTED: 60S acidic ribosomal protein P1-like [Fragaria vesca subsp. vesca]; tr|A0A059DF41|A0A059DF41_EUCGR Uncharacterized protein OS=Eucalyptus grandis GN=EUGRSUZ_A01408 PE=3 SV=1	60S ACIDIC RIBOSOMAL PROTEIN FAMILY MEMBER; 60S ACIDIC RIBOSOMAL PROTEIN P1-1-RELATED; disorder_prediction; Eukaryotic Translation Termination; Formation of a pool of free 40S subunits; GTP hydrolysis and joining of the 60S ribosomal subunit; intracellular; L13a-mediated translational silencing of Ceruloplasmin expression; Major pathway of rRNA processing in the nucleolus and cytosol; Nonsense Me…	intracellular; ribosome; structural constituent of ribosome; translational elongation	GO:0003735; GO:0005622; GO:0005840; GO:0006414
RC5G0289600	mRNA:RC5G0289600	Rosa chinensis	mRNA	Rosa chinensis Whole Genome v1.0 Assembly & Annotation	Chr05	25501220	25503545	Chr05:25501220..25503545	60S ribosomal protein L7a-2 OS=Oryza sativa subsp. japonica GN=RPL7A-2 PE=2 SV=1; 60S ribosomal protein L7a [Ananas comosus]; AT3G62870.1 | Symbols: | Ribosomal protein L7Ae/L30e/S12e/Gadd45 family protein | chr3:23242862-23244273 REVERSE LENGTH=256; tr|A0A199VZ63|A0A199VZ63_ANACO 60S ribosomal protein L7a OS=Ananas comosus GN=ACMD2_16073 PE=4 SV=1	60S RIBOSOMAL PROTEIN L7A-1-RELATED; Eukaryotic Translation Termination; Formation of a pool of free 40S subunits; GTP hydrolysis and joining of the 60S ribosomal subunit; L13a-mediated translational silencing of Ceruloplasmin expression; L30e-like; Major pathway of rRNA processing in the nucleolus and cytosol; Nonsense Mediated Decay (NMD) enhanced by the Exon Junction Complex (EJC); Nonsense Me…
RC5G0291100	mRNA:RC5G0291100	Rosa chinensis	mRNA	Rosa chinensis Whole Genome v1.0 Assembly & Annotation	Chr05	25676750	25680711	Chr05:25676750..25680711	AT1G53120.1 | Symbols: | RNA-binding S4 domain-containing protein | chr1:19792798-19794605 FORWARD LENGTH=320; PREDICTED: uncharacterized protein LOC101301096 [Fragaria vesca subsp. vesca]; Putative RNA-binding protein YlmH OS=Bacillus subtilis (strain 168) GN=ylmH PE=4 SV=1; tr|M5WKK1|M5WKK1_PRUPE Uncharacterized protein (Fragment) OS=Prunus persica GN=PRUPE_ppa016812mg PE=4 SV=1	Alpha-L RNA-binding motif; Eukaryotic Translation Termination; FAMILY NOT NAMED; Formation of a pool of free 40S subunits; Formation of the ternary complex, and subsequently, the 43S complex; GTP hydrolysis and joining of the 60S ribosomal subunit; L13a-mediated translational silencing of Ceruloplasmin expression; Major pathway of rRNA processing in the nucleolus and cytosol; Nonsense Mediated De…	RNA binding	GO:0003723
RC5G0291200	mRNA:RC5G0291200	Rosa chinensis	mRNA	Rosa chinensis Whole Genome v1.0 Assembly & Annotation	Chr05	25687274	25688858	Chr05:25687274..25688858	60S ribosomal protein L8-3 OS=Arabidopsis thaliana GN=RPL8C PE=2 SV=2; AT4G36130.1 | Symbols: | Ribosomal protein L2 family | chr4:17097613-17098656 FORWARD LENGTH=258; PREDICTED: 60S ribosomal protein L8-3 [Fragaria vesca subsp. vesca] &gt;gi|470120872|ref|XP_004296511.1| PREDICTED: 60S ribosomal protein L8-3 [Fragaria vesca subsp. vesca]; tr|M5WP60|M5WP60_PRUPE Uncharacterized protein OS=Prunus…	60S RIBOSOMAL PROTEIN L8-2-RELATED; disorder_prediction; Eukaryotic Translation Termination; Formation of a pool of free 40S subunits; GTP hydrolysis and joining of the 60S ribosomal subunit; intracellular; L13a-mediated translational silencing of Ceruloplasmin expression; large ribosomal subunit; Major pathway of rRNA processing in the nucleolus and cytosol; NA-bd_OB-fold; Nonsense Mediated Deca…	intracellular; large ribosomal subunit; ribosome; RNA binding; structural constituent of ribosome; translation	GO:0003723; GO:0003735; GO:0005622; GO:0005840; GO:0006412; GO:0015934
RC5G0294600	mRNA:RC5G0294600	Rosa chinensis	mRNA	Rosa chinensis Whole Genome v1.0 Assembly & Annotation	Chr05	26003128	26003478	Chr05:26003128..26003478	60S acidic ribosomal protein P2 OS=Parthenium argentatum PE=3 SV=1; AT3G44590.1 | Symbols: | 60S acidic ribosomal protein family | chr3:16163983-16164658 FORWARD LENGTH=111; PREDICTED: 60S acidic ribosomal protein P2B-like [Fragaria vesca subsp. vesca]; tr|A0A103XH98|A0A103XH98_CYNCS Ribosomal protein 60S OS=Cynara cardunculus var. scolymus GN=Ccrd_007292 PE=3 SV=1	60S ACIDIC RIBOSOMAL PROTEIN FAMILY MEMBER; 60S ACIDIC RIBOSOMAL PROTEIN P2-3-RELATED; disorder_prediction; Eukaryotic Translation Termination; Formation of a pool of free 40S subunits; GTP hydrolysis and joining of the 60S ribosomal subunit; intracellular; L13a-mediated translational silencing of Ceruloplasmin expression; Major pathway of rRNA processing in the nucleolus and cytosol; Nonsense Me…	intracellular; ribosome; structural constituent of ribosome; translational elongation	GO:0003735; GO:0005622; GO:0005840; GO:0006414
RC5G0338500	mRNA:RC5G0338500	Rosa chinensis	mRNA	Rosa chinensis Whole Genome v1.0 Assembly & Annotation	Chr05	31815800	31816193	Chr05:31815800..31816193	60S ribosomal protein L7a-1 [Arachis duranensis] &gt;gi|1021501131|ref|XP_016193793.1| 60S ribosomal protein L7a-1 [Arachis ipaensis]; 60S ribosomal protein L7a-2 OS=Oryza sativa subsp. japonica GN=RPL7A-2 PE=2 SV=1; AT3G62870.1 | Symbols: | Ribosomal protein L7Ae/L30e/S12e/Gadd45 family protein | chr3:23242862-23244273 REVERSE LENGTH=256; tr|C5X592|C5X592_SORBI Uncharacterized protein OS=Sorghum…	60S RIBOSOMAL PROTEIN L7A-1-RELATED; Eukaryotic Translation Termination; Formation of a pool of free 40S subunits; GTP hydrolysis and joining of the 60S ribosomal subunit; L13a-mediated translational silencing of Ceruloplasmin expression; L30e-like; L7ARS6FAMILY; Major pathway of rRNA processing in the nucleolus and cytosol; Nonsense Mediated Decay (NMD) enhanced by the Exon Junction Complex (EJC…
RC5G0352100	mRNA:RC5G0352100	Rosa chinensis	mRNA	Rosa chinensis Whole Genome v1.0 Assembly & Annotation	Chr05	33490856	33491919	Chr05:33490856..33491919	AT5G41010.1 | Symbols: NRPB12, NRPD12, NRPE12 | DNA directed RNA polymerase, 7 kDa subunit | chr5:16424050-16424921 FORWARD LENGTH=51; DNA-directed RNA polymerases II, IV and V subunit 12 OS=Arabidopsis thaliana GN=NRPB12 PE=1 SV=1; hypothetical protein PRUPE_4G215400 [Prunus persica]; tr|M5WMS8|M5WMS8_PRUPE Uncharacterized protein OS=Prunus persica GN=PRUPE_ppa027065mg PE=4 SV=1	Abortive elongation of HIV-1 transcript in the absence of Tat; Activation of anterior HOX genes in hindbrain development during early embryogenesis; B-WICH complex positively regulates rRNA expression; Cytosolic sensors of pathogen-associated DNA; DNA binding; DNA-directed 5'-3' RNA polymerase activity; DNA-DIRECTED RNA POLYMERASES I, II, AND III; DNA_RNApol_7kD; Dual incision in TC-NER; FGFR2 al…	DNA binding; DNA-directed RNA polymerase activity; transcription, DNA-dependent	GO:0003677; GO:0003899; GO:0006351
RC5G0352600	mRNA:RC5G0352600	Rosa chinensis	mRNA	Rosa chinensis Whole Genome v1.0 Assembly & Annotation	Chr05	33516842	33517544	Chr05:33516842..33517544	60S ribosomal protein L18a OS=Oryza sativa subsp. japonica GN=RPL18A PE=1 SV=1; AT2G34480.1 | Symbols: | Ribosomal protein L18ae/LX family protein | chr2:14532916-14534161 REVERSE LENGTH=178; tr|V7BJQ2|V7BJQ2_PHAVU 60S ribosomal protein L18a OS=Phaseolus vulgaris GN=PHAVU_006G022700g PE=3 SV=1	60S RIBOSOMAL PROTEIN L18A; Eukaryotic Translation Termination; Formation of a pool of free 40S subunits; GTP hydrolysis and joining of the 60S ribosomal subunit; L13a-mediated translational silencing of Ceruloplasmin expression; Major pathway of rRNA processing in the nucleolus and cytosol; Nonsense Mediated Decay (NMD) enhanced by the Exon Junction Complex (EJC); Nonsense Mediated Decay (NMD) i…	ribosome; structural constituent of ribosome; translation	GO:0003735; GO:0005840; GO:0006412
RC5G0353700	mRNA:RC5G0353700	Rosa chinensis	mRNA	Rosa chinensis Whole Genome v1.0 Assembly & Annotation	Chr05	33687764	33688313	Chr05:33687764..33688313	60S ribosomal protein L2, mitochondrial OS=Oryza sativa subsp. japonica GN=RPL2 PE=2 SV=2; AT2G44065.2 | Symbols: | Ribosomal protein L2 family | chr2:18228860-18230368 FORWARD LENGTH=214; PREDICTED: 60S ribosomal protein L2, mitochondrial [Fragaria vesca subsp. vesca]; tr|M5WJA2|M5WJA2_PRUPE Uncharacterized protein OS=Prunus persica GN=PRUPE_ppa012344mg PE=4 SV=1	60S RIBOSOMAL PROTEIN L2-RELATED; disorder_prediction; Eukaryotic Translation Termination; Formation of a pool of free 40S subunits; GTP hydrolysis and joining of the 60S ribosomal subunit; intracellular; L13a-mediated translational silencing of Ceruloplasmin expression; Major pathway of rRNA processing in the nucleolus and cytosol; Nonsense Mediated Decay (NMD) enhanced by the Exon Junction Comp…	intracellular; ribosome; structural constituent of ribosome; translation	GO:0003735; GO:0005622; GO:0005840; GO:0006412
RC5G0370300	mRNA:RC5G0370300	Rosa chinensis	mRNA	Rosa chinensis Whole Genome v1.0 Assembly & Annotation	Chr05	36045128	36045992	Chr05:36045128..36045992	AT2G04630.1 | Symbols: NRPB6B, NRPE6B | RNA polymerase Rpb6 | chr2:1619168-1620246 REVERSE LENGTH=144; DNA-directed RNA polymerase II subunit protein isoform 2 [Theobroma cacao]; DNA-directed RNA polymerases II and V subunit 6B OS=Arabidopsis thaliana GN=NRPB6B PE=1 SV=1; tr|A0A061G1N0|A0A061G1N0_THECC DNA-directed RNA polymerase II subunit protein isoform 2 OS=Theobroma cacao GN=TCM_015104 PE=4 …	Abortive elongation of HIV-1 transcript in the absence of Tat; Activation of anterior HOX genes in hindbrain development during early embryogenesis; B-WICH complex positively regulates rRNA expression; Coil; Cytosolic sensors of pathogen-associated DNA; DNA binding; DNA-directed 5'-3' RNA polymerase activity; Dual incision in TC-NER; FGFR2 alternative splicing; Formation of HIV-1 elongation compl…	DNA binding; DNA-directed RNA polymerase activity; transcription, DNA-dependent	GO:0003677; GO:0003899; GO:0006351
RC5G0371200	mRNA:RC5G0371200	Rosa chinensis	mRNA	Rosa chinensis Whole Genome v1.0 Assembly & Annotation	Chr05	36178728	36181097	Chr05:36178728..36181097	60S ribosomal protein L10a OS=Oryza sativa subsp. japonica GN=RPL10A PE=1 SV=1; AT1G08360.1 | Symbols: | Ribosomal protein L1p/L10e family | chr1:2636231-2637694 FORWARD LENGTH=216; PREDICTED: 60S ribosomal protein L10a-1 [Fragaria vesca subsp. vesca]; tr|M5WJU5|M5WJU5_PRUPE Ribosomal protein OS=Prunus persica GN=PRUPE_ppa011284mg PE=3 SV=1	60S RIBOSOMAL PROTEIN L10A-1-RELATED; Eukaryotic Translation Termination; Formation of a pool of free 40S subunits; GTP hydrolysis and joining of the 60S ribosomal subunit; L13a-mediated translational silencing of Ceruloplasmin expression; large ribosomal subunit; Major pathway of rRNA processing in the nucleolus and cytosol; Nonsense Mediated Decay (NMD) enhanced by the Exon Junction Complex (EJ…	large ribosomal subunit; RNA binding; structural constituent of ribosome; translation	GO:0003723; GO:0003735; GO:0006412; GO:0015934
RC5G0383100	mRNA:RC5G0383100	Rosa chinensis	mRNA	Rosa chinensis Whole Genome v1.0 Assembly & Annotation	Chr05	37972911	37975115	Chr05:37972911..37975115	40S ribosomal protein S8 OS=Zea mays GN=RPS8 PE=2 SV=2; AT5G59240.1 | Symbols: | Ribosomal protein S8e family protein | chr5:23902626-23903670 REVERSE LENGTH=210; tr|I3SIQ8|I3SIQ8_LOTJA 40S ribosomal protein S8 OS=Lotus japonicus PE=2 SV=1; unknown [Lotus japonicus]	40S RIBOSOMAL PROTEIN S8; 40S RIBOSOMAL PROTEIN S8-1; Coil; disorder_prediction; Eukaryotic Translation Termination; Formation of a pool of free 40S subunits; Formation of the ternary complex, and subsequently, the 43S complex; GTP hydrolysis and joining of the 60S ribosomal subunit; intracellular; L13a-mediated translational silencing of Ceruloplasmin expression; Major pathway of rRNA processing…	intracellular; ribosome; structural constituent of ribosome; translation	GO:0003735; GO:0005622; GO:0005840; GO:0006412
RC5G0387100	mRNA:RC5G0387100	Rosa chinensis	mRNA	Rosa chinensis Whole Genome v1.0 Assembly & Annotation	Chr05	38277587	38280266	Chr05:38277587..38280266	40S ribosomal protein S15a-5 OS=Arabidopsis thaliana GN=RPS15AE PE=2 SV=1; AT4G29430.1 | Symbols: rps15ae | ribosomal protein S15A E | chr4:14472440-14473383 FORWARD LENGTH=129; PREDICTED: 40S ribosomal protein S15a-2-like [Fragaria vesca subsp. vesca]; tr|M5WVQ2|M5WVQ2_PRUPE Uncharacterized protein OS=Prunus persica GN=PRUPE_ppa013332mg PE=4 SV=1	40S RIBOSOMAL PROTEIN S15A; 40S RIBOSOMAL PROTEIN S15A-2-RELATED; Eukaryotic Translation Termination; Formation of a pool of free 40S subunits; Formation of the ternary complex, and subsequently, the 43S complex; GTP hydrolysis and joining of the 60S ribosomal subunit; L13a-mediated translational silencing of Ceruloplasmin expression; Major pathway of rRNA processing in the nucleolus and cytosol;…	ribosome; structural constituent of ribosome; translation	GO:0003735; GO:0005840; GO:0006412
RC5G0388000	mRNA:RC5G0388000	Rosa chinensis	mRNA	Rosa chinensis Whole Genome v1.0 Assembly & Annotation	Chr05	38444671	38445233	Chr05:38444671..38445233	60S ribosomal protein L5 OS=Cucumis sativus GN=RPL5 PE=2 SV=1; AT3G25520.2 | Symbols: ATL5 | ribosomal protein L5 | chr3:9269573-9270434 REVERSE LENGTH=190; PREDICTED: 60S ribosomal protein L5 [Fragaria vesca subsp. vesca]; tr|A0A0D2VLU5|A0A0D2VLU5_GOSRA Uncharacterized protein OS=Gossypium raimondii GN=B456_011G133700 PE=3 SV=1	5S rRNA binding; 60S RIBOSOMAL PROTEIN L5-1-RELATED; Eukaryotic Translation Termination; Formation of a pool of free 40S subunits; GTP hydrolysis and joining of the 60S ribosomal subunit; intracellular; L13a-mediated translational silencing of Ceruloplasmin expression; Major pathway of rRNA processing in the nucleolus and cytosol; Nonsense Mediated Decay (NMD) enhanced by the Exon Junction Comple…	5S rRNA binding; intracellular; ribosome; structural constituent of ribosome; translation	GO:0003735; GO:0005622; GO:0005840; GO:0006412; GO:0008097
RC5G0397400	mRNA:RC5G0397400	Rosa chinensis	mRNA	Rosa chinensis Whole Genome v1.0 Assembly & Annotation	Chr05	39488283	39490250	Chr05:39488283..39490250	60S acidic ribosomal protein P2B [Sesamum indicum]; 60S acidic ribosomal protein P2 OS=Parthenium argentatum PE=3 SV=1; AT3G44590.1 | Symbols: | 60S acidic ribosomal protein family | chr3:16163983-16164658 FORWARD LENGTH=111; tr|A0A0B0N7U2|A0A0B0N7U2_GOSAR 60S acidic ribosomal P2 OS=Gossypium arboreum GN=F383_07943 PE=3 SV=1	60S ACIDIC RIBOSOMAL PROTEIN FAMILY MEMBER; 60S ACIDIC RIBOSOMAL PROTEIN P2-1-RELATED; disorder_prediction; Eukaryotic Translation Termination; Formation of a pool of free 40S subunits; GTP hydrolysis and joining of the 60S ribosomal subunit; intracellular; L13a-mediated translational silencing of Ceruloplasmin expression; Major pathway of rRNA processing in the nucleolus and cytosol; Nonsense Me…	intracellular; ribosome; structural constituent of ribosome; translational elongation	GO:0003735; GO:0005622; GO:0005840; GO:0006414
RC5G0254700	mRNA:RC5G0254700	Rosa chinensis	mRNA	Rosa chinensis Whole Genome v1.0 Assembly & Annotation	Chr05	21614563	21616935	Chr05:21614563..21616935	AT5G36930.1 | Symbols: | Disease resistance protein (TIR-NBS-LRR class) family | chr5:14567771-14571907 REVERSE LENGTH=1188; hypothetical protein PRUPE_2G055200 [Prunus persica]; TMV resistance protein N OS=Nicotiana glutinosa GN=N PE=1 SV=1; tr|M5XPA6|M5XPA6_PRUPE Uncharacterized protein OS=Prunus persica GN=PRUPE_ppa025310mg PE=4 SV=1	AAA; Activation of caspases through apoptosome-mediated cleavage; ADP binding; DISEASERSIST; Formation of apoptosome; L domain-like; LEUCINE-RICH REPEAT-CONTAINING PROTEIN; LRR_dom_sf; NB-ARC; Neutrophil degranulation; P-loop containing nucleoside triphosphate hydrolases; P-loop_NTPase; protein binding; &quot;Winged helix&quot; DNA-binding domain; signal transduction; TIR; TIR_dom; Toll/Interleuk…	ADP binding; protein binding; signal transduction	GO:0005515; GO:0007165; GO:0043531
RC5G0311000	mRNA:RC5G0311000	Rosa chinensis	mRNA	Rosa chinensis Whole Genome v1.0 Assembly & Annotation	Chr05	27834381	27838222	Chr05:27834381..27838222	AT1G27180.1 | Symbols: | disease resistance protein (TIR-NBS-LRR class), putative | chr1:9439859-9445818 FORWARD LENGTH=1556; PREDICTED: uncharacterized protein LOC105350848 [Fragaria vesca subsp. vesca]; TMV resistance protein N OS=Nicotiana glutinosa GN=N PE=1 SV=1; tr|A0A151SPQ2|A0A151SPQ2_CAJCA TMV resistance protein N OS=Cajanus cajan GN=KK1_003062 PE=4 SV=1	Coil; LEUCINE-RICH REPEAT-CONTAINING PROTEIN; protein binding; signal transduction; TIR; TIR_dom; Toll/Interleukin receptor TIR domain; Toll_tir_struct_dom_sf	protein binding; signal transduction	GO:0005515; GO:0007165
RC5G0347300	mRNA:RC5G0347300	Rosa chinensis	mRNA	Rosa chinensis Whole Genome v1.0 Assembly & Annotation	Chr05	32938503	32942776	Chr05:32938503..32942776	AT4G12010.1 | Symbols: | Disease resistance protein (TIR-NBS-LRR class) family | chr4:7197325-7201393 REVERSE LENGTH=1219; PREDICTED: TMV resistance protein N-like [Fragaria vesca subsp. vesca]; TMV resistance protein N OS=Nicotiana glutinosa GN=N PE=1 SV=1; tr|A0A1S4E097|A0A1S4E097_CUCME putative disease resistance protein At4g11170 OS=Cucumis melo GN=LOC107991329 PE=4 SV=1	LEUCINE-RICH REPEAT-CONTAINING PROTEIN; protein binding; signal transduction; SUBFAMILY NOT NAMED; TIR; TIR_dom; Toll/Interleukin receptor TIR domain; Toll_tir_struct_dom_sf	protein binding; signal transduction	GO:0005515; GO:0007165
RC5G0380600	mRNA:RC5G0380600	Rosa chinensis	mRNA	Rosa chinensis Whole Genome v1.0 Assembly & Annotation	Chr05	37706784	37712068	Chr05:37706784..37712068	AT5G17680.1 | Symbols: | disease resistance protein (TIR-NBS-LRR class), putative | chr5:5822999-5827153 FORWARD LENGTH=1294; Disease resistance-like protein CSA1 OS=Arabidopsis thaliana GN=CSA1 PE=4 SV=1; PREDICTED: inactive disease resistance protein RPS4-like [Pyrus x bretschneideri]; tr|W9SEL1|W9SEL1_9ROSA TMV resistance protein N OS=Morus notabilis GN=L484_002409 PE=4 SV=1	FAMILY NOT NAMED; L domain-like; Leu-rich_rpt; LRR; LRR_dom_sf; protein binding	protein binding	GO:0005515
RC5G0239200	mRNA:RC5G0239200	Rosa chinensis	mRNA	Rosa chinensis Whole Genome v1.0 Assembly & Annotation	Chr05	20008883	20010334	Chr05:20008883..20010334	Ankyrin repeat-containing protein At5g02620 OS=Arabidopsis thaliana GN=At5g02620 PE=1 SV=1; AT1G03670.1 | Symbols: | ankyrin repeat family protein | chr1:914222-916222 REVERSE LENGTH=616; PREDICTED: ankyrin repeat-containing protein At5g02620-like [Malus domestica]; tr|M5WLS6|M5WLS6_PRUPE Uncharacterized protein (Fragment) OS=Prunus persica GN=PRUPE_ppa024706mg PE=4 SV=1	ACD6; ANK; Ank_2; ANK_REPEAT; ANK_REP_REGION; Ankyrin repeat; ANKYRIN REPEAT FAMILY PROTEIN-RELATED; Ankyrin_rpt; Ankyrin_rpt-contain_dom; Ankyrin_rpt-contain_sf; cellular response to salicylic acid stimulus; FAMILY NOT NAMED; integral component of membrane; protein binding; regulation of defense response; regulation of salicylic acid mediated signaling pathway	cellular response to salicylic acid stimulus; integral to membrane; protein binding; regulation of defense response; regulation of salicylic acid mediated signaling pathway	GO:0005515; GO:0016021; GO:0031347; GO:0071446; GO:2000031
RC5G0239400	mRNA:RC5G0239400	Rosa chinensis	mRNA	Rosa chinensis Whole Genome v1.0 Assembly & Annotation	Chr05	20035817	20037561	Chr05:20035817..20037561	Ankyrin repeat-containing protein At5g02620 OS=Arabidopsis thaliana GN=At5g02620 PE=1 SV=1; AT4G03500.1 | Symbols: | Ankyrin repeat family protein | chr4:1553453-1556571 FORWARD LENGTH=652; PREDICTED: ankyrin repeat-containing protein At5g02620-like isoform X1 [Fragaria vesca subsp. vesca]; tr|M5WNF8|M5WNF8_PRUPE Uncharacterized protein OS=Prunus persica GN=PRUPE_ppa003057mg PE=4 SV=1	ACD6; ANK; Ank_2; ANK_REPEAT; ANK_REP_REGION; Ankyrin repeat; ANKYRIN REPEAT FAMILY PROTEIN-RELATED; Ankyrin_rpt; Ankyrin_rpt-contain_dom; Ankyrin_rpt-contain_sf; cellular response to salicylic acid stimulus; disorder_prediction; FAMILY NOT NAMED; integral component of membrane; PGG; PGG_dom; protein binding; regulation of defense response; regulation of salicylic acid mediated signaling pathway	cellular response to salicylic acid stimulus; integral to membrane; protein binding; regulation of defense response; regulation of salicylic acid mediated signaling pathway	GO:0005515; GO:0016021; GO:0031347; GO:0071446; GO:2000031
RC5G0239500	mRNA:RC5G0239500	Rosa chinensis	mRNA	Rosa chinensis Whole Genome v1.0 Assembly & Annotation	Chr05	20044071	20048678	Chr05:20044071..20048678	Ankyrin-1 OS=Homo sapiens GN=ANK1 PE=1 SV=3; AT1G03670.1 | Symbols: | ankyrin repeat family protein | chr1:914222-916222 REVERSE LENGTH=616; PREDICTED: ankyrin repeat-containing protein At5g02620-like isoform X2 [Fragaria vesca subsp. vesca]; tr|M5WNF8|M5WNF8_PRUPE Uncharacterized protein OS=Prunus persica GN=PRUPE_ppa003057mg PE=4 SV=1	ACD6; ANK; Ank_2; Ank_3; Ank_4; ANK_REPEAT; ANK_REP_REGION; Ankyrin repeat; ANKYRIN REPEAT FAMILY PROTEIN-RELATED; Ankyrin_rpt; Ankyrin_rpt-contain_dom; Ankyrin_rpt-contain_sf; cellular response to salicylic acid stimulus; FAMILY NOT NAMED; integral component of membrane; protein binding; regulation of defense response; regulation of salicylic acid mediated signaling pathway	cellular response to salicylic acid stimulus; integral to membrane; protein binding; regulation of defense response; regulation of salicylic acid mediated signaling pathway	GO:0005515; GO:0016021; GO:0031347; GO:0071446; GO:2000031
RC5G0239800	mRNA:RC5G0239800	Rosa chinensis	mRNA	Rosa chinensis Whole Genome v1.0 Assembly & Annotation	Chr05	20062977	20064224	Chr05:20062977..20064224	Ankyrin repeat-containing protein At5g02620 OS=Arabidopsis thaliana GN=At5g02620 PE=1 SV=1; AT4G03500.1 | Symbols: | Ankyrin repeat family protein | chr4:1553453-1556571 FORWARD LENGTH=652; PREDICTED: ankyrin repeat-containing protein At5g02620-like isoform X1 [Fragaria vesca subsp. vesca]; tr|M5WNF8|M5WNF8_PRUPE Uncharacterized protein OS=Prunus persica GN=PRUPE_ppa003057mg PE=4 SV=1	ACD6; ANK; Ank_2; ANK_REPEAT; ANK_REP_REGION; Ankyrin repeat; ANKYRIN REPEAT FAMILY PROTEIN-RELATED; Ankyrin_rpt; Ankyrin_rpt-contain_dom; Ankyrin_rpt-contain_sf; cellular response to salicylic acid stimulus; FAMILY NOT NAMED; integral component of membrane; PGG; PGG_dom; protein binding; regulation of defense response; regulation of salicylic acid mediated signaling pathway	cellular response to salicylic acid stimulus; integral to membrane; protein binding; regulation of defense response; regulation of salicylic acid mediated signaling pathway	GO:0005515; GO:0016021; GO:0031347; GO:0071446; GO:2000031
RC5G0240200	mRNA:RC5G0240200	Rosa chinensis	mRNA	Rosa chinensis Whole Genome v1.0 Assembly & Annotation	Chr05	20139945	20142281	Chr05:20139945..20142281	Ankyrin repeat-containing protein At5g02620 OS=Arabidopsis thaliana GN=At5g02620 PE=1 SV=1; AT1G03670.1 | Symbols: | ankyrin repeat family protein | chr1:914222-916222 REVERSE LENGTH=616; PREDICTED: ankyrin repeat-containing protein At5g02620-like isoform X1 [Fragaria vesca subsp. vesca]; tr|M5WNF8|M5WNF8_PRUPE Uncharacterized protein OS=Prunus persica GN=PRUPE_ppa003057mg PE=4 SV=1	ACD6; ANK; Ank_2; Ank_4; ANK_REPEAT; ANK_REP_REGION; Ankyrin repeat; ANKYRIN REPEAT FAMILY PROTEIN-RELATED; Ankyrin_rpt; Ankyrin_rpt-contain_dom; Ankyrin_rpt-contain_sf; cellular response to salicylic acid stimulus; FAMILY NOT NAMED; integral component of membrane; PGG; PGG_dom; protein binding; regulation of defense response; regulation of salicylic acid mediated signaling pathway	cellular response to salicylic acid stimulus; integral to membrane; protein binding; regulation of defense response; regulation of salicylic acid mediated signaling pathway	GO:0005515; GO:0016021; GO:0031347; GO:0071446; GO:2000031
RC5G0240500	mRNA:RC5G0240500	Rosa chinensis	mRNA	Rosa chinensis Whole Genome v1.0 Assembly & Annotation	Chr05	20212962	20215477	Chr05:20212962..20215477	Ankyrin repeat-containing protein At5g02620 OS=Arabidopsis thaliana GN=At5g02620 PE=1 SV=1; AT1G03670.1 | Symbols: | ankyrin repeat family protein | chr1:914222-916222 REVERSE LENGTH=616; PREDICTED: ankyrin repeat-containing protein At5g02620-like isoform X1 [Fragaria vesca subsp. vesca]; tr|M5WNF8|M5WNF8_PRUPE Uncharacterized protein OS=Prunus persica GN=PRUPE_ppa003057mg PE=4 SV=1	ACD6; ANK; Ank_2; ANK_REPEAT; ANK_REP_REGION; Ankyrin repeat; ANKYRIN REPEAT FAMILY PROTEIN-RELATED; Ankyrin_rpt; Ankyrin_rpt-contain_dom; Ankyrin_rpt-contain_sf; cellular response to salicylic acid stimulus; FAMILY NOT NAMED; integral component of membrane; PGG; PGG_dom; protein binding; regulation of defense response; regulation of salicylic acid mediated signaling pathway	cellular response to salicylic acid stimulus; integral to membrane; protein binding; regulation of defense response; regulation of salicylic acid mediated signaling pathway	GO:0005515; GO:0016021; GO:0031347; GO:0071446; GO:2000031
RC5G0301800	mRNA:RC5G0301800	Rosa chinensis	mRNA	Rosa chinensis Whole Genome v1.0 Assembly & Annotation	Chr05	26801289	26808352	Chr05:26801289..26808352	AT5G53760.2 | Symbols: MLO11, ATMLO11 | Seven transmembrane MLO family protein | chr5:21823055-21826289 FORWARD LENGTH=573; MLO-like protein 11 OS=Arabidopsis thaliana GN=MLO11 PE=2 SV=1; PREDICTED: MLO-like protein 11 isoform X1 [Fragaria vesca subsp. vesca]; tr|M5WN44|M5WN44_PRUPE MLO-like protein OS=Prunus persica GN=MLO PE=3 SV=1	defense response; FAMILY NOT NAMED; integral component of membrane; Mlo; MLO-LIKE PROTEIN 11-RELATED	defense response; integral to membrane	GO:0006952; GO:0016021
RC5G0308100	mRNA:RC5G0308100	Rosa chinensis	mRNA	Rosa chinensis Whole Genome v1.0 Assembly & Annotation	Chr05	27598341	27599176	Chr05:27598341..27599176	Phytohormone-binding protein OS=Medicago truncatula GN=MTR_3g055120 PE=1 SV=1; PREDICTED: phytohormone-binding protein-like [Fragaria vesca subsp. vesca]; tr|M5X3G2|M5X3G2_PRUPE Uncharacterized protein OS=Prunus persica GN=PRUPE_ppa017195mg PE=4 SV=1	Bet_v_1; Bet v1-like; Bet_v_I/MLP; defense response; FAMILY NOT NAMED; response to biotic stimulus; START-like_dom_sf; SUBFAMILY NOT NAMED	defense response; response to biotic stimulus	GO:0006952; GO:0009607
RC5G0308200	mRNA:RC5G0308200	Rosa chinensis	mRNA	Rosa chinensis Whole Genome v1.0 Assembly & Annotation	Chr05	27600373	27600681	Chr05:27600373..27600681	Phytohormone-binding protein OS=Medicago truncatula GN=MTR_3g055120 PE=1 SV=1; PREDICTED: phytohormone-binding protein-like [Fragaria vesca subsp. vesca]; tr|M5WW21|M5WW21_PRUPE Uncharacterized protein OS=Prunus persica GN=PRUPE_ppa014563mg PE=4 SV=1	Bet_v_1; Bet v1-like; Bet_v_I/MLP; defense response; FAMILY NOT NAMED; response to biotic stimulus; START-like_dom_sf; SUBFAMILY NOT NAMED	defense response; response to biotic stimulus	GO:0006952; GO:0009607
RC5G0308300	mRNA:RC5G0308300	Rosa chinensis	mRNA	Rosa chinensis Whole Genome v1.0 Assembly & Annotation	Chr05	27601221	27601670	Chr05:27601221..27601670	Phytohormone-binding protein OS=Medicago truncatula GN=MTR_3g055120 PE=1 SV=1; PREDICTED: phytohormone-binding protein-like [Fragaria vesca subsp. vesca]; tr|M5WW21|M5WW21_PRUPE Uncharacterized protein OS=Prunus persica GN=PRUPE_ppa014563mg PE=4 SV=1	Bet_v_1; Bet v1-like; Bet_v_I/MLP; defense response; FAMILY NOT NAMED; response to biotic stimulus; START-like_dom_sf; SUBFAMILY NOT NAMED	defense response; response to biotic stimulus	GO:0006952; GO:0009607
RC5G0330600	mRNA:RC5G0330600	Rosa chinensis	mRNA	Rosa chinensis Whole Genome v1.0 Assembly & Annotation	Chr05	30813928	30816234	Chr05:30813928..30816234	AT1G03670.1 | Symbols: | ankyrin repeat family protein | chr1:914222-916222 REVERSE LENGTH=616; protein ACCELERATED CELL DEATH 6 isoform X2 [Prunus persica]; Protein ACCELERATED CELL DEATH 6 OS=Arabidopsis thaliana GN=ACD6 PE=1 SV=1; tr|M5WNX8|M5WNX8_PRUPE Uncharacterized protein OS=Prunus persica GN=PRUPE_ppa025569mg PE=4 SV=1	ACD6; ANK; Ank_2; ANK_REPEAT; ANK_REP_REGION; Ankyrin repeat; ANKYRIN REPEAT FAMILY PROTEIN-RELATED; Ankyrin_rpt; Ankyrin_rpt-contain_dom; Ankyrin_rpt-contain_sf; cellular response to salicylic acid stimulus; FAMILY NOT NAMED; integral component of membrane; PGG; PGG_dom; protein binding; regulation of defense response; regulation of salicylic acid mediated signaling pathway	cellular response to salicylic acid stimulus; integral to membrane; protein binding; regulation of defense response; regulation of salicylic acid mediated signaling pathway	GO:0005515; GO:0016021; GO:0031347; GO:0071446; GO:2000031
RC5G0359500	mRNA:RC5G0359500	Rosa chinensis	mRNA	Rosa chinensis Whole Genome v1.0 Assembly & Annotation	Chr05	34361492	34364394	Chr05:34361492..34364394	AT4G03500.1 | Symbols: | Ankyrin repeat family protein | chr4:1553453-1556571 FORWARD LENGTH=652; PREDICTED: protein ACCELERATED CELL DEATH 6-like [Prunus mume]; Protein ACCELERATED CELL DEATH 6 OS=Arabidopsis thaliana GN=ACD6 PE=1 SV=1; tr|M5VGN4|M5VGN4_PRUPE Uncharacterized protein OS=Prunus persica GN=PRUPE_ppa002427mg PE=4 SV=1	ACD6; ANK; Ank_2; ANK_REPEAT; ANK_REP_REGION; Ankyrin repeat; ANKYRIN REPEAT FAMILY PROTEIN-RELATED; Ankyrin_rpt; Ankyrin_rpt-contain_dom; Ankyrin_rpt-contain_sf; cellular response to salicylic acid stimulus; FAMILY NOT NAMED; integral component of membrane; PGG; PGG_dom; protein binding; regulation of defense response; regulation of salicylic acid mediated signaling pathway	cellular response to salicylic acid stimulus; integral to membrane; protein binding; regulation of defense response; regulation of salicylic acid mediated signaling pathway	GO:0005515; GO:0016021; GO:0031347; GO:0071446; GO:2000031
