# Supplementary material for: Meta-Analysis of Rose Rosette Disease-Resistant Quantitative Trait Loci and a Search for Candidate Genes
Source: Pathogens. 2023 Apr 8;12(4):575. doi: 10.3390/pathogens12040575 (PMC10146096; doi:10.3390/pathogens12040575)
Supplement: Supplementary file 1 [file pathogens-12-00575-s001.zip › TableS11.xlsx]

## Sheet: Sheet 1
Table S11. List of candidate genes discovered in the MetaRRD6.1 interval including name, location, BLAST, functional analysis (InterPro), GO term and GO accession number.qtl6_genes
Name	Unique.Name	Organism	Type	Genome.Transcriptome	Chromosome.Scaffold	Start.position	Stop.position	Location	BLAST	InterPro	GO.Term	GO.Accession
RC6G0093200	mRNA:RC6G0093200	Rosa chinensis	mRNA	Rosa chinensis Whole Genome v1.0 Assembly & Annotation	Chr06	10156940	10162501	Chr06:10156940..10162501	AT3G14470.1 | Symbols: | NB-ARC domain-containing disease resistance protein | chr3:4857940-4861104 FORWARD LENGTH=1054; PREDICTED: putative disease resistance RPP13-like protein 1 [Fragaria vesca subsp. vesca]; Putative disease resistance RPP13-like protein 1 OS=Arabidopsis thaliana GN=RPPL1 PE=3 SV=1; tr|A0A1U7ZQD0|A0A1U7ZQD0_NELNU putative disease resistance protein RGA3 OS=Nelumbo nucifera GN…	Activation of caspases through apoptosome-mediated cleavage; ADP binding; Coil; DISEASERSIST; Formation of apoptosome; L domain-like; LEUCINE-RICH REPEAT-CONTAINING PROTEIN; LRR_dom_sf; NB-ARC; Neutrophil degranulation; P-loop containing nucleoside triphosphate hydrolases; P-loop_NTPase; TP53 Regulates Transcription of Caspase Activators and Caspases; Transcriptional Regulation by E2F6; WH-like_D…	ADP binding	GO:0043531
RC6G0094300	mRNA:RC6G0094300	Rosa chinensis	mRNA	Rosa chinensis Whole Genome v1.0 Assembly & Annotation	Chr06	10342710	10343369	Chr06:10342710..10343369	AT3G14470.1 | Symbols: | NB-ARC domain-containing disease resistance protein | chr3:4857940-4861104 FORWARD LENGTH=1054; PREDICTED: putative disease resistance RPP13-like protein 1 [Theobroma cacao]; Putative disease resistance RPP13-like protein 1 OS=Arabidopsis thaliana GN=RPPL1 PE=3 SV=1; tr|Q6YDD6|Q6YDD6_9FABA Resistance protein (Fragment) OS=Arachis cardenasii PE=4 SV=1	Activation of caspases through apoptosome-mediated cleavage; ADP binding; Formation of apoptosome; LEUCINE-RICH REPEAT-CONTAINING PROTEIN; NB-ARC; Neutrophil degranulation; P-loop containing nucleoside triphosphate hydrolases; P-loop_NTPase; TP53 Regulates Transcription of Caspase Activators and Caspases; Transcriptional Regulation by E2F6; WH-like_DNA-bd_sf	ADP binding	GO:0043531
RC6G0107000	mRNA:RC6G0107000	Rosa chinensis	mRNA	Rosa chinensis Whole Genome v1.0 Assembly & Annotation	Chr06	11477082	11479066	Chr06:11477082..11479066	AT4G27190.1 | Symbols: | NB-ARC domain-containing disease resistance protein | chr4:13620977-13623934 REVERSE LENGTH=985; Disease resistance protein At4g27190 OS=Arabidopsis thaliana GN=At4g27190 PE=2 SV=1; PREDICTED: probable disease resistance protein At4g27220 [Malus domestica] &gt;gi|1039931833|ref|XP_017186274.1| PREDICTED: probable disease resistance protein At4g27220 [Malus domestica] &gt;…	Activation of caspases through apoptosome-mediated cleavage; ADP binding; Coil; DISEASERSIST; FAMILY NOT NAMED; Formation of apoptosome; L domain-like; Leu-rich_rpt; LRR_8; LRR_dom_sf; NB-ARC; Neutrophil degranulation; P-loop containing nucleoside triphosphate hydrolases; P-loop_NTPase; protein binding; SUBFAMILY NOT NAMED; TP53 Regulates Transcription of Caspase Activators and Caspases; Transcri…	ADP binding; protein binding	GO:0005515; GO:0043531
RC6G0083500	mRNA:RC6G0083500	Rosa chinensis	mRNA	Rosa chinensis Whole Genome v1.0 Assembly & Annotation	Chr06	8885020	8885513	Chr06:8885020..8885513	40S ribosomal protein S6 OS=Asparagus officinalis GN=rps6 PE=2 SV=1; AT5G10360.1 | Symbols: EMB3010, RPS6B | Ribosomal protein S6e | chr5:3258734-3260142 REVERSE LENGTH=249; PREDICTED: 40S ribosomal protein S6-like [Fragaria vesca subsp. vesca]; tr|M5VZU7|M5VZU7_PRUPE 40S ribosomal protein S6 OS=Prunus persica GN=PRUPE_ppa010485mg PE=3 SV=1	40S RIBOSOMAL PROTEIN S6; 40S RIBOSOMAL PROTEIN S6-1-RELATED; Eukaryotic Translation Termination; Formation of a pool of free 40S subunits; Formation of the ternary complex, and subsequently, the 43S complex; GTP hydrolysis and joining of the 60S ribosomal subunit; intracellular; L13a-mediated translational silencing of Ceruloplasmin expression; Major pathway of rRNA processing in the nucleolus a…	intracellular; ribosome; structural constituent of ribosome; translation	GO:0003735; GO:0005622; GO:0005840; GO:0006412
RC6G0104000	mRNA:RC6G0104000	Rosa chinensis	mRNA	Rosa chinensis Whole Genome v1.0 Assembly & Annotation	Chr06	11279579	11281008	Chr06:11279579..11281008	ATMG00290.1 | Symbols: RPS4 | mitochondrial ribosomal protein S4 | chrM:82028-83116 REVERSE LENGTH=362; Ribosomal protein S4, mitochondrial OS=Arabidopsis thaliana GN=RPS4 PE=2 SV=2; ribosomal protein S4, partial (mitochondrion) [Malus hupehensis var. mengshanensis]; tr|A0A0U2N8V3|A0A0U2N8V3_9ROSA Ribosomal protein S4 (Fragment) OS=Malus hupehensis var. mengshanensis GN=rps4 PE=4 SV=1	30S 40S RIBOSOMAL PROTEIN; Alpha-L RNA-binding motif; Eukaryotic Translation Termination; Formation of a pool of free 40S subunits; Formation of the ternary complex, and subsequently, the 43S complex; GTP hydrolysis and joining of the 60S ribosomal subunit; L13a-mediated translational silencing of Ceruloplasmin expression; Major pathway of rRNA processing in the nucleolus and cytosol; Nonsense Me…	RNA binding	GO:0003723
RC6G0045900	mRNA:RC6G0045900	Rosa chinensis	mRNA	Rosa chinensis Whole Genome v1.0 Assembly & Annotation	Chr06	4640213	4641432	Chr06:4640213..4641432	AT4G12010.1 | Symbols: | Disease resistance protein (TIR-NBS-LRR class) family | chr4:7197325-7201393 REVERSE LENGTH=1219; Disease resistance-like protein CSA1 OS=Arabidopsis thaliana GN=CSA1 PE=4 SV=1; PREDICTED: TMV resistance protein N-like [Prunus mume]; tr|M5Y961|M5Y961_PRUPE Uncharacterized protein OS=Prunus persica GN=PRUPE_ppb015618mg PE=4 SV=1	L domain-like; LEUCINE-RICH REPEAT-CONTAINING PROTEIN; Leu-rich_rpt; LRR_8; LRR_dom_sf; protein binding	protein binding	GO:0005515
RC6G0046200	mRNA:RC6G0046200	Rosa chinensis	mRNA	Rosa chinensis Whole Genome v1.0 Assembly & Annotation	Chr06	4667527	4668604	Chr06:4667527..4668604	AT5G17680.1 | Symbols: | disease resistance protein (TIR-NBS-LRR class), putative | chr5:5822999-5827153 FORWARD LENGTH=1294; TMV resistance protein N OS=Nicotiana glutinosa GN=N PE=1 SV=1; TMV resistance protein N [Prunus persica] &gt;gi|1162518995|ref|XP_020410503.1| TMV resistance protein N [Prunus persica] &gt;gi|1139802611|gb|ONI35229.1| hypothetical protein PRUPE_1G523900 [Prunus persica]; …
RC6G0046300	mRNA:RC6G0046300	Rosa chinensis	mRNA	Rosa chinensis Whole Genome v1.0 Assembly & Annotation	Chr06	4670709	4671191	Chr06:4670709..4671191	AT1G63880.1 | Symbols: | Disease resistance protein (TIR-NBS-LRR class) family | chr1:23712514-23716047 REVERSE LENGTH=1017; Disease resistance protein RML1B OS=Arabidopsis thaliana GN=RLM1B PE=2 SV=1; PREDICTED: probable WRKY transcription factor 19 [Fragaria vesca subsp. vesca]; tr|M5VJH8|M5VJH8_PRUPE Uncharacterized protein (Fragment) OS=Prunus persica GN=PRUPE_ppa022242mg PE=4 SV=1	L domain-like; LEUCINE-RICH REPEAT-CONTAINING PROTEIN; LRR_dom_sf
RC6G0046400	mRNA:RC6G0046400	Rosa chinensis	mRNA	Rosa chinensis Whole Genome v1.0 Assembly & Annotation	Chr06	4707989	4710364	Chr06:4707989..4710364	AT4G12010.1 | Symbols: | Disease resistance protein (TIR-NBS-LRR class) family | chr4:7197325-7201393 REVERSE LENGTH=1219; PREDICTED: TMV resistance protein N-like [Pyrus x bretschneideri]; TMV resistance protein N OS=Nicotiana glutinosa GN=N PE=1 SV=1; tr|V4TYG7|V4TYG7_9ROSI Uncharacterized protein OS=Citrus clementina GN=CICLE_v10023938mg PE=4 SV=1	disorder_prediction; L domain-like; Leu-rich_rpt; LRR_1; LRR_dom_sf; protein binding	protein binding	GO:0005515
RC6G0046500	mRNA:RC6G0046500	Rosa chinensis	mRNA	Rosa chinensis Whole Genome v1.0 Assembly & Annotation	Chr06	4728646	4729273	Chr06:4728646..4729273	AT5G36930.1 | Symbols: | Disease resistance protein (TIR-NBS-LRR class) family | chr5:14567771-14571907 REVERSE LENGTH=1188; Disease resistance-like protein CSA1 OS=Arabidopsis thaliana GN=CSA1 PE=4 SV=1; PREDICTED: TMV resistance protein N-like isoform X2 [Prunus mume]; tr|M5XPF5|M5XPF5_PRUPE Uncharacterized protein OS=Prunus persica GN=PRUPE_ppa023385mg PE=4 SV=1	L domain-like; LEUCINE-RICH REPEAT-CONTAINING PROTEIN; LRR_dom_sf
RC6G0046600	mRNA:RC6G0046600	Rosa chinensis	mRNA	Rosa chinensis Whole Genome v1.0 Assembly & Annotation	Chr06	4748698	4750511	Chr06:4748698..4750511	AT5G17680.1 | Symbols: | disease resistance protein (TIR-NBS-LRR class), putative | chr5:5822999-5827153 FORWARD LENGTH=1294; hypothetical protein PRUPE_1G524000 [Prunus persica]; TMV resistance protein N OS=Nicotiana glutinosa GN=N PE=1 SV=1; tr|M5Y961|M5Y961_PRUPE Uncharacterized protein OS=Prunus persica GN=PRUPE_ppb015618mg PE=4 SV=1	Activation of caspases through apoptosome-mediated cleavage; ADP binding; DISEASERSIST; Formation of apoptosome; LEUCINE-RICH REPEAT-CONTAINING PROTEIN; NB-ARC; Neutrophil degranulation; P-loop containing nucleoside triphosphate hydrolases; P-loop_NTPase; protein binding; &quot;Winged helix&quot; DNA-binding domain; signal transduction; TIR; TIR_dom; Toll/Interleukin receptor TIR domain; Toll_tir…	ADP binding; protein binding; signal transduction	GO:0005515; GO:0007165; GO:0043531
RC6G0046700	mRNA:RC6G0046700	Rosa chinensis	mRNA	Rosa chinensis Whole Genome v1.0 Assembly & Annotation	Chr06	4750930	4752152	Chr06:4750930..4752152	AT1G69550.1 | Symbols: | disease resistance protein (TIR-NBS-LRR class) | chr1:26148836-26153374 REVERSE LENGTH=1400; TMV resistance protein N OS=Nicotiana glutinosa GN=N PE=1 SV=1; tr|F6GYS4|F6GYS4_VITVI Uncharacterized protein OS=Vitis vinifera GN=VIT_18s0117g00370 PE=4 SV=1; unnamed protein product, partial [Vitis vinifera]	L domain-like; Leu-rich_rpt; LRR_8; LRR_dom_sf; protein binding	protein binding	GO:0005515
RC6G0047700	mRNA:RC6G0047700	Rosa chinensis	mRNA	Rosa chinensis Whole Genome v1.0 Assembly & Annotation	Chr06	4840867	4843081	Chr06:4840867..4843081	AT1G69550.1 | Symbols: | disease resistance protein (TIR-NBS-LRR class) | chr1:26148836-26153374 REVERSE LENGTH=1400; PREDICTED: TMV resistance protein N-like isoform X4 [Vitis vinifera]; TMV resistance protein N OS=Nicotiana glutinosa GN=N PE=1 SV=1; tr|M5VJH8|M5VJH8_PRUPE Uncharacterized protein (Fragment) OS=Prunus persica GN=PRUPE_ppa022242mg PE=4 SV=1	L domain-like; Leu-rich_rpt; LRR; LRR_1; LRR_dom_sf; protein binding	protein binding	GO:0005515
RC6G0047800	mRNA:RC6G0047800	Rosa chinensis	mRNA	Rosa chinensis Whole Genome v1.0 Assembly & Annotation	Chr06	4860006	4861816	Chr06:4860006..4861816	AT4G12010.1 | Symbols: | Disease resistance protein (TIR-NBS-LRR class) family | chr4:7197325-7201393 REVERSE LENGTH=1219; PREDICTED: TMV resistance protein N-like [Pyrus x bretschneideri]; TMV resistance protein N OS=Nicotiana glutinosa GN=N PE=1 SV=1; tr|M5VJH8|M5VJH8_PRUPE Uncharacterized protein (Fragment) OS=Prunus persica GN=PRUPE_ppa022242mg PE=4 SV=1	L domain-like; Leu-rich_rpt; LRR; LRR_dom_sf; protein binding	protein binding	GO:0005515
RC6G0048000	mRNA:RC6G0048000	Rosa chinensis	mRNA	Rosa chinensis Whole Genome v1.0 Assembly & Annotation	Chr06	4894787	4896428	Chr06:4894787..4896428	AT1G69550.1 | Symbols: | disease resistance protein (TIR-NBS-LRR class) | chr1:26148836-26153374 REVERSE LENGTH=1400; TMV resistance protein N isoform X1 [Prunus persica] &gt;gi|1139754170|gb|ONH89627.1| hypothetical protein PRUPE_8G005300 [Prunus persica]; TMV resistance protein N OS=Nicotiana glutinosa GN=N PE=1 SV=1; tr|M5VJH8|M5VJH8_PRUPE Uncharacterized protein (Fragment) OS=Prunus persica G…	L domain-like; LRR_dom_sf
RC6G0048400	mRNA:RC6G0048400	Rosa chinensis	mRNA	Rosa chinensis Whole Genome v1.0 Assembly & Annotation	Chr06	4919872	4920507	Chr06:4919872..4920507	AT1G69550.1 | Symbols: | disease resistance protein (TIR-NBS-LRR class) | chr1:26148836-26153374 REVERSE LENGTH=1400; hypothetical protein COLO4_17384 [Corchorus olitorius]; Probable WRKY transcription factor 19 OS=Arabidopsis thaliana GN=WRKY19 PE=3 SV=1; tr|A0A1R3JD20|A0A1R3JD20_9ROSI Uncharacterized protein OS=Corchorus olitorius GN=COLO4_17384 PE=4 SV=1	L domain-like; LRR_dom_sf
RC6G0051800	mRNA:RC6G0051800	Rosa chinensis	mRNA	Rosa chinensis Whole Genome v1.0 Assembly & Annotation	Chr06	5364997	5365315	Chr06:5364997..5365315	AT5G36930.2 | Symbols: | Disease resistance protein (TIR-NBS-LRR class) family | chr5:14567771-14571916 REVERSE LENGTH=1191; PREDICTED: TMV resistance protein N-like [Pyrus x bretschneideri]; tr|A0A1L6KYS9|A0A1L6KYS9_VITPS Putative disease resistance protein OS=Vitis pseudoreticulata PE=2 SV=1	LEUCINE-RICH REPEAT-CONTAINING PROTEIN; LRR_dom_sf
RC6G0052000	mRNA:RC6G0052000	Rosa chinensis	mRNA	Rosa chinensis Whole Genome v1.0 Assembly & Annotation	Chr06	5413192	5415967	Chr06:5413192..5415967	AT5G36930.2 | Symbols: | Disease resistance protein (TIR-NBS-LRR class) family | chr5:14567771-14571916 REVERSE LENGTH=1191; PREDICTED: TMV resistance protein N-like [Fragaria vesca subsp. vesca]; TMV resistance protein N OS=Nicotiana glutinosa GN=N PE=1 SV=1; tr|M5XS57|M5XS57_PRUPE Uncharacterized protein OS=Prunus persica GN=PRUPE_ppa023967mg PE=4 SV=1	Activation of caspases through apoptosome-mediated cleavage; ADP binding; DISEASERSIST; Formation of apoptosome; L domain-like; Leu-rich_rpt_3; LRR_3; LRR_dom_sf; NB-ARC; Neutrophil degranulation; P-loop containing nucleoside triphosphate hydrolases; P-loop_NTPase; TP53 Regulates Transcription of Caspase Activators and Caspases; Transcriptional Regulation by E2F6	ADP binding	GO:0043531
RC6G0052300	mRNA:RC6G0052300	Rosa chinensis	mRNA	Rosa chinensis Whole Genome v1.0 Assembly & Annotation	Chr06	5449373	5449829	Chr06:5449373..5449829	AT5G45230.1 | Symbols: | Disease resistance protein (TIR-NBS-LRR class) family | chr5:18302147-18308303 REVERSE LENGTH=1231; Disease resistance protein RPS4 OS=Arabidopsis thaliana GN=RPS4 PE=2 SV=1; PREDICTED: TMV resistance protein N-like [Fragaria vesca subsp. vesca]; tr|B9T115|B9T115_RICCO Leucine-rich repeat-containing protein, putative OS=Ricinus communis GN=RCOM_0458060 PE=4 SV=1	FAMILY NOT NAMED
RC6G0091800	mRNA:RC6G0091800	Rosa chinensis	mRNA	Rosa chinensis Whole Genome v1.0 Assembly & Annotation	Chr06	9743525	9744055	Chr06:9743525..9744055	AT5G17680.1 | Symbols: | disease resistance protein (TIR-NBS-LRR class), putative | chr5:5822999-5827153 FORWARD LENGTH=1294; Disease resistance protein RPS6 OS=Arabidopsis thaliana GN=RPS6 PE=1 SV=1; PREDICTED: TMV resistance protein N-like [Fragaria vesca subsp. vesca]; tr|M5VIJ8|M5VIJ8_PRUPE Uncharacterized protein OS=Prunus persica GN=PRUPE_ppa025692mg PE=4 SV=1	L domain-like; LEUCINE-RICH REPEAT-CONTAINING PROTEIN; LRR_dom_sf; SUBFAMILY NOT NAMED
RC6G0092800	mRNA:RC6G0092800	Rosa chinensis	mRNA	Rosa chinensis Whole Genome v1.0 Assembly & Annotation	Chr06	10072725	10075382	Chr06:10072725..10075382	AT5G17680.1 | Symbols: | disease resistance protein (TIR-NBS-LRR class), putative | chr5:5822999-5827153 FORWARD LENGTH=1294; PREDICTED: TMV resistance protein N-like [Malus domestica]; TMV resistance protein N OS=Nicotiana glutinosa GN=N PE=1 SV=1; tr|A0A067LGR3|A0A067LGR3_JATCU Uncharacterized protein OS=Jatropha curcas GN=JCGZ_08515 PE=4 SV=1	Coil; LEUCINE-RICH REPEAT-CONTAINING PROTEIN; protein binding; signal transduction; TIR; TIR_dom; Toll/Interleukin receptor TIR domain; Toll_tir_struct_dom_sf	protein binding; signal transduction	GO:0005515; GO:0007165
