# Supplementary material for: Meta-Analysis of Rose Rosette Disease-Resistant Quantitative Trait Loci and a Search for Candidate Genes
Source: Pathogens. 2023 Apr 8;12(4):575. doi: 10.3390/pathogens12040575 (PMC10146096; doi:10.3390/pathogens12040575)
Supplement: Supplementary file 1 [file pathogens-12-00575-s001.zip › TableS12.xlsx]

## Sheet: Sheet 1
Table S12. List of candidate genes discovered in the MetaRRD6.2 interval including name, location, BLAST, functional analysis (InterPro), GO term and GO accession number.
Name	Unique.Name	Organism	Type	Genome.Transcriptome	Chromosome.Scaffold	Start.position	Stop.position	Location	BLAST	InterPro	GO.Term	GO.Accession
RC6G0203300	mRNA:RC6G0203300	Rosa chinensis	mRNA	Rosa chinensis Whole Genome v1.0 Assembly & Annotation	Chr06	23594062	23598587	Chr06:23594062..23598587	AT3G14470.1 | Symbols: | NB-ARC domain-containing disease resistance protein | chr3:4857940-4861104 FORWARD LENGTH=1054; PREDICTED: putative disease resistance protein RGA3 isoform X2 [Fragaria vesca subsp. vesca]; Putative disease resistance protein RGA3 OS=Solanum bulbocastanum GN=RGA3 PE=2 SV=2; tr|M5XGE8|M5XGE8_PRUPE Uncharacterized protein OS=Prunus persica GN=PRUPE_ppa016447mg PE=3 SV=1	Activation of caspases through apoptosome-mediated cleavage; ADP binding; DISEASERSIST; Formation of apoptosome; L domain-like; LEUCINE-RICH REPEAT-CONTAINING PROTEIN; Leu-rich_rpt; LRR; LRR_dom_sf; NB-ARC; Neutrophil degranulation; P-loop containing nucleoside triphosphate hydrolases; P-loop_NTPase; protein binding; SUBFAMILY NOT NAMED; TP53 Regulates Transcription of Caspase Activators and Casp…	ADP binding; protein binding	GO:0005515; GO:0043531
RC6G0204800	mRNA:RC6G0204800	Rosa chinensis	mRNA	Rosa chinensis Whole Genome v1.0 Assembly & Annotation	Chr06	23733666	23740688	Chr06:23733666..23740688	AT3G14460.1 | Symbols: | LRR and NB-ARC domains-containing disease resistance protein | chr3:4851990-4856264 REVERSE LENGTH=1424; PREDICTED: putative disease resistance RPP13-like protein 1 [Fragaria vesca subsp. vesca]; Putative disease resistance protein At3g14460 OS=Arabidopsis thaliana GN=At3g14460 PE=3 SV=1; tr|A0A022PWS9|A0A022PWS9_ERYGU Uncharacterized protein (Fragment) OS=Erythranthe gut…	Activation of caspases through apoptosome-mediated cleavage; ADP binding; Coil; DISEASERSIST; Formation of apoptosome; L domain-like; LEUCINE-RICH REPEAT-CONTAINING PROTEIN; LRR_dom_sf; NB-ARC; Neutrophil degranulation; P-loop containing nucleoside triphosphate hydrolases; P-loop_NTPase; TP53 Regulates Transcription of Caspase Activators and Caspases; Transcriptional Regulation by E2F6; WH-like_D…	ADP binding	GO:0043531
RC6G0214000	mRNA:RC6G0214000	Rosa chinensis	mRNA	Rosa chinensis Whole Genome v1.0 Assembly & Annotation	Chr06	25147821	25151340	Chr06:25147821..25151340	AT3G14470.1 | Symbols: | NB-ARC domain-containing disease resistance protein | chr3:4857940-4861104 FORWARD LENGTH=1054; disease resistance protein RGA2 [Prunus persica] &gt;gi|1139755395|gb|ONH90852.1| hypothetical protein PRUPE_8G077600 [Prunus persica]; Putative disease resistance protein RGA1 OS=Solanum bulbocastanum GN=RGA1 PE=2 SV=2; tr|M5W0L9|M5W0L9_PRUPE Uncharacterized protein OS=Prunus …	Activation of caspases through apoptosome-mediated cleavage; ADP binding; Coil; DISEASERSIST; Formation of apoptosome; L domain-like; LEUCINE-RICH REPEAT-CONTAINING PROTEIN; LRR_dom_sf; NB-ARC; Neutrophil degranulation; P-loop containing nucleoside triphosphate hydrolases; P-loop_NTPase; RNI-like; RX-CC_like; TP53 Regulates Transcription of Caspase Activators and Caspases; Transcriptional Regulat…	ADP binding	GO:0043531
RC6G0216200	mRNA:RC6G0216200	Rosa chinensis	mRNA	Rosa chinensis Whole Genome v1.0 Assembly & Annotation	Chr06	25400339	25403357	Chr06:25400339..25403357	AT3G14470.1 | Symbols: | NB-ARC domain-containing disease resistance protein | chr3:4857940-4861104 FORWARD LENGTH=1054; PREDICTED: disease resistance protein RGA2-like [Prunus mume]; Putative disease resistance protein RGA1 OS=Solanum bulbocastanum GN=RGA1 PE=2 SV=2; tr|M5VLJ4|M5VLJ4_PRUPE Uncharacterized protein OS=Prunus persica GN=PRUPE_ppa025954mg PE=3 SV=1	Activation of caspases through apoptosome-mediated cleavage; ADP binding; DISEASERSIST; Formation of apoptosome; L domain-like; LEUCINE-RICH REPEAT-CONTAINING PROTEIN; LRR_dom_sf; NB-ARC; Neutrophil degranulation; P-loop containing nucleoside triphosphate hydrolases; P-loop_NTPase; RNI-like; RX-CC_like; TP53 Regulates Transcription of Caspase Activators and Caspases; Transcriptional Regulation by…	ADP binding	GO:0043531
RC6G0216300	mRNA:RC6G0216300	Rosa chinensis	mRNA	Rosa chinensis Whole Genome v1.0 Assembly & Annotation	Chr06	25430898	25431719	Chr06:25430898..25431719	AT3G14470.1 | Symbols: | NB-ARC domain-containing disease resistance protein | chr3:4857940-4861104 FORWARD LENGTH=1054; PREDICTED: disease resistance protein RGA2-like [Prunus mume]; Putative disease resistance protein RGA1 OS=Solanum bulbocastanum GN=RGA1 PE=2 SV=2; tr|M5VLJ4|M5VLJ4_PRUPE Uncharacterized protein OS=Prunus persica GN=PRUPE_ppa025954mg PE=3 SV=1	Activation of caspases through apoptosome-mediated cleavage; ADP binding; DISEASERSIST; FAMILY NOT NAMED; Formation of apoptosome; NB-ARC; Neutrophil degranulation; P-loop containing nucleoside triphosphate hydrolases; P-loop_NTPase; TP53 Regulates Transcription of Caspase Activators and Caspases; Transcriptional Regulation by E2F6	ADP binding	GO:0043531
RC6G0216400	mRNA:RC6G0216400	Rosa chinensis	mRNA	Rosa chinensis Whole Genome v1.0 Assembly & Annotation	Chr06	25431778	25436441	Chr06:25431778..25436441	AT3G14470.1 | Symbols: | NB-ARC domain-containing disease resistance protein | chr3:4857940-4861104 FORWARD LENGTH=1054; disease resistance protein RGA2 [Prunus persica] &gt;gi|1139755390|gb|ONH90847.1| hypothetical protein PRUPE_8G077100 [Prunus persica]; Putative disease resistance protein RGA1 OS=Solanum bulbocastanum GN=RGA1 PE=2 SV=2; tr|M5W0L9|M5W0L9_PRUPE Uncharacterized protein OS=Prunus …	Activation of caspases through apoptosome-mediated cleavage; ADP binding; disorder_prediction; Formation of apoptosome; L domain-like; LEUCINE-RICH REPEAT-CONTAINING PROTEIN; LRR_dom_sf; NB-ARC; Neutrophil degranulation; P-loop containing nucleoside triphosphate hydrolases; P-loop_NTPase; RNI-like; SUBFAMILY NOT NAMED; TP53 Regulates Transcription of Caspase Activators and Caspases; Transcription…	ADP binding	GO:0043531
RC6G0216500	mRNA:RC6G0216500	Rosa chinensis	mRNA	Rosa chinensis Whole Genome v1.0 Assembly & Annotation	Chr06	25437073	25438805	Chr06:25437073..25438805	60S ribosomal protein L38 OS=Arabidopsis thaliana GN=RPL38A PE=3 SV=1; AT3G59540.1 | Symbols: | Ribosomal L38e protein family | chr3:21995897-21996742 REVERSE LENGTH=69; PREDICTED: 60S ribosomal protein L38-like [Fragaria vesca subsp. vesca]; tr|A9PDL5|A9PDL5_POPTR Uncharacterized protein OS=Populus trichocarpa GN=POPTR_0007s01660g PE=2 SV=1	60S RIBOSOMAL PROTEIN L38; Eukaryotic Translation Termination; Formation of a pool of free 40S subunits; GTP hydrolysis and joining of the 60S ribosomal subunit; intracellular; L13a-mediated translational silencing of Ceruloplasmin expression; Major pathway of rRNA processing in the nucleolus and cytosol; Nonsense Mediated Decay (NMD) enhanced by the Exon Junction Complex (EJC); Nonsense Mediated…	intracellular; ribosome; structural constituent of ribosome; translation	GO:0003735; GO:0005622; GO:0005840; GO:0006412
RC6G0218600	mRNA:RC6G0218600	Rosa chinensis	mRNA	Rosa chinensis Whole Genome v1.0 Assembly & Annotation	Chr06	25752976	25753670	Chr06:25752976..25753670	60S ribosomal protein L11 OS=Medicago sativa GN=RPL11 PE=2 SV=1; AT5G45775.2 | Symbols: | Ribosomal L5P family protein | chr5:18565281-18566496 REVERSE LENGTH=182; hypothetical protein MANES_16G041800 [Manihot esculenta]; tr|I3T8M4|I3T8M4_LOTJA Uncharacterized protein OS=Lotus japonicus PE=2 SV=1	60S RIBOSOMAL PROTEIN L11-RELATED; Eukaryotic Translation Termination; Formation of a pool of free 40S subunits; GTP hydrolysis and joining of the 60S ribosomal subunit; L13a-mediated translational silencing of Ceruloplasmin expression; Major pathway of rRNA processing in the nucleolus and cytosol; Nonsense Mediated Decay (NMD) enhanced by the Exon Junction Complex (EJC); Nonsense Mediated Decay …	ribosome; structural constituent of ribosome; translation	GO:0003735; GO:0005840; GO:0006412
RC6G0228400	mRNA:RC6G0228400	Rosa chinensis	mRNA	Rosa chinensis Whole Genome v1.0 Assembly & Annotation	Chr06	27597407	27599408	Chr06:27597407..27599408	60S ribosomal protein L4 OS=Prunus armeniaca GN=RPL4 PE=2 SV=1; AT3G09630.1 | Symbols: | Ribosomal protein L4/L1 family | chr3:2953813-2955444 FORWARD LENGTH=406; PREDICTED: 60S ribosomal protein L4 [Fragaria vesca subsp. vesca]; tr|A0A200QHG8|A0A200QHG8_9MAGN Ribosomal protein L4/L1e OS=Macleaya cordata GN=BVC80_1751g99 PE=4 SV=1	60S RIBOSOMAL PROTEIN L4; Coil; disorder_prediction; Eukaryotic Translation Termination; Formation of a pool of free 40S subunits; GTP hydrolysis and joining of the 60S ribosomal subunit; L13a-mediated translational silencing of Ceruloplasmin expression; Major pathway of rRNA processing in the nucleolus and cytosol; Nonsense Mediated Decay (NMD) enhanced by the Exon Junction Complex (EJC); Nonsen…	ribosome; structural constituent of ribosome; translation	GO:0003735; GO:0005840; GO:0006412
RC6G0183100	mRNA:RC6G0183100	Rosa chinensis	mRNA	Rosa chinensis Whole Genome v1.0 Assembly & Annotation	Chr06	20368290	20370320	Chr06:20368290..20370320	AT5G45200.1 | Symbols: | Disease resistance protein (TIR-NBS-LRR class) family | chr5:18283967-18290332 REVERSE LENGTH=1261; Disease resistance protein RML1A OS=Arabidopsis thaliana GN=RLM1A PE=4 SV=1; PREDICTED: TMV resistance protein N-like [Malus domestica] &gt;gi|1039894351|ref|XP_017189989.1| PREDICTED: TMV resistance protein N-like [Malus domestica] &gt;gi|1039894353|ref|XP_017189990.1| PRE…	disorder_prediction; LEUCINE-RICH REPEAT-CONTAINING PROTEIN; LRR_dom_sf; RNI-like; SUBFAMILY NOT NAMED
RC6G0183200	mRNA:RC6G0183200	Rosa chinensis	mRNA	Rosa chinensis Whole Genome v1.0 Assembly & Annotation	Chr06	20370322	20371584	Chr06:20370322..20371584	AT5G46450.1 | Symbols: | Disease resistance protein (TIR-NBS-LRR class) family | chr5:18835618-18839546 FORWARD LENGTH=1123; PREDICTED: protein SUPPRESSOR OF npr1-1, CONSTITUTIVE 1-like [Fragaria vesca subsp. vesca]; Protein SUPPRESSOR OF npr1-1, CONSTITUTIVE 1 OS=Arabidopsis thaliana GN=SNC1 PE=1 SV=5; tr|M5XPA6|M5XPA6_PRUPE Uncharacterized protein OS=Prunus persica GN=PRUPE_ppa025310mg PE=4 SV=1	L domain-like; LEUCINE-RICH REPEAT-CONTAINING PROTEIN; LRR_dom_sf
RC6G0183500	mRNA:RC6G0183500	Rosa chinensis	mRNA	Rosa chinensis Whole Genome v1.0 Assembly & Annotation	Chr06	20403767	20408944	Chr06:20403767..20408944	AT5G17680.1 | Symbols: | disease resistance protein (TIR-NBS-LRR class), putative | chr5:5822999-5827153 FORWARD LENGTH=1294; TMV resistance protein N isoform X1 [Prunus persica] &gt;gi|1162529766|ref|XP_020414145.1| TMV resistance protein N isoform X1 [Prunus persica] &gt;gi|1139787585|gb|ONI21012.1| hypothetical protein PRUPE_2G045200 [Prunus persica] &gt;gi|1139787586|gb|ONI21013.1| hypothetic…	Activation of caspases through apoptosome-mediated cleavage; ADP binding; DISEASERSIST; Formation of apoptosome; L domain-like; LEUCINE-RICH REPEAT-CONTAINING PROTEIN; LRR_dom_sf; NB-ARC; Neutrophil degranulation; P-loop containing nucleoside triphosphate hydrolases; P-loop_NTPase; protein binding; &quot;Winged helix&quot; DNA-binding domain; signal transduction; SUBFAMILY NOT NAMED; TIR; TIR_dom…	ADP binding; protein binding; signal transduction	GO:0005515; GO:0007165; GO:0043531
RC6G0183800	mRNA:RC6G0183800	Rosa chinensis	mRNA	Rosa chinensis Whole Genome v1.0 Assembly & Annotation	Chr06	20434830	20435093	Chr06:20434830..20435093	AT5G45260.1 | Symbols: RRS1, ATWRKY52, SLH1 | Disease resistance protein (TIR-NBS-LRR class) | chr5:18326277-18332229 FORWARD LENGTH=1288; Disease resistance protein RRS1 OS=Arabidopsis thaliana GN=RRS1 PE=1 SV=1; PREDICTED: protein SUPPRESSOR OF npr1-1, CONSTITUTIVE 1-like [Fragaria vesca subsp. vesca]; tr|M5XPA6|M5XPA6_PRUPE Uncharacterized protein OS=Prunus persica GN=PRUPE_ppa025310mg PE=4 SV…	LEUCINE-RICH REPEAT-CONTAINING PROTEIN
RC6G0188600	mRNA:RC6G0188600	Rosa chinensis	mRNA	Rosa chinensis Whole Genome v1.0 Assembly & Annotation	Chr06	21155928	21157351	Chr06:21155928..21157351	AT4G12010.1 | Symbols: | Disease resistance protein (TIR-NBS-LRR class) family | chr4:7197325-7201393 REVERSE LENGTH=1219; PREDICTED: TMV resistance protein N-like [Fragaria vesca subsp. vesca]; TMV resistance protein N OS=Nicotiana glutinosa GN=N PE=1 SV=1; tr|A5AP14|A5AP14_VITVI Uncharacterized protein OS=Vitis vinifera GN=VITISV_033530 PE=4 SV=1	L domain-like; Leu-rich_rpt; LRR; LRR_dom_sf; protein binding	protein binding	GO:0005515
RC6G0193400	mRNA:RC6G0193400	Rosa chinensis	mRNA	Rosa chinensis Whole Genome v1.0 Assembly & Annotation	Chr06	22139873	22142405	Chr06:22139873..22142405	AT5G17680.1 | Symbols: | disease resistance protein (TIR-NBS-LRR class), putative | chr5:5822999-5827153 FORWARD LENGTH=1294; PREDICTED: TMV resistance protein N-like [Fragaria vesca subsp. vesca]; Protein SUPPRESSOR OF npr1-1, CONSTITUTIVE 1 OS=Arabidopsis thaliana GN=SNC1 PE=1 SV=5; tr|M5VUC7|M5VUC7_PRUPE Uncharacterized protein (Fragment) OS=Prunus persica GN=PRUPE_ppa023180mg PE=4 SV=1	L domain-like; LEUCINE-RICH REPEAT-CONTAINING PROTEIN; LRR_dom_sf; SUBFAMILY NOT NAMED
RC6G0197000	mRNA:RC6G0197000	Rosa chinensis	mRNA	Rosa chinensis Whole Genome v1.0 Assembly & Annotation	Chr06	22624488	22628680	Chr06:22624488..22628680	AT5G17680.1 | Symbols: | disease resistance protein (TIR-NBS-LRR class), putative | chr5:5822999-5827153 FORWARD LENGTH=1294; PREDICTED: TMV resistance protein N-like [Prunus mume]; TMV resistance protein N OS=Nicotiana glutinosa GN=N PE=1 SV=1; tr|M5VUC7|M5VUC7_PRUPE Uncharacterized protein (Fragment) OS=Prunus persica GN=PRUPE_ppa023180mg PE=4 SV=1	Activation of caspases through apoptosome-mediated cleavage; ADP binding; DISEASERSIST; disorder_prediction; Formation of apoptosome; L domain-like; LRR_dom_sf; NB-ARC; Neutrophil degranulation; P-loop containing nucleoside triphosphate hydrolases; P-loop_NTPase; protein binding; &quot;Winged helix&quot; DNA-binding domain; signal transduction; TIR; TIR_dom; Toll/Interleukin receptor TIR domain; …	ADP binding; protein binding; signal transduction	GO:0005515; GO:0007165; GO:0043531
RC6G0197300	mRNA:RC6G0197300	Rosa chinensis	mRNA	Rosa chinensis Whole Genome v1.0 Assembly & Annotation	Chr06	22658497	22666183	Chr06:22658497..22666183	AT5G17680.1 | Symbols: | disease resistance protein (TIR-NBS-LRR class), putative | chr5:5822999-5827153 FORWARD LENGTH=1294; TMV resistance protein N isoform X1 [Prunus persica] &gt;gi|1162529766|ref|XP_020414145.1| TMV resistance protein N isoform X1 [Prunus persica] &gt;gi|1139787585|gb|ONI21012.1| hypothetical protein PRUPE_2G045200 [Prunus persica] &gt;gi|1139787586|gb|ONI21013.1| hypothetic…	AAA; Activation of caspases through apoptosome-mediated cleavage; ADP binding; Coil; DISEASERSIST; disorder_prediction; Formation of apoptosome; L domain-like; LEUCINE-RICH REPEAT-CONTAINING PROTEIN; LRR_dom_sf; NB-ARC; Neutrophil degranulation; P-loop containing nucleoside triphosphate hydrolases; P-loop_NTPase; protein binding; &quot;Winged helix&quot; DNA-binding domain; signal transduction; T…	ADP binding; protein binding; signal transduction	GO:0005515; GO:0007165; GO:0043531
RC6G0201800	mRNA:RC6G0201800	Rosa chinensis	mRNA	Rosa chinensis Whole Genome v1.0 Assembly & Annotation	Chr06	23389340	23391414	Chr06:23389340..23391414	AT2G14080.1 | Symbols: | Disease resistance protein (TIR-NBS-LRR class) family | chr2:5925225-5929600 FORWARD LENGTH=1215; PREDICTED: TMV resistance protein N-like [Fragaria vesca subsp. vesca]; Protein SUPPRESSOR OF npr1-1, CONSTITUTIVE 1 OS=Arabidopsis thaliana GN=SNC1 PE=1 SV=5; tr|M5VMP9|M5VMP9_PRUPE Uncharacterized protein OS=Prunus persica GN=PRUPE_ppa000577mg PE=4 SV=1	L domain-like; LEUCINE-RICH REPEAT-CONTAINING PROTEIN; LRR_dom_sf; SUBFAMILY NOT NAMED
RC6G0201900	mRNA:RC6G0201900	Rosa chinensis	mRNA	Rosa chinensis Whole Genome v1.0 Assembly & Annotation	Chr06	23392383	23393123	Chr06:23392383..23393123	AT5G36930.1 | Symbols: | Disease resistance protein (TIR-NBS-LRR class) family | chr5:14567771-14571907 REVERSE LENGTH=1188; PREDICTED: TMV resistance protein N-like [Fragaria vesca subsp. vesca]; TMV resistance protein N OS=Nicotiana glutinosa GN=N PE=1 SV=1; tr|M5VHY1|M5VHY1_PRUPE Uncharacterized protein OS=Prunus persica GN=PRUPE_ppa026276mg PE=4 SV=1	LEUCINE-RICH REPEAT-CONTAINING PROTEIN; P-loop containing nucleoside triphosphate hydrolases; P-loop_NTPase; protein binding; signal transduction; TIR; TIR_dom; Toll/Interleukin receptor TIR domain; Toll_tir_struct_dom_sf	protein binding; signal transduction	GO:0005515; GO:0007165
RC6G0202400	mRNA:RC6G0202400	Rosa chinensis	mRNA	Rosa chinensis Whole Genome v1.0 Assembly & Annotation	Chr06	23439171	23442402	Chr06:23439171..23442402	AT5G17680.1 | Symbols: | disease resistance protein (TIR-NBS-LRR class), putative | chr5:5822999-5827153 FORWARD LENGTH=1294; PREDICTED: TMV resistance protein N-like [Fragaria vesca subsp. vesca]; TMV resistance protein N OS=Nicotiana glutinosa GN=N PE=1 SV=1; tr|M5VI95|M5VI95_PRUPE Uncharacterized protein (Fragment) OS=Prunus persica GN=PRUPE_ppa022914mg PE=4 SV=1	Activation of caspases through apoptosome-mediated cleavage; ADP binding; DISEASERSIST; Formation of apoptosome; L domain-like; LRR_dom_sf; NB-ARC; Neutrophil degranulation; P-loop containing nucleoside triphosphate hydrolases; P-loop_NTPase; protein binding; &quot;Winged helix&quot; DNA-binding domain; signal transduction; TIR; TIR_dom; Toll/Interleukin receptor TIR domain; Toll_tir_struct_dom_s…	ADP binding; protein binding; signal transduction	GO:0005515; GO:0007165; GO:0043531
RC6G0208000	mRNA:RC6G0208000	Rosa chinensis	mRNA	Rosa chinensis Whole Genome v1.0 Assembly & Annotation	Chr06	24190942	24191216	Chr06:24190942..24191216	AT4G16890.1 | Symbols: SNC1, BAL | disease resistance protein (TIR-NBS-LRR class), putative | chr4:9500506-9505455 REVERSE LENGTH=1301; PREDICTED: uncharacterized protein LOC101303284 [Fragaria vesca subsp. vesca]; Protein SUPPRESSOR OF npr1-1, CONSTITUTIVE 1 OS=Arabidopsis thaliana GN=SNC1 PE=1 SV=5; tr|S4S9Y4|S4S9Y4_FRAVE NBS protein (Fragment) OS=Fragaria vesca GN=NBS16 PE=2 SV=1	L domain-like; LEUCINE-RICH REPEAT-CONTAINING PROTEIN; LRR_dom_sf; SUBFAMILY NOT NAMED
RC6G0224600	mRNA:RC6G0224600	Rosa chinensis	mRNA	Rosa chinensis Whole Genome v1.0 Assembly & Annotation	Chr06	26880102	26882368	Chr06:26880102..26882368	AT5G17680.1 | Symbols: | disease resistance protein (TIR-NBS-LRR class), putative | chr5:5822999-5827153 FORWARD LENGTH=1294; PREDICTED: TMV resistance protein N-like [Fragaria vesca subsp. vesca]; Protein SUPPRESSOR OF npr1-1, CONSTITUTIVE 1 OS=Arabidopsis thaliana GN=SNC1 PE=1 SV=5; tr|F6GYS4|F6GYS4_VITVI Uncharacterized protein OS=Vitis vinifera GN=VIT_18s0117g00370 PE=4 SV=1	L domain-like; LRR_dom_sf
RC6G0241800	mRNA:RC6G0241800	Rosa chinensis	mRNA	Rosa chinensis Whole Genome v1.0 Assembly & Annotation	Chr06	30458368	30464847	Chr06:30458368..30464847	AT5G17680.1 | Symbols: | disease resistance protein (TIR-NBS-LRR class), putative | chr5:5822999-5827153 FORWARD LENGTH=1294; PREDICTED: TMV resistance protein N-like [Pyrus x bretschneideri]; TMV resistance protein N OS=Nicotiana glutinosa GN=N PE=1 SV=1; tr|M5VNN2|M5VNN2_PRUPE Uncharacterized protein OS=Prunus persica GN=PRUPE_ppa022091mg PE=4 SV=1	Activation of caspases through apoptosome-mediated cleavage; ADP binding; Coil; DISEASERSIST; disorder_prediction; Formation of apoptosome; L domain-like; LEUCINE-RICH REPEAT-CONTAINING PROTEIN; Leu-rich_rpt_3; LRR_3; LRR_dom_sf; NB-ARC; Neutrophil degranulation; P-loop containing nucleoside triphosphate hydrolases; P-loop_NTPase; protein binding; signal transduction; TIR; TIR_dom; Toll/Interleuk…	ADP binding; protein binding; signal transduction	GO:0005515; GO:0007165; GO:0043531
RC6G0179900	mRNA:RC6G0179900	Rosa chinensis	mRNA	Rosa chinensis Whole Genome v1.0 Assembly & Annotation	Chr06	19829080	19829697	Chr06:19829080..19829697	AT5G65970.1 | Symbols: MLO10, ATMLO10 | Seven transmembrane MLO family protein | chr5:26387509-26390407 REVERSE LENGTH=569; MLO-like protein 10 OS=Arabidopsis thaliana GN=MLO10 PE=2 SV=1; PREDICTED: MLO-like protein 5 [Fragaria vesca subsp. vesca]; tr|A0A1U7ZWC6|A0A1U7ZWC6_NELNU MLO-like protein OS=Nelumbo nucifera GN=LOC104596922 PE=3 SV=1	defense response; FAMILY NOT NAMED; integral component of membrane; Mlo; MLO-LIKE PROTEIN 5-RELATED	defense response; integral to membrane	GO:0006952; GO:0016021
